# Supplementary material
Source: PubMed Central journal article supplement (PMC6202164)
Supplement: NIHMS1503535-supplement-2.pdf [file NIHMS1503535-supplement-2.pdf]

SUPPLEMENTARY TABLE 2

| SNP        | CHR | POSITION | CASE ONLY |            | CASE-CONTROL |           |
|------------|-----|----------|-----------|------------|--------------|-----------|
|            |     |          | Z         | P          | Z            | P         |
|            |     |          | rs2236394 | 1          | 2446960      | -1.566    |
| rs2651888  | 1   | 3143384  | -1.486    | 0.137197   | -2.463       | 0.0137702 |
| rs10915495 | 1   | 4029733  | -1.496    | 0.134702   | -2.449       | 0.0143257 |
| rs10799149 | 1   | 5031379  | -1.069    | 0.285124   | -2.159       | 0.0308382 |
| rs12091928 | 1   | 5721189  | -0.959    | 0.337342   | -2.108       | 0.034988  |
| rs2986744  | 1   | 6554649  | -1.057    | 0.29044    | -2.269       | 0.0232396 |
| rs59833900 | 1   | 7278011  | -0.837    | 0.402313   | -1.938       | 0.0526353 |
| rs161826   | 1   | 7980338  | -0.572    | 0.567096   | -1.773       | 0.0761811 |
| rs7530465  | 1   | 9068386  | -0.276    | 0.78217    | -1.707       | 0.087768  |
| rs3762290  | 1   | 10177790 | -0.177    | 0.859331   | -1.721       | 0.0852239 |
| rs12085319 | 1   | 11029478 | -0.193    | 0.847203   | -1.553       | 0.120387  |
| rs2379160  | 1   | 11509499 | -0.041    | 0.967559   | -1.357       | 0.174754  |
| rs11121959 | 1   | 12753203 | -0.49     | 0.624018   | -1.833       | 0.06674   |
| rs2282189  | 1   | 13842586 | -0.765    | 0.444314   | -2.1         | 0.0357131 |
| rs61393101 | 1   | 14956294 | -1.099    | 0.271849   | -2.369       | 0.0178603 |
| rs12068752 | 1   | 15286096 | -1.118    | 0.26363    | -2.294       | 0.0217762 |
| rs11260721 | 1   | 16455052 | -1.478    | 0.139481   | -2.361       | 0.0182221 |
| rs72906031 | 1   | 16845719 | -1.387    | 0.165491   | -2.197       | 0.0280372 |
| rs1572790  | 1   | 18063132 | -1.563    | 0.118053   | -2.031       | 0.0422355 |
| rs4920466  | 1   | 18565897 | -1.739    | 0.0820645  | -2.101       | 0.0356133 |
| rs1500968  | 1   | 19802182 | -1.945    | 0.0517956  | -1.841       | 0.0656806 |
| rs6702859  | 1   | 21031983 | -1.795    | 0.0727039  | -1.63        | 0.103157  |
| rs4654773  | 1   | 22252262 | -1.565    | 0.117599   | -1.399       | 0.161952  |
| rs908500   | 1   | 23205508 | -1.336    | 0.18139    | -1.356       | 0.175087  |
| rs3889814  | 1   | 23731819 | -1.46     | 0.144267   | -1.354       | 0.175673  |
| rs9424374  | 1   | 24822500 | -1.448    | 0.147542   | -1.367       | 0.17176   |
| rs12073036 | 1   | 25530319 | -1.472    | 0.141056   | -1.44        | 0.149921  |
| rs933078   | 1   | 26324108 | -1.365    | 0.172263   | -1.443       | 0.14904   |
| rs1292074  | 1   | 27974394 | -1.03     | 0.303028   | -1.475       | 0.140328  |
| rs9426298  | 1   | 28990922 | -0.85     | 0.395305   | -1.385       | 0.166006  |
| rs4428852  | 1   | 29607279 | -0.591    | 0.554819   | -1.126       | 0.260301  |
| rs10798946 | 1   | 30442165 | -0.171    | 0.86387    | -0.867       | 0.386208  |
| rs1385328  | 1   | 30985854 | 0.049     | 0.960799   | -0.734       | 0.462827  |
| rs669538   | 1   | 32711360 | 0.751     | 0.452711   | -0.445       | 0.656236  |
| rs16835351 | 1   | 33779043 | 1.095     | 0.273342   | -0.234       | 0.814958  |
| rs1998714  | 1   | 34273244 | 1.482     | 0.138237   | -0.078       | 0.937431  |
| rs10158282 | 1   | 35440755 | 2.493     | 0.0126797  | 0.619        | 0.535834  |
| rs1768560  | 1   | 35926150 | 2.579     | 0.00990352 | 0.725        | 0.468713  |
| rs10908312 | 1   | 37105277 | 2.528     | 0.0114852  | 0.478        | 0.632978  |
| rs12239801 | 1   | 37876401 | 2.396     | 0.016588   | 0.145        | 0.884963  |
| rs6704425  | 1   | 38875991 | 2.367     | 0.0179286  | 0.162        | 0.871024  |
| rs260972   | 1   | 39550210 | 2.49      | 0.0127918  | 0.352        | 0.724755  |
| rs11207310 | 1   | 40481100 | 2.634     | 0.00843515 | 0.363        | 0.716778  |
| rs18996    | 1   | 41624520 | 3.029     | 0.00245015 | 0.502        | 0.616016  |
| rs4284254  | 1   | 42213076 | 3.079     | 0.00207694 | 0.51         | 0.610132  |
| rs3820546  | 1   | 43398085 | 3.117     | 0.00182606 | 0.522        | 0.601616  |
| rs6429644  | 1   | 44487280 | 3.151     | 0.00162785 | 0.402        | 0.687497  |
| rs61260531 | 1   | 45047805 | 3.11      | 0.00186989 | 0.34         | 0.734213  |
| rs12026893 | 1   | 45788479 | 3.091     | 0.00199348 | 0.347        | 0.72873   |

|            |   |          |       |            |        |           |
|------------|---|----------|-------|------------|--------|-----------|
| rs72892774 | 1 | 46951919 | 3.173 | 0.00150779 | 0.434  | 0.664473  |
| rs10890437 | 1 | 47461876 | 3.136 | 0.00171557 | 0.443  | 0.657547  |
| rs12119021 | 1 | 48385998 | 2.837 | 0.00455418 | 0.407  | 0.684308  |
| rs1531900  | 1 | 49158887 | 2.714 | 0.00664178 | 0.36   | 0.718837  |
| rs12731743 | 1 | 49907720 | 2.61  | 0.0090524  | 0.291  | 0.770998  |
| rs6659236  | 1 | 50705399 | 2.601 | 0.00930557 | 0.306  | 0.759823  |
| rs55681655 | 1 | 51801735 | 2.513 | 0.0119612  | 0.284  | 0.776479  |
| rs10157619 | 1 | 52836736 | 2.48  | 0.0131264  | 0.287  | 0.774435  |
| rs1288621  | 1 | 53946644 | 2.549 | 0.0108165  | 0.317  | 0.751426  |
| rs6696913  | 1 | 54386271 | 2.365 | 0.0180435  | 0.166  | 0.86851   |
| rs9887913  | 1 | 55462380 | 1.99  | 0.0466254  | -0.227 | 0.820801  |
| rs7550956  | 1 | 56426838 | 1.96  | 0.0499439  | -0.401 | 0.688395  |
| rs563921   | 1 | 57602383 | 2.081 | 0.0374724  | -0.217 | 0.828463  |
| rs2691465  | 1 | 57956702 | 1.984 | 0.0473086  | -0.239 | 0.811387  |
| rs72922103 | 1 | 59059073 | 1.964 | 0.0495813  | -0.002 | 0.998638  |
| rs10889125 | 1 | 59417116 | 1.867 | 0.0619536  | 0.046  | 0.963043  |
| rs11207546 | 1 | 60413925 | 2.007 | 0.04476    | 0.152  | 0.879562  |
| rs7514565  | 1 | 61442276 | 1.968 | 0.0490795  | 0.191  | 0.848747  |
| rs6587937  | 1 | 62110298 | 1.683 | 0.0923926  | 0.091  | 0.927284  |
| rs1887587  | 1 | 63201577 | 1.369 | 0.171004   | -0.134 | 0.893568  |
| rs2819142  | 1 | 64280779 | 1.131 | 0.258102   | -0.465 | 0.641614  |
| rs12035924 | 1 | 65000767 | 0.772 | 0.440342   | -0.765 | 0.444366  |
| rs12566696 | 1 | 65608909 | 0.627 | 0.53038    | -0.904 | 0.366154  |
| rs521557   | 1 | 66727702 | 0.461 | 0.644573   | -1.017 | 0.309026  |
| rs4655699  | 1 | 67800712 | 0.384 | 0.701074   | -1.155 | 0.247894  |
| rs4437851  | 1 | 68428049 | 0.569 | 0.569203   | -1.017 | 0.309099  |
| rs2048156  | 1 | 69441920 | 0.532 | 0.594421   | -0.723 | 0.469782  |
| rs2815464  | 1 | 69796389 | 0.598 | 0.55017    | -0.649 | 0.516394  |
| rs58173595 | 1 | 70750557 | 0.739 | 0.460008   | -0.57  | 0.568824  |
| rs2782762  | 1 | 71131339 | 0.765 | 0.444533   | -0.519 | 0.603826  |
| rs4650123  | 1 | 72258734 | 0.874 | 0.381979   | -0.291 | 0.771097  |
| rs11210034 | 1 | 73172614 | 0.889 | 0.373886   | -0.278 | 0.780995  |
| rs2255940  | 1 | 74404678 | 0.851 | 0.394861   | -0.202 | 0.840304  |
| rs945795   | 1 | 75785718 | 0.978 | 0.328025   | 0.021  | 0.983011  |
| rs7540736  | 1 | 76933162 | 0.996 | 0.319417   | 0.183  | 0.854813  |
| rs4268394  | 1 | 77295109 | 1.094 | 0.273947   | 0.38   | 0.70386   |
| rs2031496  | 1 | 78527912 | 1.106 | 0.268572   | 0.464  | 0.642303  |
| rs228520   | 1 | 79670379 | 1.128 | 0.259237   | 0.556  | 0.578049  |
| rs12120643 | 1 | 80511950 | 1.015 | 0.310306   | 0.566  | 0.571402  |
| rs7524907  | 1 | 81867479 | 0.989 | 0.322652   | 0.727  | 0.467365  |
| rs12067308 | 1 | 82965883 | 0.965 | 0.334344   | 0.881  | 0.378535  |
| rs6696049  | 1 | 84081556 | 1.073 | 0.283369   | 1      | 0.317388  |
| rs11161436 | 1 | 85206477 | 1.105 | 0.269331   | 1.178  | 0.238889  |
| rs1439130  | 1 | 85458118 | 1.088 | 0.276765   | 1.182  | 0.237323  |
| rs1414602  | 1 | 86606825 | 1.248 | 0.211964   | 1.47   | 0.14155   |
| rs10873830 | 1 | 87803200 | 1.259 | 0.207944   | 1.657  | 0.0974876 |
| rs10801882 | 1 | 88853147 | 1.295 | 0.195213   | 1.889  | 0.0589246 |
| rs6428493  | 1 | 89469075 | 1.268 | 0.204927   | 1.899  | 0.0575295 |
| rs2813741  | 1 | 90537317 | 1.16  | 0.246016   | 1.872  | 0.0612299 |
| rs541728   | 1 | 90992380 | 1.19  | 0.233993   | 1.845  | 0.0650664 |
| rs1077783  | 1 | 92552713 | 1.266 | 0.205681   | 1.818  | 0.0690307 |
| rs236336   | 1 | 94065973 | 1.19  | 0.23397    | 1.763  | 0.0779602 |
| rs698944   | 1 | 95011911 | 0.986 | 0.324148   | 1.6    | 0.109539  |

|               |   |           |       |           |       |             |
|---------------|---|-----------|-------|-----------|-------|-------------|
| rs1463974     | 1 | 96142780  | 0.804 | 0.421116  | 1.482 | 0.138352    |
| rs479424      | 1 | 97286510  | 0.889 | 0.373845  | 1.598 | 0.110089    |
| rs822617      | 1 | 98683104  | 1.16  | 0.246195  | 1.838 | 0.0660624   |
| rs6669861     | 1 | 99896379  | 1.588 | 0.11234   | 2.316 | 0.0205531   |
| rs1009831     | 1 | 100771636 | 1.869 | 0.0616348 | 2.571 | 0.01013     |
| rs12134363    | 1 | 101711964 | 1.883 | 0.0597117 | 2.579 | 0.00990878  |
| rs1385120     | 1 | 102177800 | 1.895 | 0.0580322 | 2.521 | 0.0116924   |
| rs1934709     | 1 | 102968036 | 2.035 | 0.041872  | 2.56  | 0.0104591   |
| rs11164649    | 1 | 103444679 | 2.045 | 0.0408461 | 2.57  | 0.0101743   |
| rs4847150     | 1 | 104478205 | 2.055 | 0.0398331 | 2.612 | 0.00900094  |
| rs56140844    | 1 | 105347101 | 2.097 | 0.036037  | 2.811 | 0.00493989  |
| rs2341706     | 1 | 106075979 | 2.053 | 0.0400671 | 3.049 | 0.00229421  |
| rs4256842     | 1 | 107163979 | 2.064 | 0.0390459 | 3.207 | 0.00134327  |
| rs9435345     | 1 | 107802679 | 2.266 | 0.0234573 | 3.53  | 0.000416259 |
| rs73143       | 1 | 108518870 | 2.232 | 0.0255929 | 3.574 | 0.000351853 |
| rs3736956     | 1 | 109743622 | 2.179 | 0.0293056 | 3.558 | 0.000373618 |
| rs501163      | 1 | 110078434 | 2.103 | 0.0354998 | 3.501 | 0.000463999 |
| Affx-35292376 | 1 | 111171378 | 2.244 | 0.0248194 | 3.665 | 0.000247806 |
| rs2800901     | 1 | 112097666 | 2.148 | 0.0317062 | 3.656 | 0.000256515 |
| rs2483328     | 1 | 112960192 | 1.812 | 0.0699814 | 3.301 | 0.00096226  |
| rs642746      | 1 | 114873168 | 1.874 | 0.0609343 | 3.198 | 0.00138296  |
| rs2156042     | 1 | 116097043 | 1.873 | 0.0611102 | 3.142 | 0.0016784   |
| rs10924081    | 1 | 116935068 | 1.718 | 0.0858692 | 2.901 | 0.00371562  |
| rs2251406     | 1 | 117445365 | 1.708 | 0.0875884 | 2.889 | 0.00386931  |
| rs11803553    | 1 | 118522545 | 1.64  | 0.101036  | 2.749 | 0.00598083  |
| rs2764504     | 1 | 119234198 | 1.756 | 0.0790714 | 2.747 | 0.00602038  |
| rs835574      | 1 | 120463230 | 1.705 | 0.0882845 | 2.556 | 0.0105881   |
| rs17842566    | 1 | 121289002 | 1.677 | 0.0935631 | 2.533 | 0.0113008   |
| rs704984      | 1 | 145471191 | 1.56  | 0.118693  | 2.372 | 0.0176957   |
| rs11239931    | 1 | 146568955 | 1.59  | 0.111919  | 2.358 | 0.0183711   |
| rs7526407     | 1 | 147070609 | 1.596 | 0.110464  | 2.363 | 0.0181083   |
| rs543163      | 1 | 147826275 | 1.606 | 0.108232  | 2.37  | 0.0177827   |
| rs56264419    | 1 | 149043008 | 1.479 | 0.13924   | 2.341 | 0.0192554   |
| rs3118123     | 1 | 150163390 | 1.288 | 0.197694  | 2.192 | 0.0283993   |
| rs7554936     | 1 | 151122489 | 0.854 | 0.393246  | 2.013 | 0.0440876   |
| rs10127622    | 1 | 151468060 | 0.715 | 0.47482   | 2.013 | 0.044092    |
| rs1199153     | 1 | 152457624 | 0.514 | 0.60741   | 1.895 | 0.0580418   |
| rs4845490     | 1 | 152849299 | 0.575 | 0.564961  | 1.98  | 0.0477186   |
| rs6671166     | 1 | 154093825 | 0.76  | 0.447191  | 1.977 | 0.04809     |
| rs4074436     | 1 | 154531910 | 0.766 | 0.443428  | 1.971 | 0.0486763   |
| rs11582072    | 1 | 155477570 | 0.555 | 0.579075  | 1.606 | 0.108373    |
| rs10796961    | 1 | 156556321 | 0.503 | 0.614909  | 1.307 | 0.191054    |
| rs2768744     | 1 | 156872149 | 0.371 | 0.710434  | 1.162 | 0.245372    |
| rs874844      | 1 | 158067047 | 0.368 | 0.713015  | 0.929 | 0.352762    |
| rs2814778     | 1 | 159174683 | 0.174 | 0.862138  | 0.624 | 0.532477    |
| rs6678328     | 1 | 159598533 | 0.247 | 0.804603  | 0.756 | 0.449727    |
| rs4656926     | 1 | 160650913 | 0.726 | 0.467684  | 1.583 | 0.113402    |
| rs4656347     | 1 | 161996062 | 0.719 | 0.471921  | 1.784 | 0.0744267   |
| rs3806366     | 1 | 163115321 | 0.733 | 0.463442  | 2.092 | 0.0364031   |
| rs12079203    | 1 | 163538248 | 0.769 | 0.441633  | 2.13  | 0.0331576   |
| rs10918023    | 1 | 164491792 | 0.759 | 0.447657  | 2.193 | 0.0283013   |
| rs4387163     | 1 | 164995713 | 0.347 | 0.728795  | 2.302 | 0.021324    |
| rs12026024    | 1 | 166161141 | 0.013 | 0.989938  | 2.011 | 0.0443108   |

|            |   |           |        |          |        |           |
|------------|---|-----------|--------|----------|--------|-----------|
| rs1546206  | 1 | 167160515 | -0.241 | 0.809472 | 1.839  | 0.0659058 |
| rs2268548  | 1 | 168352935 | -0.66  | 0.509542 | 1.308  | 0.19083   |
| rs3766117  | 1 | 169527856 | -0.627 | 0.530522 | 1.225  | 0.220548  |
| rs2998167  | 1 | 170243965 | -0.445 | 0.655999 | 1.197  | 0.231118  |
| rs6697175  | 1 | 171417853 | -0.26  | 0.79467  | 0.879  | 0.379627  |
| rs9425309  | 1 | 172386690 | -0.122 | 0.903131 | 0.855  | 0.392823  |
| rs12065033 | 1 | 173579034 | 0.156  | 0.876358 | 0.841  | 0.400221  |
| rs1884994  | 1 | 173950282 | 0.104  | 0.917354 | 0.827  | 0.408085  |
| rs16847670 | 1 | 174958438 | -0.023 | 0.981764 | 0.811  | 0.417206  |
| rs10798415 | 1 | 175724078 | -0.29  | 0.772157 | 0.546  | 0.585203  |
| rs7527035  | 1 | 176435410 | -0.16  | 0.872602 | 0.686  | 0.492871  |
| rs2902095  | 1 | 177156357 | -0.13  | 0.896573 | 0.721  | 0.470768  |
| rs4652291  | 1 | 178028711 | -0.209 | 0.834217 | 0.926  | 0.354702  |
| rs9803716  | 1 | 178952468 | -0.148 | 0.882023 | 1.002  | 0.316414  |
| rs1281410  | 1 | 179813613 | -0.077 | 0.938958 | 0.979  | 0.327335  |
| rs7515944  | 1 | 180492413 | -0.06  | 0.952504 | 1      | 0.317349  |
| rs591650   | 1 | 181384078 | 0.277  | 0.781536 | 1.09   | 0.275551  |
| rs2985435  | 1 | 182274203 | 0.695  | 0.487273 | 1.17   | 0.24193   |
| rs3856123  | 1 | 182756294 | 0.74   | 0.459282 | 1.099  | 0.271892  |
| rs6698088  | 1 | 183958442 | 0.807  | 0.419416 | 1.125  | 0.26077   |
| rs6678278  | 1 | 184410702 | 0.73   | 0.46545  | 1.027  | 0.304444  |
| rs12062862 | 1 | 185622715 | 0.656  | 0.511865 | 1.02   | 0.30752   |
| rs1555494  | 1 | 185886151 | 0.63   | 0.528941 | 1.008  | 0.313366  |
| rs10911976 | 1 | 186964100 | 0.452  | 0.651492 | 0.903  | 0.366709  |
| rs1552999  | 1 | 187278863 | 0.401  | 0.688617 | 0.896  | 0.370222  |
| rs73068734 | 1 | 188792890 | 0.097  | 0.922484 | 0.705  | 0.480849  |
| rs10920813 | 1 | 190820888 | -0.229 | 0.818534 | 0.404  | 0.686222  |
| rs6688496  | 1 | 192005194 | -0.288 | 0.773716 | 0.341  | 0.733274  |
| rs1923949  | 1 | 192547710 | -0.408 | 0.683336 | 0.218  | 0.827594  |
| rs10754083 | 1 | 193784537 | -0.711 | 0.477212 | -0.047 | 0.962796  |
| rs12068912 | 1 | 195280424 | -0.983 | 0.325409 | -0.223 | 0.823572  |
| rs1349566  | 1 | 195923203 | -1.013 | 0.311042 | -0.246 | 0.805331  |
| rs7540922  | 1 | 196533578 | -1.02  | 0.307655 | -0.244 | 0.807454  |
| rs7515671  | 1 | 197438984 | -1.102 | 0.270548 | -0.272 | 0.785951  |
| rs1325189  | 1 | 199236887 | -1.187 | 0.235323 | -0.409 | 0.682275  |
| rs2816949  | 1 | 199997778 | -1.25  | 0.211376 | -0.46  | 0.645164  |
| rs12134496 | 1 | 201217297 | -1.394 | 0.163211 | -0.516 | 0.605838  |
| rs10920333 | 1 | 202081212 | -1.471 | 0.141328 | -0.391 | 0.696132  |
| rs7530895  | 1 | 203260756 | -1.222 | 0.221631 | 0.006  | 0.995171  |
| rs1124777  | 1 | 204438334 | -0.839 | 0.401694 | 0.235  | 0.813848  |
| rs2759281  | 1 | 204866365 | -0.795 | 0.426656 | 0.244  | 0.806855  |
| rs823072   | 1 | 205773652 | -0.414 | 0.678727 | 0.489  | 0.624875  |
| rs57713692 | 1 | 206317209 | -0.085 | 0.932506 | 0.69   | 0.490315  |
| rs291102   | 1 | 207106478 | -0.139 | 0.889504 | 0.549  | 0.582896  |
| rs17047661 | 1 | 207782889 | -0.118 | 0.906449 | 0.596  | 0.55128   |
| rs1781022  | 1 | 208464595 | -0.224 | 0.822485 | 0.379  | 0.704874  |
| rs979698   | 1 | 209697447 | -0.478 | 0.632554 | 0.046  | 0.963565  |
| rs12088691 | 1 | 210419650 | -0.494 | 0.62148  | -0.05  | 0.95975   |
| rs1361193  | 1 | 211383129 | -0.605 | 0.545399 | -0.221 | 0.824747  |
| rs17017772 | 1 | 211747036 | -0.637 | 0.52441  | -0.246 | 0.805811  |
| rs3123539  | 1 | 212815715 | -0.823 | 0.410685 | -0.522 | 0.601672  |
| rs701897   | 1 | 214058159 | -0.841 | 0.400278 | -0.767 | 0.442943  |
| rs335522   | 1 | 214826988 | -0.896 | 0.370224 | -0.87  | 0.384444  |

|            |   |           |        |          |        |          |
|------------|---|-----------|--------|----------|--------|----------|
| rs1319603  | 1 | 215631500 | -0.645 | 0.519193 | -0.804 | 0.42125  |
| rs6604611  | 1 | 216655251 | -0.587 | 0.557092 | -0.709 | 0.478593 |
| rs964347   | 1 | 217511930 | -1.044 | 0.296349 | -1.428 | 0.153158 |
| rs683968   | 1 | 218333601 | -1.26  | 0.207515 | -1.671 | 0.094716 |
| rs631060   | 1 | 219110621 | -1.184 | 0.236573 | -1.618 | 0.105744 |
| rs11118448 | 1 | 220052720 | -1.042 | 0.297216 | -1.477 | 0.139675 |
| rs13375845 | 1 | 220828454 | -0.897 | 0.369851 | -1.35  | 0.177074 |
| rs12091463 | 1 | 221898783 | -1.072 | 0.283512 | -1.351 | 0.176814 |
| rs2291832  | 1 | 222826481 | -1.067 | 0.285833 | -1.289 | 0.197505 |
| rs1222158  | 1 | 223988701 | -1.208 | 0.226944 | -1.435 | 0.151396 |
| rs2489337  | 1 | 225178198 | -0.899 | 0.368734 | -1.079 | 0.280602 |
| rs73127709 | 1 | 225990408 | -0.836 | 0.403263 | -1     | 0.31727  |
| rs1151803  | 1 | 226830381 | -0.669 | 0.503546 | -0.829 | 0.407304 |
| rs2104436  | 1 | 228633794 | -0.504 | 0.614025 | -0.795 | 0.426883 |
| rs342780   | 1 | 229318518 | -0.353 | 0.723926 | -0.674 | 0.500479 |
| rs6587361  | 1 | 230019048 | -0.406 | 0.68501  | -0.662 | 0.507999 |
| rs1326889  | 1 | 230862998 | -0.252 | 0.801128 | -0.584 | 0.559113 |
| rs1406869  | 1 | 231313859 | -0.36  | 0.718918 | -0.682 | 0.495521 |
| rs9661417  | 1 | 232385051 | -0.508 | 0.61162  | -0.837 | 0.402663 |
| rs56169225 | 1 | 233022124 | -0.486 | 0.627146 | -0.74  | 0.459027 |
| rs9435541  | 1 | 234164879 | -0.3   | 0.764534 | -0.377 | 0.705854 |
| rs6586395  | 1 | 234648819 | -0.248 | 0.803788 | -0.307 | 0.75868  |
| rs12059431 | 1 | 235771589 | -0.188 | 0.850529 | -0.245 | 0.806233 |
| rs630101   | 1 | 236772416 | 0.092  | 0.926934 | -0.113 | 0.909963 |
| rs2485579  | 1 | 237271632 | 0.135  | 0.892904 | -0.131 | 0.89545  |
| rs618451   | 1 | 238243608 | 0.171  | 0.864306 | -0.003 | 0.997674 |
| rs9428802  | 1 | 239144913 | 0.404  | 0.685936 | 0.247  | 0.804708 |
| rs10925911 | 1 | 239708312 | 0.586  | 0.557542 | 0.41   | 0.682146 |
| rs7525142  | 1 | 240742905 | 0.656  | 0.511932 | 0.513  | 0.607614 |
| rs28645739 | 1 | 241272653 | 0.652  | 0.51463  | 0.425  | 0.670498 |
| rs12405776 | 1 | 242431557 | -0.056 | 0.955432 | -0.242 | 0.80877  |
| rs2502338  | 1 | 243069808 | -0.363 | 0.716562 | -0.59  | 0.555332 |
| rs10927081 | 1 | 243994216 | -0.463 | 0.643086 | -0.657 | 0.511429 |
| rs73127483 | 1 | 244980554 | -0.953 | 0.340482 | -1.205 | 0.228316 |
| rs4654168  | 1 | 246078476 | -0.365 | 0.715405 | -1.283 | 0.199323 |
| rs3120687  | 1 | 246691544 | -0.137 | 0.891355 | -1.271 | 0.203721 |
| rs3862188  | 1 | 247865773 | 0.216  | 0.8291   | -1.132 | 0.257681 |
| rs7527770  | 1 | 248227201 | 0.205  | 0.837356 | -1.089 | 0.276177 |
| rs6587761  | 1 | 249198060 | 0.381  | 0.703487 | -1.103 | 0.27007  |
| rs384526   | 2 | 193882    | -1.518 | 0.129134 | -1.044 | 0.296682 |
| rs1514680  | 2 | 1396971   | -1.33  | 0.183678 | -0.83  | 0.406816 |
| rs35548094 | 2 | 2427700   | -1.379 | 0.167761 | -1.028 | 0.303791 |
| rs9309717  | 2 | 3495078   | -1.197 | 0.231446 | -0.978 | 0.328029 |
| rs10202915 | 2 | 4747638   | -0.86  | 0.389946 | -0.655 | 0.512427 |
| rs12692331 | 2 | 7087870   | -0.266 | 0.790406 | 0.048  | 0.961473 |
| rs798443   | 2 | 7968275   | -0.177 | 0.859795 | 0.184  | 0.853926 |
| rs1054765  | 2 | 8811354   | -0.135 | 0.892277 | 0.342  | 0.731991 |
| rs1344185  | 2 | 9290324   | -0.151 | 0.880018 | 0.406  | 0.684789 |
| rs6705540  | 2 | 10520520  | 0.256  | 0.797976 | 0.652  | 0.514234 |
| rs6432174  | 2 | 11274019  | 0.328  | 0.74288  | 0.572  | 0.567238 |
| rs11694156 | 2 | 12384394  | -0.201 | 0.840535 | -0.312 | 0.755079 |
| rs311992   | 2 | 13492068  | 0.182  | 0.855657 | -0.073 | 0.94215  |
| rs61083767 | 2 | 13961735  | 0.303  | 0.761788 | -0.031 | 0.975479 |

|            |   |          |        |          |        |           |
|------------|---|----------|--------|----------|--------|-----------|
| rs7421394  | 2 | 14756349 | 0.294  | 0.769121 | -0.119 | 0.905061  |
| rs6733850  | 2 | 15930951 | 0.524  | 0.600236 | -0.291 | 0.771278  |
| rs810066   | 2 | 16889372 | 1.121  | 0.262184 | 0.154  | 0.877813  |
| rs60609351 | 2 | 17480130 | 1.105  | 0.269285 | 0.221  | 0.825099  |
| rs1489689  | 2 | 18661982 | 0.838  | 0.402159 | 0.14   | 0.888586  |
| rs6725833  | 2 | 19303275 | 0.707  | 0.479696 | -0.02  | 0.984177  |
| rs9306885  | 2 | 19988832 | 0.718  | 0.472547 | 0.003  | 0.997542  |
| rs11894171 | 2 | 21881282 | 0.219  | 0.826385 | -0.531 | 0.595244  |
| rs4665518  | 2 | 23020557 | 0.112  | 0.911016 | -0.726 | 0.467837  |
| rs11125053 | 2 | 23701104 | 0.297  | 0.766823 | -0.611 | 0.541302  |
| rs2119997  | 2 | 24692639 | 0.293  | 0.769768 | -0.67  | 0.502938  |
| rs6546148  | 2 | 25625005 | 0.29   | 0.771607 | -0.7   | 0.483863  |
| rs7592657  | 2 | 26755397 | 0.395  | 0.692933 | -0.778 | 0.436774  |
| rs7575245  | 2 | 27527321 | 0.224  | 0.822755 | -0.76  | 0.447122  |
| rs1039822  | 2 | 28656193 | 0.253  | 0.800322 | -0.711 | 0.476905  |
| rs2631990  | 2 | 29902390 | 0.025  | 0.980119 | -0.684 | 0.493876  |
| rs6548031  | 2 | 30984671 | -0.104 | 0.917366 | -0.635 | 0.525323  |
| rs6706156  | 2 | 31380955 | -0.19  | 0.849046 | -0.743 | 0.457191  |
| rs6752375  | 2 | 32247942 | -0.483 | 0.629358 | -1.008 | 0.313423  |
| rs219076   | 2 | 33280234 | -0.677 | 0.498422 | -1.12  | 0.262753  |
| rs13391432 | 2 | 34136493 | -0.936 | 0.349213 | -1.416 | 0.156691  |
| rs11124405 | 2 | 35188011 | -0.91  | 0.362827 | -1.255 | 0.209459  |
| rs10168157 | 2 | 35557749 | -0.886 | 0.375877 | -1.212 | 0.225359  |
| rs6752813  | 2 | 36574673 | -0.828 | 0.407852 | -1.052 | 0.292716  |
| rs4670605  | 2 | 36996398 | -0.77  | 0.44154  | -1.104 | 0.26939   |
| rs6544109  | 2 | 38026026 | -0.437 | 0.661973 | -0.926 | 0.354605  |
| rs17022085 | 2 | 38356620 | -0.281 | 0.778939 | -0.742 | 0.457858  |
| rs11124663 | 2 | 39452861 | -0.702 | 0.482642 | -1.171 | 0.241584  |
| rs4670985  | 2 | 40140529 | -1.002 | 0.316539 | -1.296 | 0.194848  |
| rs72789501 | 2 | 41317885 | -1.235 | 0.216813 | -1.349 | 0.177329  |
| rs12473179 | 2 | 41820688 | -1.199 | 0.230695 | -1.206 | 0.227772  |
| rs6544588  | 2 | 42919911 | -1.104 | 0.269687 | -1.102 | 0.270643  |
| rs13420649 | 2 | 43463637 | -1.122 | 0.262016 | -1.089 | 0.27614   |
| rs6713195  | 2 | 44598785 | -1.238 | 0.215712 | -1.146 | 0.251894  |
| rs6740875  | 2 | 45117702 | -1.324 | 0.185554 | -1.17  | 0.242177  |
| rs3924521  | 2 | 45995181 | -1.072 | 0.283515 | -0.968 | 0.333142  |
| rs59862329 | 2 | 46523463 | -1.076 | 0.281719 | -1.085 | 0.278076  |
| rs7598848  | 2 | 47487552 | -0.895 | 0.370558 | -1.004 | 0.315513  |
| rs11895219 | 2 | 48472968 | -0.754 | 0.450941 | -0.911 | 0.362533  |
| rs11891861 | 2 | 49156580 | -0.607 | 0.543533 | -0.867 | 0.385711  |
| rs1568287  | 2 | 49909547 | -0.496 | 0.61977  | -0.869 | 0.384935  |
| rs13397180 | 2 | 50565462 | -0.468 | 0.639564 | -0.886 | 0.375404  |
| rs62140816 | 2 | 52489021 | -0.271 | 0.786246 | -0.885 | 0.37601   |
| rs1357204  | 2 | 53609363 | -0.269 | 0.787961 | -1.042 | 0.297461  |
| rs4131218  | 2 | 54610555 | -0.205 | 0.837558 | -1.237 | 0.216014  |
| rs930493   | 2 | 55058198 | -0.097 | 0.922755 | -1.261 | 0.207482  |
| rs2868440  | 2 | 56158646 | 0.28   | 0.779314 | -1.193 | 0.232795  |
| rs7574093  | 2 | 56907253 | 0.344  | 0.730531 | -1.374 | 0.169463  |
| rs6731365  | 2 | 57935873 | 0.245  | 0.806316 | -1.479 | 0.139265  |
| rs6719889  | 2 | 58237076 | 0.2    | 0.841143 | -1.545 | 0.122259  |
| rs7570921  | 2 | 59207605 | 0.026  | 0.979637 | -1.637 | 0.101556  |
| rs7588439  | 2 | 59731570 | -0.102 | 0.918684 | -1.691 | 0.0909303 |
| rs7567242  | 2 | 60553143 | -0.323 | 0.746666 | -1.549 | 0.121441  |

|             |   |           |        |           |        |           |
|-------------|---|-----------|--------|-----------|--------|-----------|
| rs4643526   | 2 | 61184651  | -0.34  | 0.733973  | -1.511 | 0.130841  |
| rs13396724  | 2 | 62300715  | -0.401 | 0.688177  | -1.412 | 0.157822  |
| rs6545939   | 2 | 62674239  | -0.489 | 0.625092  | -1.366 | 0.171945  |
| rs6732438   | 2 | 64735823  | -0.49  | 0.624282  | -1.271 | 0.203738  |
| rs6743585   | 2 | 65555720  | -0.438 | 0.661047  | -1.172 | 0.241028  |
| rs17032045  | 2 | 66639190  | -0.443 | 0.65762   | -1.337 | 0.181305  |
| rs7566143   | 2 | 66942643  | -0.354 | 0.723481  | -1.301 | 0.193192  |
| rs7608093   | 2 | 67891967  | -0.151 | 0.879683  | -1.246 | 0.212599  |
| rs10182268  | 2 | 69065316  | 0.018  | 0.985787  | -1.175 | 0.240173  |
| rs6722390   | 2 | 70176616  | 0.211  | 0.833133  | -1.093 | 0.274213  |
| rs72897942  | 2 | 71194556  | 0.606  | 0.54477   | -1.017 | 0.309198  |
| rs10190766  | 2 | 72366818  | 0.461  | 0.644597  | -0.898 | 0.369381  |
| rs879511    | 2 | 73179990  | 0.618  | 0.536637  | -0.846 | 0.397321  |
| rs2268421   | 2 | 74654087  | 1.084  | 0.278486  | -0.915 | 0.359937  |
| rs11691947  | 2 | 74920823  | 1.157  | 0.247412  | -0.862 | 0.388747  |
| rs7563081   | 2 | 76003608  | 0.482  | 0.62976   | -0.885 | 0.376216  |
| rs17702641  | 2 | 76431277  | 0.432  | 0.665574  | -0.843 | 0.399327  |
| rs10209662  | 2 | 77503661  | 0.478  | 0.632695  | -0.934 | 0.350259  |
| rs17566368  | 2 | 78516288  | 0.641  | 0.521813  | -0.901 | 0.367521  |
| rs1368960   | 2 | 79403832  | 0.919  | 0.358006  | -0.72  | 0.471588  |
| rs17020512  | 2 | 81830955  | 2.033  | 0.0420597 | 0.116  | 0.907277  |
| rs6731289   | 2 | 82892794  | 2.214  | 0.0268066 | 0.331  | 0.740879  |
| rs4832067   | 2 | 84330303  | 2.228  | 0.0258786 | 0.415  | 0.678373  |
| rs1347039   | 2 | 85459880  | 2.274  | 0.0229686 | 0.548  | 0.583453  |
| rs1025104   | 2 | 86350664  | 2.256  | 0.0240805 | 0.744  | 0.456759  |
| rs60553565  | 2 | 87041094  | 2.228  | 0.0258496 | 0.843  | 0.399298  |
| rs142097611 | 2 | 87781057  | 2.04   | 0.0413695 | 0.848  | 0.396583  |
| rs6728586   | 2 | 88837444  | 1.484  | 0.137834  | 0.806  | 0.420185  |
| rs2555958   | 2 | 90065400  | 1.396  | 0.16258   | 0.885  | 0.376363  |
| rs61106114  | 2 | 92170087  | 1.308  | 0.190895  | 0.99   | 0.322395  |
| rs186652886 | 2 | 95326293  | 1.055  | 0.2914    | 1.11   | 0.266882  |
| rs11164117  | 2 | 95680267  | 1.026  | 0.304685  | 1.123  | 0.261358  |
| rs62153700  | 2 | 96581338  | 0.936  | 0.349143  | 1.14   | 0.25448   |
| rs1257010   | 2 | 97633814  | 0.828  | 0.407888  | 1.128  | 0.259233  |
| rs1463174   | 2 | 98320186  | 0.804  | 0.42138   | 1.127  | 0.259814  |
| rs9308814   | 2 | 99263400  | 0.759  | 0.447738  | 1.223  | 0.22142   |
| rs744145    | 2 | 100190049 | 0.773  | 0.439277  | 1.262  | 0.206774  |
| rs3791358   | 2 | 101031865 | 0.701  | 0.483436  | 1.205  | 0.228119  |
| rs3849376   | 2 | 101443468 | 0.72   | 0.471547  | 1.203  | 0.229129  |
| rs4850988   | 2 | 102337307 | 0.741  | 0.458961  | 1.23   | 0.218563  |
| rs13020778  | 2 | 102784574 | 0.718  | 0.472553  | 1.179  | 0.238556  |
| rs1038328   | 2 | 103602505 | 0.837  | 0.402758  | 1.343  | 0.179378  |
| rs10166683  | 2 | 104754379 | 0.857  | 0.391623  | 1.568  | 0.116889  |
| rs10171578  | 2 | 105266464 | 0.921  | 0.356796  | 1.629  | 0.103227  |
| rs12468682  | 2 | 106068297 | 0.959  | 0.337724  | 1.667  | 0.0955195 |
| rs11691799  | 2 | 106961745 | 1.028  | 0.304014  | 1.66   | 0.096924  |
| rs6542725   | 2 | 108194023 | 1.064  | 0.287108  | 1.641  | 0.100708  |
| rs1478517   | 2 | 109510937 | 0.938  | 0.348078  | 1.515  | 0.129756  |
| rs11240785  | 2 | 110458618 | 0.668  | 0.504133  | 1.426  | 0.153769  |
| rs13426054  | 2 | 111477966 | 0.693  | 0.488336  | 1.73   | 0.0835947 |
| rs2166863   | 2 | 112383553 | 0.498  | 0.61866   | 1.884  | 0.0596174 |
| rs4089089   | 2 | 114846282 | 0.548  | 0.583543  | 2.077  | 0.0377703 |
| rs13010082  | 2 | 116042354 | 0.545  | 0.585792  | 1.965  | 0.0493841 |

|               |   |           |        |             |       |           |
|---------------|---|-----------|--------|-------------|-------|-----------|
| rs4289208     | 2 | 116737687 | 0.474  | 0.635512    | 1.816 | 0.0693183 |
| rs1437430     | 2 | 117766337 | 0.602  | 0.547401    | 1.865 | 0.0622121 |
| rs3860421     | 2 | 118960711 | 0.735  | 0.462046    | 2.009 | 0.0445629 |
| rs2579629     | 2 | 120227762 | 0.688  | 0.491481    | 1.929 | 0.0537522 |
| rs874816      | 2 | 121264471 | 0.727  | 0.467143    | 1.948 | 0.0514502 |
| rs13404741    | 2 | 121831765 | 0.955  | 0.339539    | 1.552 | 0.120765  |
| rs10165357    | 2 | 123252034 | 1.137  | 0.255684    | 1.436 | 0.150945  |
| rs7567573     | 2 | 124444715 | 1.193  | 0.232774    | 1.325 | 0.185104  |
| rs7605407     | 2 | 125586900 | 1.331  | 0.183105    | 1.147 | 0.251221  |
| rs60944376    | 2 | 126735652 | 1.368  | 0.1712      | 0.884 | 0.376704  |
| rs6733255     | 2 | 127662386 | 1.383  | 0.166614    | 0.772 | 0.440275  |
| rs2438012     | 2 | 128709520 | 1.319  | 0.187259    | 0.582 | 0.560827  |
| rs6745289     | 2 | 129020861 | 1.405  | 0.15997     | 0.612 | 0.540704  |
| rs1025819     | 2 | 130092701 | 1.453  | 0.146153    | 0.61  | 0.542129  |
| rs4407201     | 2 | 130522894 | 1.324  | 0.185605    | 0.557 | 0.57782   |
| rs2625051     | 2 | 131512850 | 0.937  | 0.34895     | 0.525 | 0.599665  |
| rs890058      | 2 | 131868107 | 0.779  | 0.436075    | 0.466 | 0.640887  |
| rs4621214     | 2 | 132881416 | 0.394  | 0.693869    | 0.308 | 0.75791   |
| rs7579800     | 2 | 133396489 | 0.23   | 0.817748    | 0.31  | 0.756563  |
| rs7601482     | 2 | 134604836 | -0.123 | 0.902467    | 0.395 | 0.692486  |
| rs10153536    | 2 | 134924154 | -0.297 | 0.766316    | 0.387 | 0.698522  |
| Affx-17900027 | 2 | 135911422 | -0.94  | 0.347203    | 0.324 | 0.74626   |
| rs1446585     | 2 | 136407479 | -0.932 | 0.351106    | 0.332 | 0.739957  |
| rs11687599    | 2 | 137178771 | -0.444 | 0.656959    | 0.43  | 0.666889  |
| rs7355522     | 2 | 138129626 | 0.495  | 0.620676    | 0.669 | 0.503288  |
| rs12691926    | 2 | 138510418 | 1.082  | 0.279146    | 0.824 | 0.409751  |
| rs6705862     | 2 | 139393369 | 1.889  | 0.0589123   | 1.005 | 0.314925  |
| rs72975103    | 2 | 140481888 | 2.426  | 0.0152772   | 1.17  | 0.242201  |
| rs7609317     | 2 | 140910382 | 2.672  | 0.00753095  | 1.335 | 0.18195   |
| rs10186572    | 2 | 141795269 | 3.233  | 0.00122567  | 1.657 | 0.097605  |
| rs11901499    | 2 | 142172028 | 3.355  | 0.000793756 | 1.703 | 0.0885428 |
| rs13003495    | 2 | 143268255 | 3.908  | 0.000093016 | 1.568 | 0.116771  |
| rs12691673    | 2 | 144092133 | 4.224  | 2.39884E-05 | 1.499 | 0.133995  |
| rs1035822     | 2 | 145255778 | 4.344  | 1.39831E-05 | 1.396 | 0.162759  |
| rs1484930     | 2 | 146259628 | 4.364  | 1.27583E-05 | 1.23  | 0.218631  |
| rs12467509    | 2 | 146913332 | 4.445  | 8.79177E-06 | 1.206 | 0.22796   |
| rs1515263     | 2 | 147750175 | 4.403  | 1.06646E-05 | 1.205 | 0.228096  |
| rs6757820     | 2 | 148279693 | 4.382  | 1.17546E-05 | 1.202 | 0.229284  |
| rs1979038     | 2 | 149210898 | 4.316  | 1.58545E-05 | 1.226 | 0.220158  |
| rs4667419     | 2 | 150443813 | 4.036  | 5.43314E-05 | 1.323 | 0.185929  |
| rs1446242     | 2 | 151005314 | 3.884  | 0.000102958 | 1.279 | 0.200793  |
| rs289876      | 2 | 152067557 | 3.636  | 0.000277265 | 1.025 | 0.305194  |
| rs6733811     | 2 | 152546145 | 3.518  | 0.000434504 | 0.938 | 0.348228  |
| rs11892925    | 2 | 153434576 | 3.359  | 0.000782022 | 0.777 | 0.437067  |
| rs1530037     | 2 | 154410388 | 3.241  | 0.00118995  | 0.65  | 0.515906  |
| rs6738659     | 2 | 154826521 | 3.184  | 0.00145154  | 0.62  | 0.535483  |
| rs2591138     | 2 | 155718113 | 2.756  | 0.00584463  | 0.391 | 0.696143  |
| rs10206111    | 2 | 156892522 | 2.357  | 0.0184085   | 0.226 | 0.821193  |
| rs41416848    | 2 | 158126458 | 2.1    | 0.0357613   | 0.28  | 0.779574  |
| rs10497191    | 2 | 158667217 | 2.087  | 0.0368459   | 0.239 | 0.81134   |
| rs59201434    | 2 | 159516667 | 2.159  | 0.030858    | 0.412 | 0.680675  |
| rs7597518     | 2 | 160945648 | 2.176  | 0.0295768   | 0.675 | 0.49965   |
| rs17705608    | 2 | 161991197 | 2.157  | 0.0310348   | 0.682 | 0.494977  |



|            |   |           |       |           |        |           |
|------------|---|-----------|-------|-----------|--------|-----------|
| rs6715889  | 2 | 164861003 | 1.963 | 0.0496073 | 0.555  | 0.579165  |
| rs1858102  | 2 | 165737444 | 1.96  | 0.0500296 | 0.537  | 0.590938  |
| rs2045692  | 2 | 166807600 | 1.78  | 0.0751091 | 0.207  | 0.835759  |
| rs7596044  | 2 | 167724626 | 1.609 | 0.107597  | -0.036 | 0.971144  |
| rs11691034 | 2 | 168518206 | 1.592 | 0.111352  | 0.03   | 0.975832  |
| rs11680688 | 2 | 169436023 | 1.359 | 0.174121  | -0.126 | 0.899683  |
| rs13404242 | 2 | 169821132 | 1.324 | 0.18546   | -0.173 | 0.86243   |
| rs13034165 | 2 | 170736720 | 1.108 | 0.268054  | -0.232 | 0.816294  |
| rs34020565 | 2 | 171380643 | 0.808 | 0.419272  | -0.518 | 0.604173  |
| rs2542931  | 2 | 172418126 | 0.578 | 0.563445  | -0.759 | 0.448064  |
| rs7608333  | 2 | 173249050 | 0.408 | 0.683134  | -0.945 | 0.344786  |
| rs12466967 | 2 | 174344080 | 0.317 | 0.75101   | -1.069 | 0.28529   |
| rs60234671 | 2 | 175195860 | 0.583 | 0.559648  | -0.727 | 0.467038  |
| rs1986035  | 2 | 176305688 | 0.688 | 0.491138  | -0.601 | 0.548158  |
| rs868179   | 2 | 177549497 | 0.878 | 0.379969  | -0.589 | 0.555591  |
| rs4893962  | 2 | 178421106 | 0.879 | 0.379184  | -0.602 | 0.547402  |
| rs10186547 | 2 | 180213669 | 0.86  | 0.389524  | -0.935 | 0.34957   |
| rs2056788  | 2 | 180973167 | 0.86  | 0.389753  | -0.922 | 0.356553  |
| rs56378630 | 2 | 181710499 | 0.867 | 0.38578   | -0.94  | 0.346972  |
| rs1528030  | 2 | 182550959 | 0.776 | 0.437523  | -1.008 | 0.313628  |
| rs288345   | 2 | 183666932 | 0.921 | 0.356882  | -0.914 | 0.360554  |
| rs1534207  | 2 | 185018296 | 0.894 | 0.371248  | -1.011 | 0.311972  |
| rs4667010  | 2 | 185944619 | 1.011 | 0.311888  | -0.926 | 0.35457   |
| rs1345931  | 2 | 186337702 | 1.058 | 0.289932  | -0.897 | 0.369462  |
| rs9333290  | 2 | 187519338 | 1.161 | 0.245517  | -0.804 | 0.421255  |
| rs6737660  | 2 | 188136191 | 1.207 | 0.22726   | -0.786 | 0.432092  |
| rs12469465 | 2 | 188800394 | 1.35  | 0.17701   | -0.707 | 0.479287  |
| rs7424137  | 2 | 189883644 | 1.526 | 0.127015  | -0.638 | 0.523711  |
| rs6756571  | 2 | 190505697 | 1.466 | 0.142716  | -0.638 | 0.523393  |
| rs887695   | 2 | 191493166 | 1.419 | 0.155884  | -0.58  | 0.562007  |
| rs34460997 | 2 | 192247808 | 1.417 | 0.156425  | -0.375 | 0.707623  |
| rs6710083  | 2 | 192772592 | 1.331 | 0.183065  | -0.246 | 0.805834  |
| rs13009976 | 2 | 193850013 | 1.066 | 0.286638  | -0.323 | 0.746821  |
| rs6434598  | 2 | 194136990 | 1.06  | 0.288925  | -0.321 | 0.748345  |
| rs2360090  | 2 | 195344783 | 1.093 | 0.274541  | -0.279 | 0.779869  |
| rs891522   | 2 | 195828622 | 1.102 | 0.270414  | -0.222 | 0.824178  |
| rs6434811  | 2 | 196866420 | 1.255 | 0.209498  | 0.197  | 0.844063  |
| rs4341955  | 2 | 197404714 | 1.231 | 0.218371  | 0.153  | 0.878009  |
| rs13392750 | 2 | 198143381 | 1.231 | 0.218176  | 0.132  | 0.894676  |
| rs7570678  | 2 | 198965751 | 1.25  | 0.211449  | 0.177  | 0.859249  |
| rs7557687  | 2 | 200159131 | 1.242 | 0.214107  | 0.444  | 0.657102  |
| rs7572473  | 2 | 200634917 | 1.257 | 0.208642  | 0.48   | 0.631489  |
| rs2247030  | 2 | 201560605 | 1.326 | 0.184927  | 0.488  | 0.625335  |
| rs7595229  | 2 | 202799297 | 1.487 | 0.136905  | 0.468  | 0.639438  |
| rs6736678  | 2 | 203212305 | 1.542 | 0.123167  | 0.474  | 0.63584   |
| rs2247197  | 2 | 204306433 | 1.414 | 0.157481  | 0.427  | 0.66962   |
| rs13418503 | 2 | 205117464 | 1.438 | 0.150367  | 0.512  | 0.60854   |
| rs7573626  | 2 | 206343866 | 1.49  | 0.136177  | 0.919  | 0.358138  |
| rs1362663  | 2 | 206769589 | 1.432 | 0.152189  | 0.936  | 0.349285  |
| rs1920047  | 2 | 208014898 | 1.629 | 0.103413  | 1.184  | 0.236482  |
| rs4675743  | 2 | 209087335 | 1.688 | 0.0914981 | 1.281  | 0.200105  |
| rs16842895 | 2 | 210308543 | 1.719 | 0.0856541 | 1.308  | 0.191023  |
| rs1473636  | 2 | 212882190 | 2.167 | 0.0302565 | 1.816  | 0.0694375 |

|            |   |           |        |           |        |             |
|------------|---|-----------|--------|-----------|--------|-------------|
| rs920525   | 2 | 213986695 | 1.982  | 0.0475215 | 1.831  | 0.0671033   |
| rs13420690 | 2 | 215235867 | 1.647  | 0.0995682 | 1.496  | 0.13458     |
| rs11695198 | 2 | 216566444 | 1.382  | 0.167074  | 1.07   | 0.284442    |
| rs28556275 | 2 | 217403458 | 0.893  | 0.371674  | 0.46   | 0.645606    |
| rs10173363 | 2 | 217984660 | 1.056  | 0.290928  | 0.61   | 0.541674    |
| rs735061   | 2 | 218808575 | 0.972  | 0.330891  | 0.583  | 0.560086    |
| rs6731385  | 2 | 219698143 | 0.864  | 0.38778   | 0.263  | 0.792548    |
| rs74271114 | 2 | 220201272 | 0.803  | 0.422174  | 0.265  | 0.791353    |
| rs1477430  | 2 | 222607569 | 1.17   | 0.241886  | 0.752  | 0.452326    |
| rs4674659  | 2 | 223362480 | 1.212  | 0.225479  | 0.657  | 0.511447    |
| rs744396   | 2 | 224570781 | 1.007  | 0.313871  | 0.547  | 0.58423     |
| rs16865548 | 2 | 224947253 | 1.174  | 0.240568  | 0.592  | 0.554058    |
| rs13405715 | 2 | 225864481 | 1.199  | 0.230704  | 0.595  | 0.551951    |
| rs11903376 | 2 | 226683986 | 1.315  | 0.188628  | 0.712  | 0.476209    |
| rs2251692  | 2 | 227589780 | 1.608  | 0.10778   | 0.944  | 0.345357    |
| rs73082223 | 2 | 227973892 | 1.562  | 0.118246  | 0.739  | 0.459628    |
| rs7585858  | 2 | 229079715 | 1.101  | 0.270693  | 0.143  | 0.886273    |
| rs6735031  | 2 | 230283310 | 0.591  | 0.554262  | -0.24  | 0.810013    |
| rs4973342  | 2 | 231532555 | 0.237  | 0.812471  | -0.388 | 0.698254    |
| rs6719593  | 2 | 232198327 | 0.075  | 0.94043   | -0.34  | 0.73375     |
| rs6738099  | 2 | 233162120 | -0.136 | 0.89216   | -0.478 | 0.632314    |
| rs9288684  | 2 | 233968153 | -0.56  | 0.57521   | -0.579 | 0.562885    |
| rs4663990  | 2 | 234862040 | -0.981 | 0.326695  | -0.447 | 0.655104    |
| rs9287582  | 2 | 235922146 | -0.562 | 0.574314  | -0.028 | 0.977608    |
| rs57088602 | 2 | 236294462 | -0.404 | 0.685872  | 0.075  | 0.94049     |
| rs61197218 | 2 | 237209197 | -0.11  | 0.912353  | 0.517  | 0.605265    |
| rs6758782  | 2 | 238336789 | -0.067 | 0.94644   | 0.455  | 0.649358    |
| rs28497373 | 2 | 239417840 | 0.093  | 0.925831  | 0.343  | 0.731856    |
| rs12479184 | 2 | 240435434 | 0.112  | 0.910962  | 0.023  | 0.982048    |
| rs10197199 | 2 | 241002013 | 0.156  | 0.875727  | -0.141 | 0.887735    |
| rs740393   | 2 | 242065498 | 0.438  | 0.661186  | -0.071 | 0.943458    |
| rs6437263  | 2 | 242470674 | 0.424  | 0.671347  | -0.138 | 0.890195    |
| rs9826534  | 3 | 669478    | 0.069  | 0.944844  | 1.239  | 0.215267    |
| rs155409   | 3 | 1355266   | 0.04   | 0.967897  | 1.21   | 0.226226    |
| rs9310592  | 3 | 1982593   | -0.225 | 0.821765  | 1.264  | 0.206391    |
| rs2675291  | 3 | 2751953   | -0.246 | 0.806042  | 1.374  | 0.169417    |
| rs6808651  | 3 | 3911145   | -0.196 | 0.844453  | 1.412  | 0.157894    |
| rs2639801  | 3 | 4662497   | -0.497 | 0.619461  | 1.079  | 0.280747    |
| rs1811510  | 3 | 5775231   | -0.211 | 0.833009  | 1.393  | 0.163469    |
| rs7624349  | 3 | 6764063   | 0.187  | 0.851988  | 2.129  | 0.03325     |
| rs7646099  | 3 | 7079183   | 0.113  | 0.909785  | 2.235  | 0.0253978   |
| rs6773116  | 3 | 8243455   | 0.581  | 0.561323  | 2.845  | 0.00443721  |
| rs13089112 | 3 | 8827669   | 0.801  | 0.423069  | 3.012  | 0.00259306  |
| rs2302786  | 3 | 9979660   | 1.729  | 0.0837226 | 3.504  | 0.000459118 |
| rs11719375 | 3 | 10706597  | 1.998  | 0.0456858 | 3.703  | 0.000212782 |
| rs13060776 | 3 | 11638316  | 1.965  | 0.0493678 | 3.662  | 0.000250304 |
| rs7627605  | 3 | 12399270  | 1.862  | 0.0626651 | 3.481  | 0.000498874 |
| rs6442360  | 3 | 13279578  | 2.016  | 0.0438083 | 3.534  | 0.000408697 |
| rs4596126  | 3 | 13659897  | 2.031  | 0.0422183 | 3.423  | 0.000619604 |
| rs294607   | 3 | 14844637  | 2.199  | 0.0278776 | 3.177  | 0.00148776  |
| rs9833671  | 3 | 16237372  | 2.337  | 0.0194415 | 2.735  | 0.0062374   |
| rs56727898 | 3 | 17156101  | 2.518  | 0.011815  | 2.57   | 0.0101643   |
| rs12630303 | 3 | 18392551  | 2.482  | 0.0130577 | 2.474  | 0.0133746   |

|            |   |          |        |           |       |           |
|------------|---|----------|--------|-----------|-------|-----------|
| rs74427203 | 3 | 19315008 | 2.512  | 0.0120206 | 2.47  | 0.013522  |
| rs60579573 | 3 | 19854876 | 2.512  | 0.012004  | 2.415 | 0.0157161 |
| rs1497516  | 3 | 21065354 | 2.426  | 0.0152683 | 2.166 | 0.0303172 |
| rs9879526  | 3 | 22022816 | 2.205  | 0.02748   | 1.862 | 0.0625899 |
| rs9812616  | 3 | 23237608 | 2.048  | 0.0405361 | 1.631 | 0.102901  |
| rs6550801  | 3 | 23843620 | 2.082  | 0.0373822 | 1.499 | 0.133813  |
| rs7610607  | 3 | 24904904 | 2.311  | 0.0208408 | 1.527 | 0.126855  |
| rs2035695  | 3 | 25834402 | 2.27   | 0.0232256 | 0.96  | 0.337126  |
| rs6551072  | 3 | 26245585 | 2.257  | 0.024027  | 0.879 | 0.379562  |
| rs533175   | 3 | 27361432 | 2.147  | 0.0318065 | 0.802 | 0.422491  |
| rs9854207  | 3 | 27614316 | 2.033  | 0.0420663 | 0.75  | 0.453234  |
| rs7633531  | 3 | 28828525 | 1.154  | 0.248515  | 0.381 | 0.702994  |
| rs2197896  | 3 | 30032530 | 0.894  | 0.37136   | 0.244 | 0.807072  |
| rs9827386  | 3 | 30973014 | 0.917  | 0.358996  | 0.27  | 0.787075  |
| rs7619670  | 3 | 31386232 | 0.888  | 0.374363  | 0.285 | 0.775959  |
| rs347134   | 3 | 32439785 | 1.144  | 0.25278   | 0.642 | 0.521008  |
| rs1599772  | 3 | 32923426 | 1.37   | 0.170749  | 0.891 | 0.372985  |
| rs7626857  | 3 | 33926125 | 1.507  | 0.131733  | 1.267 | 0.205294  |
| rs7644117  | 3 | 35922177 | 1.709  | 0.0873611 | 1.298 | 0.194434  |
| rs747314   | 3 | 36377812 | 1.643  | 0.100339  | 1.178 | 0.23895   |
| rs9853781  | 3 | 37598871 | 1.375  | 0.16915   | 1.062 | 0.288274  |
| rs2370840  | 3 | 38529825 | 1.233  | 0.217477  | 0.782 | 0.434185  |
| rs7630022  | 3 | 39115494 | 1.122  | 0.261996  | 0.736 | 0.46179   |
| rs6798380  | 3 | 40364473 | 1.23   | 0.21888   | 0.861 | 0.389222  |
| rs4246665  | 3 | 41305804 | 1.458  | 0.144977  | 1.118 | 0.263597  |
| rs9836748  | 3 | 41747745 | 1.517  | 0.129311  | 1.208 | 0.227086  |
| rs339698   | 3 | 42732236 | 1.535  | 0.124857  | 1.266 | 0.205644  |
| rs13320571 | 3 | 43334020 | 1.403  | 0.160483  | 1.268 | 0.204689  |
| rs1008369  | 3 | 44105159 | 1.406  | 0.159637  | 1.246 | 0.212947  |
| rs33762    | 3 | 45278332 | 1.395  | 0.162917  | 1.18  | 0.23807   |
| rs9872121  | 3 | 46140002 | 1.314  | 0.188731  | 1.081 | 0.279795  |
| rs2385860  | 3 | 46910618 | 1.502  | 0.13315   | 1.21  | 0.226428  |
| rs4383546  | 3 | 47541800 | 1.506  | 0.132142  | 1.199 | 0.230406  |
| rs6792156  | 3 | 48654938 | 1.328  | 0.184052  | 1.176 | 0.239421  |
| rs72936890 | 3 | 49179225 | 1.336  | 0.181641  | 1.201 | 0.229915  |
| rs2282751  | 3 | 50291785 | 1.314  | 0.188899  | 1.243 | 0.213993  |
| rs13095652 | 3 | 51243837 | 1.307  | 0.191288  | 1.291 | 0.19672   |
| rs12639503 | 3 | 51860817 | 1.302  | 0.193082  | 1.279 | 0.200731  |
| rs2710333  | 3 | 52834753 | 1.08   | 0.279997  | 1.166 | 0.243544  |
| rs9856661  | 3 | 54077256 | 0.696  | 0.486308  | 1.003 | 0.315869  |
| rs28594819 | 3 | 54628483 | 0.35   | 0.726536  | 0.909 | 0.363319  |
| rs4955984  | 3 | 55378503 | 0.159  | 0.873912  | 1.051 | 0.293059  |
| rs978979   | 3 | 56533016 | 0.061  | 0.951667  | 1.067 | 0.285921  |
| rs9825091  | 3 | 56796026 | 0.064  | 0.949038  | 1.068 | 0.285554  |
| rs839231   | 3 | 58022761 | -0.054 | 0.957271  | 1.08  | 0.279958  |
| rs1127745  | 3 | 58512237 | -0.06  | 0.952332  | 1.083 | 0.278924  |
| rs7633596  | 3 | 59678338 | -0.105 | 0.916347  | 0.992 | 0.321367  |
| rs409484   | 3 | 60420417 | 0.311  | 0.756123  | 1.44  | 0.149852  |
| rs1037463  | 3 | 61319630 | 0.237  | 0.812701  | 1.199 | 0.230687  |
| rs833660   | 3 | 62552794 | 0.147  | 0.882826  | 1.11  | 0.267061  |
| rs9829530  | 3 | 63404743 | -0.025 | 0.980107  | 0.897 | 0.36982   |
| rs7648640  | 3 | 64332101 | -0.251 | 0.801785  | 0.589 | 0.555817  |
| rs7432993  | 3 | 65038539 | -0.245 | 0.806224  | 0.5   | 0.61693   |

|            |   |           |        |           |        |          |
|------------|---|-----------|--------|-----------|--------|----------|
| rs28638434 | 3 | 65839082  | -0.035 | 0.972336  | 0.563  | 0.573211 |
| rs3915033  | 3 | 66548271  | 0.089  | 0.929082  | 0.512  | 0.608715 |
| rs60601322 | 3 | 67298276  | 0.222  | 0.824687  | 0.394  | 0.693436 |
| rs1352855  | 3 | 68362436  | 0.172  | 0.863456  | 0.277  | 0.782109 |
| rs4422316  | 3 | 69202605  | 0.121  | 0.903313  | 0.204  | 0.8385   |
| rs35026817 | 3 | 70136592  | 0.222  | 0.824608  | 0.248  | 0.80422  |
| rs6549374  | 3 | 71088268  | 0.133  | 0.894385  | 0.027  | 0.978143 |
| rs7629597  | 3 | 72207426  | 0.244  | 0.807501  | -0.112 | 0.911078 |
| rs36061263 | 3 | 72578312  | 0.191  | 0.848688  | -0.296 | 0.767248 |
| rs615326   | 3 | 74400688  | 0.289  | 0.772776  | -0.299 | 0.764628 |
| rs6549722  | 3 | 75373177  | 0.226  | 0.821253  | -0.253 | 0.800636 |
| rs6549827  | 3 | 75980277  | 0.209  | 0.834209  | -0.203 | 0.839112 |
| rs4343667  | 3 | 77103671  | 0.034  | 0.97269   | -0.522 | 0.601581 |
| rs13434227 | 3 | 77384295  | 0.021  | 0.983423  | -0.578 | 0.563046 |
| rs9683050  | 3 | 78609414  | -0.213 | 0.831292  | -1.041 | 0.297793 |
| rs1563382  | 3 | 79236891  | -0.323 | 0.746523  | -1.239 | 0.215501 |
| rs9835625  | 3 | 80381180  | -0.431 | 0.666509  | -1.381 | 0.167172 |
| rs2639242  | 3 | 81019528  | -0.478 | 0.632701  | -1.443 | 0.148895 |
| rs13321907 | 3 | 82123002  | -0.512 | 0.608812  | -1.52  | 0.128456 |
| rs6805632  | 3 | 82803715  | -0.491 | 0.623514  | -1.502 | 0.133026 |
| rs13058957 | 3 | 83697747  | -0.457 | 0.647389  | -1.444 | 0.148734 |
| rs9810168  | 3 | 84270112  | -0.409 | 0.682289  | -1.396 | 0.162644 |
| rs6808586  | 3 | 85168434  | -0.275 | 0.78368   | -1.29  | 0.197219 |
| rs7645879  | 3 | 86630813  | -0.246 | 0.805422  | -1.287 | 0.198264 |
| rs11917983 | 3 | 87458840  | -0.467 | 0.64068   | -1.356 | 0.175051 |
| rs11925040 | 3 | 89125075  | -0.401 | 0.688322  | -1.541 | 0.123252 |
| rs1521807  | 3 | 90078623  | -0.392 | 0.694749  | -1.531 | 0.125818 |
| rs7653521  | 3 | 93784559  | -0.466 | 0.641431  | -1.545 | 0.122284 |
| rs3849447  | 3 | 94772005  | -0.475 | 0.635088  | -1.501 | 0.133391 |
| rs7624575  | 3 | 95353835  | -0.48  | 0.631387  | -1.478 | 0.139511 |
| rs937878   | 3 | 96472739  | -0.553 | 0.58033   | -1.529 | 0.126375 |
| rs9784387  | 3 | 96927763  | -0.642 | 0.521034  | -1.509 | 0.131295 |
| rs75457563 | 3 | 98169442  | -0.774 | 0.438975  | -1.318 | 0.187503 |
| rs2623382  | 3 | 99067458  | -0.86  | 0.389905  | -1.273 | 0.202995 |
| rs1661287  | 3 | 100102080 | -0.82  | 0.412037  | -1.11  | 0.267106 |
| rs1143780  | 3 | 100401139 | -0.807 | 0.419647  | -1.034 | 0.301364 |
| rs72939619 | 3 | 101565964 | -0.977 | 0.328448  | -0.985 | 0.324568 |
| rs7632645  | 3 | 101984683 | -1.074 | 0.282925  | -0.999 | 0.31766  |
| rs1982373  | 3 | 103222572 | -1.354 | 0.175815  | -1.108 | 0.268077 |
| rs2399009  | 3 | 104060810 | -1.542 | 0.123168  | -1.29  | 0.196976 |
| rs12489482 | 3 | 104579408 | -1.661 | 0.0967315 | -1.395 | 0.163087 |
| rs9882153  | 3 | 105739257 | -1.84  | 0.0657555 | -1.493 | 0.135528 |
| rs1282549  | 3 | 107175486 | -2.091 | 0.0365295 | -1.206 | 0.22775  |
| rs877859   | 3 | 107714075 | -2.138 | 0.0325525 | -1.166 | 0.243668 |
| rs73850660 | 3 | 108627580 | -2.32  | 0.0203472 | -1.151 | 0.249603 |
| rs1163447  | 3 | 109056751 | -2.257 | 0.0240046 | -1.028 | 0.304038 |
| rs11714866 | 3 | 110067902 | -2.197 | 0.0279863 | -0.924 | 0.355534 |
| rs6414248  | 3 | 110882326 | -2.165 | 0.0303778 | -0.808 | 0.419287 |
| rs62277565 | 3 | 111561221 | -2.044 | 0.0409156 | -0.638 | 0.5233   |
| rs9288952  | 3 | 112185025 | -1.799 | 0.0720562 | -0.341 | 0.732975 |
| rs34958128 | 3 | 112811861 | -1.812 | 0.0699678 | -0.295 | 0.767821 |
| rs167771   | 3 | 113876275 | -1.517 | 0.129266  | 0.11   | 0.912367 |
| rs10511338 | 3 | 114516282 | -1.419 | 0.155776  | 0.212  | 0.832413 |

|            |   |           |        |           |        |          |
|------------|---|-----------|--------|-----------|--------|----------|
| rs6806816  | 3 | 115209138 | -1.403 | 0.16071   | 0.131  | 0.895727 |
| rs12629515 | 3 | 116439783 | -1.278 | 0.201211  | 0.491  | 0.623773 |
| rs2869783  | 3 | 117084328 | -1.207 | 0.227498  | 0.699  | 0.484323 |
| rs6779441  | 3 | 118016233 | -1.308 | 0.190867  | 0.69   | 0.489945 |
| rs6762051  | 3 | 118584960 | -1.428 | 0.153266  | 0.589  | 0.556081 |
| rs2461825  | 3 | 119529605 | -1.464 | 0.143269  | 0.571  | 0.56823  |
| rs1909808  | 3 | 122325467 | -1.461 | 0.143914  | 0.849  | 0.396134 |
| rs820460   | 3 | 123355193 | -1.538 | 0.124099  | 1.167  | 0.243019 |
| rs2682243  | 3 | 123653636 | -1.689 | 0.0912865 | 1.099  | 0.271661 |
| rs7626291  | 3 | 124757777 | -1.722 | 0.0849798 | 1.027  | 0.304304 |
| rs735739   | 3 | 125993533 | -1.512 | 0.130658  | 1.048  | 0.29466  |
| rs75647890 | 3 | 127094785 | -1.247 | 0.21253   | 0.957  | 0.338721 |
| rs3828417  | 3 | 128128254 | -0.692 | 0.488811  | 1.068  | 0.285593 |
| rs2625953  | 3 | 129245828 | -0.436 | 0.663187  | 1.174  | 0.240209 |
| rs1554513  | 3 | 130504256 | -0.604 | 0.54584   | 0.836  | 0.403393 |
| rs75554452 | 3 | 131323142 | -0.699 | 0.484257  | 0.562  | 0.574034 |
| rs9818117  | 3 | 132294075 | -0.528 | 0.597239  | 0.683  | 0.494674 |
| rs6781238  | 3 | 133298120 | -0.398 | 0.690908  | 0.528  | 0.597539 |
| rs4955503  | 3 | 134536447 | -0.394 | 0.693252  | 0.444  | 0.656971 |
| rs59686685 | 3 | 134866596 | -0.403 | 0.687258  | 0.435  | 0.663575 |
| rs9845457  | 3 | 135914476 | -0.18  | 0.857254  | 0.588  | 0.556312 |
| rs6439703  | 3 | 137055121 | -0.09  | 0.928112  | 0.561  | 0.57503  |
| rs76319842 | 3 | 138039847 | -0.104 | 0.91755   | 0.529  | 0.596755 |
| rs641320   | 3 | 138347957 | -0.055 | 0.955879  | 0.554  | 0.579672 |
| rs192689   | 3 | 139290811 | 0.034  | 0.972761  | 0.662  | 0.507654 |
| rs7645419  | 3 | 139874594 | 0.2    | 0.84147   | 0.747  | 0.455045 |
| rs13080353 | 3 | 140875814 | 0.204  | 0.838397  | 0.681  | 0.49582  |
| rs12106890 | 3 | 141519874 | 0.353  | 0.724223  | 0.889  | 0.373781 |
| rs6781362  | 3 | 142653680 | 0.256  | 0.798058  | 1.004  | 0.315211 |
| rs16854503 | 3 | 143571147 | 0.265  | 0.790706  | 1.184  | 0.236529 |
| rs13061517 | 3 | 144828905 | 0.089  | 0.92909   | 1.038  | 0.299053 |
| rs5029230  | 3 | 145701129 | -0.034 | 0.973092  | 0.924  | 0.355249 |
| rs11928953 | 3 | 146634035 | -0.101 | 0.919535  | 0.862  | 0.388735 |
| rs13080231 | 3 | 147321164 | -0.111 | 0.911644  | 0.896  | 0.370447 |
| rs1492084  | 3 | 148395342 | -0.183 | 0.854787  | 1.088  | 0.276397 |
| rs34443048 | 3 | 148900209 | -0.177 | 0.859532  | 1.094  | 0.274147 |
| rs7629443  | 3 | 149925742 | -0.314 | 0.753251  | 1.098  | 0.272071 |
| rs28690162 | 3 | 150915582 | -0.583 | 0.560075  | 0.89   | 0.373437 |
| rs325798   | 3 | 151921374 | -0.798 | 0.425001  | 0.814  | 0.415723 |
| rs11921716 | 3 | 152866187 | -0.972 | 0.33121   | 0.636  | 0.524775 |
| rs4680071  | 3 | 153261174 | -1.052 | 0.292636  | 0.442  | 0.658201 |
| rs6776293  | 3 | 154405414 | -1.226 | 0.22004   | 0.222  | 0.8244   |
| rs28742885 | 3 | 155122287 | -1.323 | 0.185944  | 0.085  | 0.932552 |
| rs57357532 | 3 | 156167351 | -1.338 | 0.18105   | -0.016 | 0.987039 |
| rs9849733  | 3 | 157394261 | -1.595 | 0.110815  | -0.232 | 0.816227 |
| rs6801076  | 3 | 158163824 | -1.601 | 0.109269  | -0.283 | 0.777397 |
| rs9876980  | 3 | 160354862 | -1.616 | 0.106162  | -0.452 | 0.651405 |
| rs9831488  | 3 | 160755062 | -1.657 | 0.0974968 | -0.503 | 0.614758 |
| rs2063361  | 3 | 161865945 | -1.693 | 0.0905144 | -0.59  | 0.55547  |
| rs9283631  | 3 | 163214096 | -1.711 | 0.0871255 | -0.687 | 0.492313 |
| rs7639432  | 3 | 164427282 | -1.788 | 0.0738459 | -0.785 | 0.432687 |
| rs1355535  | 3 | 165505759 | -1.961 | 0.0498402 | -1.029 | 0.303703 |
| rs79143242 | 3 | 165925749 | -2.053 | 0.0401136 | -1.109 | 0.267567 |

|            |   |           |        |             |        |            |
|------------|---|-----------|--------|-------------|--------|------------|
| rs9811119  | 3 | 167160385 | -2.205 | 0.0274764   | -1.262 | 0.206799   |
| rs6803163  | 3 | 167928256 | -2.436 | 0.0148526   | -1.572 | 0.116064   |
| rs9290364  | 3 | 168995182 | -2.642 | 0.00823951  | -1.699 | 0.0892954  |
| rs9816125  | 3 | 170222679 | -2.615 | 0.00892884  | -1.718 | 0.0857886  |
| rs13084948 | 3 | 171077831 | -2.416 | 0.0156938   | -1.53  | 0.125946   |
| rs60060598 | 3 | 171687333 | -2.596 | 0.00942843  | -1.657 | 0.0975253  |
| rs13060413 | 3 | 172505963 | -2.79  | 0.00527421  | -1.857 | 0.063281   |
| rs11705889 | 3 | 173159587 | -2.876 | 0.00402659  | -1.896 | 0.0580057  |
| rs9290494  | 3 | 173859622 | -2.961 | 0.00306975  | -1.701 | 0.088935   |
| rs9865132  | 3 | 174732812 | -2.983 | 0.00285512  | -1.534 | 0.124954   |
| rs9833254  | 3 | 175403905 | -3.087 | 0.0020191   | -1.568 | 0.116928   |
| rs1601949  | 3 | 176592050 | -3.404 | 0.000663297 | -1.992 | 0.046425   |
| rs1978396  | 3 | 177603160 | -3.676 | 0.000237224 | -2.352 | 0.0186737  |
| rs9813809  | 3 | 178531971 | -3.737 | 0.000185989 | -2.428 | 0.0151722  |
| rs7355960  | 3 | 179084046 | -3.8   | 0.000144954 | -2.452 | 0.0141925  |
| rs6786246  | 3 | 180103508 | -3.951 | 7.78064E-05 | -2.616 | 0.00890523 |
| rs2718780  | 3 | 180906054 | -4.013 | 5.99271E-05 | -2.789 | 0.00528024 |
| rs1561072  | 3 | 181752619 | -3.974 | 7.05337E-05 | -2.827 | 0.00469134 |
| rs4859259  | 3 | 182664547 | -3.897 | 9.74465E-05 | -2.837 | 0.00455338 |
| rs9827156  | 3 | 183380900 | -3.925 | 8.68804E-05 | -3.011 | 0.00260561 |
| rs7614232  | 3 | 184452676 | -3.952 | 7.75173E-05 | -2.797 | 0.0051578  |
| rs9841201  | 3 | 185505984 | -3.912 | 9.15614E-05 | -2.68  | 0.00735513 |
| rs9871546  | 3 | 186304218 | -3.327 | 0.000877782 | -2.001 | 0.0454301  |
| rs12494215 | 3 | 186837198 | -2.918 | 0.00352798  | -1.522 | 0.128032   |
| rs471768   | 3 | 187619782 | -2.924 | 0.00345632  | -1.368 | 0.171462   |
| rs710493   | 3 | 188694749 | -3.009 | 0.00262317  | -1.571 | 0.116282   |
| rs13316596 | 3 | 190220784 | -2.846 | 0.00442738  | -1.448 | 0.147643   |
| rs9877210  | 3 | 192019370 | -2.559 | 0.010487    | -1.13  | 0.258551   |
| rs1505439  | 3 | 192497035 | -2.516 | 0.0118677   | -1.244 | 0.21352    |
| rs6777021  | 3 | 193711182 | -2.09  | 0.0365809   | -1.215 | 0.224554   |
| rs10933728 | 3 | 194027568 | -1.468 | 0.142164    | -1.062 | 0.288118   |
| rs6437466  | 3 | 194977845 | -1.13  | 0.25866     | -0.799 | 0.424568   |
| rs7659     | 3 | 195295661 | -1.082 | 0.279426    | -0.819 | 0.412577   |
| rs11715619 | 3 | 196334416 | -1.003 | 0.315784    | -0.85  | 0.395339   |
| rs2567346  | 3 | 197195013 | -0.999 | 0.317578    | -0.842 | 0.399795   |
| rs60149583 | 3 | 197624444 | -0.997 | 0.31864     | -0.838 | 0.402028   |
| rs4974629  | 4 | 1135350   | -3.915 | 9.04132E-05 | -1.783 | 0.0746562  |
| rs57114230 | 4 | 2401162   | -4.012 | 6.01297E-05 | -1.786 | 0.074027   |
| rs28681351 | 4 | 3879527   | -3.979 | 0.000069097 | -1.65  | 0.0990149  |
| rs10937615 | 4 | 5023112   | -3.935 | 8.33688E-05 | -1.543 | 0.122757   |
| rs4353849  | 4 | 5638652   | -3.956 | 7.61592E-05 | -1.486 | 0.137201   |
| rs4689425  | 4 | 6378053   | -3.866 | 0.000110835 | -1.142 | 0.253296   |
| rs28572756 | 4 | 7262933   | -4.121 | 3.77566E-05 | -1.093 | 0.274552   |
| rs10015734 | 4 | 7651008   | -4.059 | 0.000049219 | -0.868 | 0.38526    |
| rs9715724  | 4 | 8641696   | -4.097 | 4.18697E-05 | -0.689 | 0.490678   |
| rs2280333  | 4 | 9811133   | -3.896 | 0.000097764 | -0.589 | 0.555826   |
| rs57755073 | 4 | 10482748  | -3.817 | 0.000135355 | -0.643 | 0.520162   |
| rs10009253 | 4 | 11216238  | -3.698 | 0.000217643 | -0.561 | 0.574708   |
| rs6825164  | 4 | 12441831  | -3.63  | 0.000282999 | -0.652 | 0.514244   |
| rs758974   | 4 | 13539370  | -3.665 | 0.000247659 | -0.665 | 0.505877   |
| rs11733057 | 4 | 14643667  | -3.948 | 7.87367E-05 | -0.83  | 0.406732   |
| rs2430319  | 4 | 15394317  | -4.231 | 2.32913E-05 | -0.865 | 0.387269   |
| rs17478336 | 4 | 16025837  | -4.257 | 2.07101E-05 | -0.712 | 0.476158   |

|            |   |          |        |             |        |           |
|------------|---|----------|--------|-------------|--------|-----------|
| rs169606   | 4 | 16784688 | -4.209 | 2.56908E-05 | -0.554 | 0.579378  |
| rs34777344 | 4 | 17304849 | -4.082 | 4.46523E-05 | -0.386 | 0.699573  |
| rs10016578 | 4 | 18066346 | -3.837 | 0.000124524 | -0.225 | 0.821597  |
| rs7656712  | 4 | 18709859 | -3.819 | 0.000133761 | -0.21  | 0.83381   |
| rs73109405 | 4 | 21192476 | -4.08  | 4.51251E-05 | -0.506 | 0.613141  |
| rs9291432  | 4 | 21980503 | -4.196 | 2.71934E-05 | -0.61  | 0.542145  |
| rs885395   | 4 | 23770218 | -3.913 | 9.10538E-05 | -0.504 | 0.614182  |
| rs10000609 | 4 | 25816048 | -3.333 | 0.000860559 | -0.275 | 0.783698  |
| rs10805265 | 4 | 26585311 | -2.525 | 0.0115722   | 0.257  | 0.796856  |
| rs11724540 | 4 | 27151640 | -2.369 | 0.0178424   | 0.583  | 0.560098  |
| rs4234993  | 4 | 28202490 | -2.066 | 0.038867    | 1.114  | 0.265098  |
| rs7694141  | 4 | 29172030 | -1.937 | 0.0528049   | 1.505  | 0.132387  |
| rs11946295 | 4 | 29894959 | -1.776 | 0.0757644   | 1.775  | 0.0758544 |
| rs6832276  | 4 | 31017465 | -1.716 | 0.0862327   | 1.853  | 0.0639538 |
| rs404532   | 4 | 31461728 | -1.738 | 0.0822703   | 1.887  | 0.0592135 |
| rs1388282  | 4 | 32311931 | -1.615 | 0.106308    | 1.864  | 0.0623112 |
| rs1448275  | 4 | 33049687 | -1.188 | 0.234704    | 1.873  | 0.0610608 |
| rs11941822 | 4 | 34127755 | -1.012 | 0.311579    | 1.926  | 0.0541411 |
| rs11936559 | 4 | 34452360 | -1.035 | 0.30086     | 1.901  | 0.0572739 |
| rs10049867 | 4 | 36267669 | -1.19  | 0.234214    | 1.833  | 0.0668555 |
| rs882161   | 4 | 36823862 | -1.281 | 0.200282    | 1.692  | 0.0907309 |
| rs4832930  | 4 | 37673626 | -1.296 | 0.195095    | 1.611  | 0.107099  |
| rs11096993 | 4 | 39340664 | -0.926 | 0.354571    | 1.644  | 0.100185  |
| rs1688939  | 4 | 40549098 | -0.671 | 0.502504    | 1.258  | 0.20853   |
| rs4368643  | 4 | 41547137 | 0.135  | 0.892218    | 1.091  | 0.275439  |
| rs4421020  | 4 | 42058286 | 0.141  | 0.887571    | 1.091  | 0.275328  |
| rs4861259  | 4 | 43236456 | -0.254 | 0.799482    | 0.477  | 0.633624  |
| rs12641223 | 4 | 43571643 | -0.318 | 0.750503    | 0.353  | 0.723972  |
| rs6815111  | 4 | 44531148 | -0.303 | 0.762203    | 0.208  | 0.835319  |
| rs73129367 | 4 | 46209120 | -0.124 | 0.901396    | 0.134  | 0.89351   |
| rs28457819 | 4 | 47418991 | 0.084  | 0.932797    | 0.141  | 0.888026  |
| rs10938531 | 4 | 48453226 | 0.303  | 0.762124    | 0.185  | 0.852945  |
| rs4695416  | 4 | 48995616 | 0.31   | 0.75692     | 0.162  | 0.871234  |
| rs11133358 | 4 | 52983401 | 0.304  | 0.761185    | 0.173  | 0.862641  |
| rs59038013 | 4 | 54682583 | -0.004 | 0.99687     | 0.097  | 0.922632  |
| rs1156180  | 4 | 55259169 | -0.397 | 0.69117     | -0.18  | 0.85691   |
| rs17081857 | 4 | 56043330 | -0.682 | 0.49511     | -0.36  | 0.718747  |
| rs2611818  | 4 | 56910860 | -0.739 | 0.4599      | -0.431 | 0.666654  |
| rs61389544 | 4 | 57630315 | -0.76  | 0.447442    | -0.329 | 0.74251   |
| rs2048268  | 4 | 58603583 | -0.812 | 0.416859    | -0.38  | 0.7036    |
| rs6833940  | 4 | 59156875 | -0.774 | 0.438761    | -0.328 | 0.74312   |
| rs1106995  | 4 | 60208272 | -0.582 | 0.560733    | -0.114 | 0.909288  |
| rs12504530 | 4 | 60959404 | -0.591 | 0.554472    | -0.053 | 0.957768  |
| rs6840809  | 4 | 61894902 | -0.482 | 0.629888    | -0.037 | 0.970619  |
| rs12640613 | 4 | 62256581 | -0.527 | 0.597965    | -0.09  | 0.928488  |
| rs6823706  | 4 | 63448482 | -0.46  | 0.645352    | -0.012 | 0.99003   |
| rs73224221 | 4 | 64961101 | -0.308 | 0.758255    | 0.159  | 0.874009  |
| rs9998833  | 4 | 66500776 | -0.23  | 0.818411    | 0.258  | 0.796534  |
| rs11942370 | 4 | 67236293 | -0.208 | 0.835189    | 0.373  | 0.708901  |
| rs1390066  | 4 | 67809075 | -0.19  | 0.849692    | 0.389  | 0.69735   |
| rs10032416 | 4 | 68704829 | -0.185 | 0.853161    | 0.415  | 0.678323  |
| rs7679122  | 4 | 69820283 | 0.024  | 0.98121     | 0.73   | 0.465561  |
| rs7689609  | 4 | 72083374 | 0.03   | 0.975861    | 1.047  | 0.295148  |

|            |   |           |        |           |        |          |
|------------|---|-----------|--------|-----------|--------|----------|
| rs7660290  | 4 | 73255740  | 0.253  | 0.799976  | 1.018  | 0.308826 |
| rs55734204 | 4 | 73593914  | 0.27   | 0.787469  | 0.98   | 0.326968 |
| rs1435521  | 4 | 74807928  | 0.61   | 0.542002  | 0.987  | 0.323606 |
| rs4694666  | 4 | 75067842  | 0.602  | 0.547205  | 0.896  | 0.370155 |
| rs7658297  | 4 | 76232211  | 0.697  | 0.485497  | 0.913  | 0.361068 |
| rs7664889  | 4 | 77087704  | 0.53   | 0.596312  | 0.806  | 0.420353 |
| rs28407747 | 4 | 77992344  | -0.236 | 0.813355  | 0.425  | 0.670904 |
| rs7669299  | 4 | 78447144  | -0.576 | 0.564282  | 0.253  | 0.800421 |
| rs1390738  | 4 | 79481578  | -0.798 | 0.42475   | 0.199  | 0.842397 |
| rs3822106  | 4 | 79784527  | -0.79  | 0.429608  | 0.211  | 0.833092 |
| rs2867697  | 4 | 81002230  | -0.8   | 0.423809  | 0.235  | 0.8145   |
| rs1517552  | 4 | 82046984  | -1.031 | 0.302696  | 0.036  | 0.971539 |
| rs10488928 | 4 | 82332999  | -1.074 | 0.282615  | 0.036  | 0.97131  |
| rs9968403  | 4 | 83447941  | -1.281 | 0.200287  | -0.158 | 0.874771 |
| rs13129469 | 4 | 83991529  | -1.508 | 0.131585  | -0.531 | 0.595762 |
| rs2178603  | 4 | 85090749  | -1.444 | 0.148618  | -0.495 | 0.620746 |
| rs4314278  | 4 | 86027367  | -1.596 | 0.110447  | -0.548 | 0.583892 |
| rs6531908  | 4 | 87176315  | -1.774 | 0.0760029 | -0.654 | 0.513068 |
| rs2705622  | 4 | 87827545  | -1.858 | 0.0631627 | -0.776 | 0.437915 |
| rs2725264  | 4 | 89026109  | -2.045 | 0.0408599 | -0.788 | 0.430435 |
| rs1560489  | 4 | 90198463  | -1.858 | 0.0631108 | -0.447 | 0.654678 |
| rs6814827  | 4 | 91340668  | -1.749 | 0.0803594 | -0.237 | 0.812989 |
| rs13121513 | 4 | 92063883  | -1.718 | 0.0858565 | -0.109 | 0.913026 |
| rs60792483 | 4 | 92723843  | -1.743 | 0.0813523 | -0.097 | 0.922686 |
| rs12640873 | 4 | 93743330  | -1.728 | 0.0840591 | -0.083 | 0.933599 |
| rs4558831  | 4 | 94761551  | -1.488 | 0.136836  | 0.157  | 0.875538 |
| rs3805300  | 4 | 95424208  | -1.343 | 0.179412  | 0.203  | 0.839499 |
| rs2865704  | 4 | 96641797  | -1.245 | 0.213289  | 0.275  | 0.783219 |
| rs1922856  | 4 | 97651593  | -1.119 | 0.263174  | 0.266  | 0.790486 |
| rs10470892 | 4 | 98330219  | -1.029 | 0.303291  | 0.294  | 0.768725 |
| rs4414961  | 4 | 99403784  | -1.036 | 0.300309  | 0.318  | 0.750538 |
| rs10021082 | 4 | 100444178 | -1.007 | 0.313831  | 0.331  | 0.740382 |
| rs61661059 | 4 | 100696088 | -0.843 | 0.399057  | 0.436  | 0.662703 |
| rs1567283  | 4 | 101724663 | -0.597 | 0.550391  | 0.605  | 0.545046 |
| rs755961   | 4 | 102199866 | -0.606 | 0.544695  | 0.53   | 0.596275 |
| rs7662047  | 4 | 103091730 | -0.453 | 0.650894  | 0.625  | 0.53189  |
| rs28544093 | 4 | 104182954 | -0.269 | 0.787831  | 0.785  | 0.43252  |
| rs7657799  | 4 | 105375423 | 0.077  | 0.938945  | 1.048  | 0.294535 |
| rs11941690 | 4 | 106611260 | 0.282  | 0.777967  | 1.156  | 0.247667 |
| rs72889059 | 4 | 107408978 | 0.425  | 0.670851  | 1.141  | 0.253735 |
| rs1388847  | 4 | 108119290 | 0.433  | 0.664722  | 1.134  | 0.256902 |
| rs4956153  | 4 | 108987870 | 0.263  | 0.792208  | 0.991  | 0.32184  |
| rs28878884 | 4 | 110233425 | 0.041  | 0.967158  | 0.788  | 0.430577 |
| rs4698804  | 4 | 110940045 | -0.119 | 0.905062  | 0.674  | 0.500406 |
| rs1448801  | 4 | 111519203 | -0.219 | 0.826479  | 0.512  | 0.608766 |
| rs7655012  | 4 | 112658896 | -0.316 | 0.751629  | 0.347  | 0.728875 |
| rs7689257  | 4 | 113861627 | -0.412 | 0.68044   | 0.235  | 0.814122 |
| rs7660775  | 4 | 114611948 | -0.338 | 0.73535   | 0.313  | 0.754026 |
| rs4146409  | 4 | 116547100 | -0.138 | 0.890585  | 0.617  | 0.536958 |
| rs1827950  | 4 | 117098482 | -0.13  | 0.896797  | 0.606  | 0.54429  |
| rs7681687  | 4 | 118204404 | -0.066 | 0.947533  | 0.687  | 0.492147 |
| rs2389504  | 4 | 118981759 | -0.106 | 0.915373  | 0.71   | 0.47756  |
| rs6823633  | 4 | 120566390 | -0.069 | 0.94477   | 0.829  | 0.407333 |



|            |   |           |        |           |        |          |
|------------|---|-----------|--------|-----------|--------|----------|
| rs17051152 | 4 | 121553198 | -0.052 | 0.95883   | 0.867  | 0.38581  |
| rs4406041  | 4 | 121949190 | -0.051 | 0.959613  | 0.888  | 0.374637 |
| rs7662117  | 4 | 122866432 | -0.372 | 0.709934  | 0.702  | 0.482444 |
| rs304643   | 4 | 124090249 | -0.64  | 0.522091  | 0.509  | 0.610772 |
| rs1806534  | 4 | 124509750 | -0.686 | 0.492419  | 0.595  | 0.551571 |
| rs10016824 | 4 | 125728821 | -0.863 | 0.387938  | 0.559  | 0.575844 |
| rs11098878 | 4 | 127414252 | -0.996 | 0.319083  | 0.529  | 0.596917 |
| rs12507548 | 4 | 127871615 | -0.977 | 0.3288    | 0.567  | 0.570971 |
| rs10025241 | 4 | 129037362 | -1.038 | 0.299402  | 0.532  | 0.594631 |
| rs1216400  | 4 | 129512318 | -1.051 | 0.29334   | 0.531  | 0.595605 |
| rs6836368  | 4 | 130751286 | -1.185 | 0.236033  | 0.494  | 0.621382 |
| rs1355185  | 4 | 131220233 | -1.176 | 0.239528  | 0.528  | 0.597381 |
| rs13145850 | 4 | 132956813 | -1.27  | 0.204112  | 0.201  | 0.84096  |
| rs9307691  | 4 | 134169038 | -1.341 | 0.179875  | -0.073 | 0.942064 |
| rs2174784  | 4 | 134613019 | -1.347 | 0.177911  | -0.163 | 0.870287 |
| rs11099300 | 4 | 135860262 | -1.427 | 0.153652  | -0.275 | 0.783427 |
| rs2122703  | 4 | 137186742 | -1.696 | 0.0898913 | -0.547 | 0.584349 |
| rs9683944  | 4 | 138433162 | -1.985 | 0.0471899 | -0.668 | 0.50429  |
| rs1450458  | 4 | 139448580 | -2.14  | 0.0323293 | -0.611 | 0.541494 |
| rs2646074  | 4 | 140617080 | -2.041 | 0.0412589 | -0.463 | 0.643722 |
| rs1872861  | 4 | 141755890 | -1.932 | 0.0533221 | -0.282 | 0.77779  |
| rs3775605  | 4 | 142968081 | -1.517 | 0.129327  | 0.28   | 0.779737 |
| rs2636675  | 4 | 143224472 | -1.476 | 0.139833  | 0.323  | 0.746852 |
| rs1397529  | 4 | 144392162 | -1.293 | 0.195919  | 0.432  | 0.665434 |
| rs1849129  | 4 | 144965840 | -1.242 | 0.214209  | 0.428  | 0.668713 |
| rs4624674  | 4 | 145776454 | -1.156 | 0.247549  | 0.44   | 0.659614 |
| rs6848098  | 4 | 146447193 | -1.146 | 0.251756  | 0.348  | 0.72819  |
| rs56399143 | 4 | 147630649 | -1.265 | 0.205867  | 0.085  | 0.932208 |
| rs17614025 | 4 | 148810260 | -0.963 | 0.33576   | 0.042  | 0.966487 |
| rs10016143 | 4 | 149615561 | -0.901 | 0.367335  | 0.072  | 0.942589 |
| rs17026528 | 4 | 150831128 | -0.946 | 0.343994  | -0.057 | 0.954733 |
| rs6835367  | 4 | 151509839 | -0.877 | 0.380661  | -0.027 | 0.97863  |
| rs4696239  | 4 | 152159540 | -0.862 | 0.388762  | -0.016 | 0.986874 |
| rs2676329  | 4 | 153275395 | -0.532 | 0.594616  | 0.472  | 0.63703  |
| rs28754692 | 4 | 154125435 | -0.46  | 0.645374  | 0.66   | 0.509483 |
| rs7692206  | 4 | 155106693 | -0.273 | 0.784967  | 1.195  | 0.232188 |
| rs2011741  | 4 | 156299620 | -0.132 | 0.895111  | 1.18   | 0.2381   |
| rs4259017  | 4 | 157050382 | 0.121  | 0.903338  | 1.288  | 0.197887 |
| rs6816767  | 4 | 157703932 | 0.335  | 0.737668  | 1.399  | 0.161951 |
| rs4691430  | 4 | 158610621 | 0.464  | 0.642854  | 1.501  | 0.133366 |
| rs12505765 | 4 | 159544076 | 0.39   | 0.696824  | 1.391  | 0.164199 |
| rs2348164  | 4 | 160341351 | 0.451  | 0.65217   | 1.442  | 0.149417 |
| rs11725207 | 4 | 161064449 | 0.488  | 0.625619  | 1.502  | 0.132993 |
| rs6536541  | 4 | 161767814 | 0.385  | 0.700274  | 1.431  | 0.152298 |
| rs6853066  | 4 | 162666280 | 0.166  | 0.868349  | 1.208  | 0.226925 |
| rs28750093 | 4 | 163182059 | 0.104  | 0.916881  | 1.137  | 0.255628 |
| rs13106852 | 4 | 163948955 | -0.191 | 0.848444  | 0.988  | 0.323253 |
| rs72991534 | 4 | 164539505 | -0.631 | 0.528173  | 0.715  | 0.474524 |
| rs6842082  | 4 | 165701031 | -1.245 | 0.21328   | 0.519  | 0.603509 |
| rs7667026  | 4 | 166449915 | -1.648 | 0.0993845 | -0.022 | 0.98227  |
| rs7674577  | 4 | 167625748 | -1.857 | 0.0633351 | -0.243 | 0.808207 |
| rs730741   | 4 | 168610140 | -2.051 | 0.0402741 | -0.431 | 0.66629  |
| rs28679640 | 4 | 169772041 | -2.135 | 0.0327848 | -0.505 | 0.613372 |

|            |   |           |        |            |        |           |
|------------|---|-----------|--------|------------|--------|-----------|
| rs13122912 | 4 | 170676328 | -2.09  | 0.0366423  | -0.117 | 0.90656   |
| rs2332031  | 4 | 171742958 | -2.017 | 0.0436945  | 0.132  | 0.894789  |
| rs6855599  | 4 | 172393958 | -2.022 | 0.0431684  | 0.249  | 0.803305  |
| rs1459157  | 4 | 173739244 | -2.396 | 0.0165761  | -0.189 | 0.850475  |
| rs3889926  | 4 | 174859997 | -2.391 | 0.0167798  | -0.226 | 0.821144  |
| rs2612657  | 4 | 175428308 | -2.27  | 0.023225   | -0.29  | 0.771717  |
| rs10461336 | 4 | 176391372 | -2.229 | 0.0257953  | -0.356 | 0.722017  |
| rs13144028 | 4 | 176832164 | -2.245 | 0.0247852  | -0.448 | 0.654027  |
| rs2574920  | 4 | 177867289 | -2.408 | 0.016056   | -0.373 | 0.709106  |
| rs17064420 | 4 | 178128842 | -2.43  | 0.0150804  | -0.368 | 0.712917  |
| rs6813007  | 4 | 179987927 | -3.022 | 0.00250824 | -1.312 | 0.189454  |
| rs17068098 | 4 | 180672019 | -2.919 | 0.00351333 | -1.394 | 0.163217  |
| rs10025005 | 4 | 181288587 | -2.832 | 0.00462912 | -1.389 | 0.164682  |
| rs12645288 | 4 | 182975074 | -2.572 | 0.010117   | -1.233 | 0.217591  |
| rs1877288  | 4 | 184189457 | -2.444 | 0.0145255  | -0.976 | 0.329032  |
| rs6834333  | 4 | 184852809 | -2.204 | 0.027552   | -0.732 | 0.464195  |
| rs6829140  | 4 | 185782086 | -1.694 | 0.090261   | -0.383 | 0.702002  |
| rs7691485  | 4 | 186448476 | -1.211 | 0.225914   | -0.292 | 0.770495  |
| rs9312345  | 4 | 187091644 | -0.867 | 0.386014   | -0.304 | 0.760908  |
| rs11736748 | 4 | 188042174 | -0.879 | 0.379671   | -0.305 | 0.760486  |
| rs7677969  | 4 | 188456382 | -0.69  | 0.489926   | -0.045 | 0.963847  |
| rs2010907  | 4 | 189540683 | -0.736 | 0.461688   | -0.077 | 0.938379  |
| rs2685820  | 4 | 190758884 | -0.736 | 0.461757   | -0.012 | 0.990652  |
| rs10071261 | 5 | 1013694   | 2.047  | 0.0406603  | 1.737  | 0.082447  |
| rs73033830 | 5 | 1514830   | 2.236  | 0.0253289  | 1.889  | 0.058866  |
| rs4429860  | 5 | 2361360   | 2.559  | 0.0105063  | 2.138  | 0.0325569 |
| rs6555170  | 5 | 3058229   | 2.671  | 0.00756644 | 2.154  | 0.0312057 |
| rs2047073  | 5 | 4112793   | 2.422  | 0.0154537  | 1.456  | 0.145336  |
| rs11747238 | 5 | 4778369   | 2.366  | 0.017994   | 1.303  | 0.192474  |
| rs4143541  | 5 | 5725162   | 2.096  | 0.0360959  | 1.24   | 0.215047  |
| rs7712952  | 5 | 6483942   | 1.978  | 0.0479566  | 1.041  | 0.298003  |
| rs2055388  | 5 | 7527521   | 1.781  | 0.0749083  | 1.046  | 0.295406  |
| rs326136   | 5 | 7797766   | 1.765  | 0.0775769  | 1.079  | 0.280602  |
| rs4702592  | 5 | 8842673   | 1.714  | 0.0864625  | 1.115  | 0.264852  |
| rs1805972  | 5 | 9203914   | 1.797  | 0.0723034  | 1.367  | 0.171471  |
| rs2012362  | 5 | 10450427  | 1.812  | 0.0700526  | 0.851  | 0.394853  |
| rs31899    | 5 | 11429782  | 2.135  | 0.0327701  | 0.755  | 0.450496  |
| rs6893303  | 5 | 12589944  | 2.272  | 0.0230812  | 0.841  | 0.400334  |
| rs230066   | 5 | 13523834  | 2.466  | 0.013658   | 0.976  | 0.328996  |
| rs32447    | 5 | 15117438  | 2.55   | 0.0107702  | 0.918  | 0.358671  |
| rs1871171  | 5 | 16285704  | 2.311  | 0.0208332  | 0.67   | 0.502776  |
| rs871722   | 5 | 17437494  | 1.617  | 0.105936   | 0.194  | 0.846179  |
| rs10454841 | 5 | 18389151  | 1.492  | 0.135626   | 0.083  | 0.933913  |
| rs56043426 | 5 | 19060022  | 1.81   | 0.0703348  | 0.28   | 0.779546  |
| rs6451429  | 5 | 19771834  | 1.797  | 0.0723078  | 0.307  | 0.758512  |
| rs6452014  | 5 | 21868425  | 1.833  | 0.0667432  | 0.241  | 0.809542  |
| rs399805   | 5 | 22578431  | 1.76   | 0.078425   | 0.148  | 0.882181  |
| rs955300   | 5 | 23501271  | 1.524  | 0.127414   | -0.07  | 0.944381  |
| rs7380367  | 5 | 24626598  | 1.331  | 0.183269   | -0.315 | 0.752641  |
| rs13171590 | 5 | 26941841  | 1.253  | 0.210277   | -0.456 | 0.648601  |
| rs4607323  | 5 | 27432346  | 1.229  | 0.219155   | -0.492 | 0.622919  |
| rs7727623  | 5 | 28212723  | 1.1    | 0.271314   | -0.504 | 0.614486  |
| rs12516019 | 5 | 28796865  | 1.076  | 0.281811   | -0.508 | 0.611522  |

|            |   |          |        |           |        |          |
|------------|---|----------|--------|-----------|--------|----------|
| rs1276177  | 5 | 30946644 | 0.956  | 0.339263  | -0.61  | 0.541641 |
| rs4867100  | 5 | 32007713 | 0.682  | 0.49515   | -0.594 | 0.552656 |
| rs2331072  | 5 | 32658526 | 0.574  | 0.56623   | -0.516 | 0.605786 |
| rs29968    | 5 | 33547787 | 0.557  | 0.577622  | -0.366 | 0.71465  |
| rs35397    | 5 | 33951116 | 0.118  | 0.90593   | -0.434 | 0.664649 |
| rs59336322 | 5 | 35117368 | 0.373  | 0.709132  | -0.448 | 0.653913 |
| rs6884019  | 5 | 36252794 | 0.476  | 0.634291  | -0.441 | 0.659129 |
| rs930072   | 5 | 36666071 | 0.805  | 0.420543  | -0.428 | 0.668614 |
| rs2910798  | 5 | 37735849 | 0.914  | 0.360614  | -0.546 | 0.584763 |
| rs10941388 | 5 | 38241901 | 1.4    | 0.16163   | -0.326 | 0.744514 |
| rs13188259 | 5 | 39220055 | 1.634  | 0.102307  | -0.408 | 0.68316  |
| rs12659964 | 5 | 39671325 | 1.713  | 0.0866358 | -0.382 | 0.702486 |
| rs11744700 | 5 | 40630944 | 1.762  | 0.0781113 | -0.352 | 0.724697 |
| rs3901878  | 5 | 41625968 | 1.739  | 0.0821042 | -0.258 | 0.796706 |
| rs10941560 | 5 | 42009695 | 1.748  | 0.0805056 | -0.25  | 0.802467 |
| rs11746790 | 5 | 42886820 | 2.14   | 0.0323473 | -0.114 | 0.909392 |
| rs6451722  | 5 | 43711378 | 2.242  | 0.0249477 | -0.111 | 0.911311 |
| rs10058484 | 5 | 44278612 | 2.323  | 0.0201533 | -0.074 | 0.940911 |
| rs75651719 | 5 | 45009500 | 2.336  | 0.0194747 | -0.07  | 0.944426 |
| rs7705330  | 5 | 45893925 | 2.288  | 0.0221144 | -0.097 | 0.922993 |
| rs73111726 | 5 | 46299763 | 2.286  | 0.0222419 | -0.098 | 0.921975 |
| rs10940135 | 5 | 51203737 | 2.252  | 0.0243112 | -0.105 | 0.916536 |
| rs35755888 | 5 | 52013727 | 2.041  | 0.0412284 | -0.291 | 0.771194 |
| rs2650682  | 5 | 52466551 | 1.835  | 0.066517  | -0.519 | 0.603478 |
| rs3111652  | 5 | 53690669 | 1.639  | 0.101159  | -0.53  | 0.596092 |
| rs4074332  | 5 | 54141187 | 1.503  | 0.132735  | -0.569 | 0.569485 |
| rs6450366  | 5 | 55372308 | 1.278  | 0.201078  | -0.661 | 0.508928 |
| rs158493   | 5 | 55646889 | 1.192  | 0.233313  | -0.643 | 0.520141 |
| rs10070094 | 5 | 56698242 | 0.89   | 0.373587  | -0.612 | 0.540751 |
| rs58245968 | 5 | 56974669 | 0.915  | 0.360364  | -0.55  | 0.582643 |
| rs2675379  | 5 | 58093446 | 1.17   | 0.241811  | -0.36  | 0.71883  |
| rs10059859 | 5 | 59231307 | 1.28   | 0.20054   | -0.245 | 0.806525 |
| rs7712091  | 5 | 59823791 | 1.275  | 0.202472  | -0.275 | 0.783644 |
| rs4129437  | 5 | 60581371 | 1.266  | 0.205559  | -0.293 | 0.769501 |
| rs7728654  | 5 | 61396470 | 0.963  | 0.335704  | -0.454 | 0.650156 |
| rs56674737 | 5 | 62417204 | 0.981  | 0.326621  | -0.331 | 0.740375 |
| rs10040843 | 5 | 63420131 | 0.981  | 0.326543  | -0.258 | 0.796157 |
| rs6879867  | 5 | 64447660 | 1.089  | 0.276276  | -0.148 | 0.882711 |
| rs7709111  | 5 | 64774896 | 1.024  | 0.305815  | -0.17  | 0.865044 |
| rs7727613  | 5 | 65759249 | 0.822  | 0.411275  | -0.131 | 0.895999 |
| rs7711013  | 5 | 66588413 | 0.558  | 0.576816  | -0.157 | 0.874864 |
| rs55990808 | 5 | 67084776 | 0.43   | 0.666936  | -0.161 | 0.87197  |
| rs1627886  | 5 | 68002804 | 0.581  | 0.560985  | 0.003  | 0.997569 |
| rs73116811 | 5 | 68757110 | 0.623  | 0.533031  | 0.019  | 0.985009 |
| rs4976210  | 5 | 70307464 | 0.644  | 0.519366  | -0.003 | 0.997585 |
| rs7710169  | 5 | 71549048 | 0.825  | 0.409396  | 0.106  | 0.915369 |
| rs6894171  | 5 | 72762725 | 0.938  | 0.348436  | 0.19   | 0.849101 |
| rs13357495 | 5 | 73085666 | 0.883  | 0.377277  | 0.215  | 0.829883 |
| rs9686818  | 5 | 74193859 | 0.343  | 0.731455  | 0.038  | 0.96949  |
| rs1525763  | 5 | 75200884 | -0.06  | 0.952192  | -0.102 | 0.918966 |
| rs1320021  | 5 | 76219181 | -0.58  | 0.561664  | -0.339 | 0.734276 |
| rs34915710 | 5 | 77125991 | -0.826 | 0.408723  | -0.687 | 0.492054 |
| rs16876062 | 5 | 78190471 | -0.717 | 0.473574  | -0.76  | 0.44747  |

|            |   |           |        |          |        |          |
|------------|---|-----------|--------|----------|--------|----------|
| rs171821   | 5 | 79697210  | -0.377 | 0.706046 | -0.925 | 0.355035 |
| rs10075648 | 5 | 80755211  | 0.196  | 0.844715 | -0.701 | 0.483031 |
| rs6452430  | 5 | 81123574  | 0.223  | 0.82374  | -0.779 | 0.435948 |
| rs6452488  | 5 | 82085018  | 0.316  | 0.752045 | -0.902 | 0.366822 |
| rs4590163  | 5 | 83368290  | 0.312  | 0.754838 | -0.843 | 0.399059 |
| rs73772809 | 5 | 85359196  | 0.563  | 0.573743 | -0.709 | 0.478512 |
| rs2929617  | 5 | 86331061  | 0.594  | 0.552338 | -0.752 | 0.451783 |
| rs1551604  | 5 | 87070858  | 0.634  | 0.525842 | -0.732 | 0.464263 |
| rs301720   | 5 | 88233654  | 0.759  | 0.447996 | -0.571 | 0.567968 |
| rs2950049  | 5 | 89480000  | 0.805  | 0.420916 | -0.523 | 0.601145 |
| rs4916855  | 5 | 90596345  | 1.025  | 0.305468 | -0.311 | 0.756045 |
| rs35146088 | 5 | 91116709  | 1.035  | 0.300565 | -0.311 | 0.755566 |
| rs39597    | 5 | 96484131  | 1.449  | 0.147265 | -0.292 | 0.770418 |
| rs6556993  | 5 | 96946900  | 1.487  | 0.136904 | -0.263 | 0.792304 |
| rs1818348  | 5 | 98108135  | 1.527  | 0.126705 | -0.227 | 0.82057  |
| rs9326771  | 5 | 98701755  | 1.626  | 0.10386  | -0.215 | 0.829718 |
| rs60812104 | 5 | 99507495  | 1.602  | 0.109174 | -0.36  | 0.718776 |
| rs6896507  | 5 | 100739489 | 1.544  | 0.122651 | -0.436 | 0.662707 |
| rs6883027  | 5 | 100990247 | 1.527  | 0.126854 | -0.438 | 0.661481 |
| rs2657475  | 5 | 102036666 | 1.515  | 0.129836 | -0.369 | 0.712303 |
| rs73191279 | 5 | 103096646 | 1.505  | 0.132269 | -0.292 | 0.770536 |
| rs13358901 | 5 | 103775362 | 1.513  | 0.130383 | -0.261 | 0.79371  |
| rs7719837  | 5 | 104826962 | 1.535  | 0.12476  | -0.203 | 0.839295 |
| rs13359925 | 5 | 106005425 | 1.544  | 0.122616 | -0.14  | 0.889043 |
| rs163889   | 5 | 106876045 | 1.527  | 0.126834 | -0.196 | 0.844507 |
| rs11956871 | 5 | 107342391 | 1.504  | 0.13259  | -0.245 | 0.806091 |
| rs11241000 | 5 | 108565712 | 1.582  | 0.113584 | -0.082 | 0.934685 |
| rs60240456 | 5 | 108816195 | 1.595  | 0.110612 | -0.072 | 0.942947 |
| rs313617   | 5 | 109817549 | 1.505  | 0.132431 | -0.09  | 0.927977 |
| rs6594492  | 5 | 110355405 | 1.445  | 0.14856  | -0.092 | 0.926962 |
| rs3797725  | 5 | 111075728 | 1.362  | 0.173331 | -0.231 | 0.817395 |
| rs10515444 | 5 | 111749879 | 1.334  | 0.182302 | -0.253 | 0.800556 |
| rs509237   | 5 | 112550247 | 1.417  | 0.156344 | -0.143 | 0.886278 |
| rs11241230 | 5 | 113072475 | 1.44   | 0.149732 | -0.072 | 0.942553 |
| rs6864059  | 5 | 114029042 | 1.491  | 0.135897 | 0.105  | 0.916433 |
| rs6594908  | 5 | 115175503 | 1.493  | 0.135447 | 0.3    | 0.763864 |
| rs17142889 | 5 | 117041009 | 1.329  | 0.183861 | 0.653  | 0.513659 |
| rs6885532  | 5 | 117926778 | 1.231  | 0.218402 | 0.696  | 0.486407 |
| rs6897511  | 5 | 118636227 | 1.177  | 0.239326 | 0.676  | 0.498925 |
| rs1443985  | 5 | 119425507 | 1.19   | 0.234001 | 0.732  | 0.464352 |
| rs1990915  | 5 | 120267945 | 1.175  | 0.240018 | 0.757  | 0.449182 |
| rs10067980 | 5 | 121113088 | 1.073  | 0.283057 | 0.663  | 0.507216 |
| rs58888045 | 5 | 121588689 | 1.027  | 0.304299 | 0.641  | 0.521212 |
| rs1366337  | 5 | 122629266 | 0.967  | 0.333399 | 0.737  | 0.460972 |
| rs10040511 | 5 | 123715892 | 0.809  | 0.418236 | 0.38   | 0.703906 |
| rs6869617  | 5 | 124361588 | 0.566  | 0.571234 | 0.063  | 0.949516 |
| rs1480961  | 5 | 125440824 | 0.439  | 0.660896 | 0.072  | 0.9428   |
| rs28577201 | 5 | 125938263 | 0.357  | 0.721284 | -0.026 | 0.979355 |
| rs57808867 | 5 | 127120041 | 0.28   | 0.779277 | -0.114 | 0.90907  |
| rs1478446  | 5 | 127571899 | 0.267  | 0.789338 | -0.173 | 0.862919 |
| rs1990000  | 5 | 128750334 | 0.124  | 0.900969 | -0.354 | 0.723233 |
| rs10065536 | 5 | 129908196 | 0.021  | 0.983456 | -0.398 | 0.69029  |
| rs9327603  | 5 | 130558963 | -0.026 | 0.97937  | -0.423 | 0.672578 |

|            |   |           |        |           |        |           |
|------------|---|-----------|--------|-----------|--------|-----------|
| rs77937    | 5 | 131322294 | -0.05  | 0.95991   | -0.475 | 0.634445  |
| rs57586624 | 5 | 132074695 | 0.001  | 0.999412  | -0.424 | 0.671382  |
| rs878048   | 5 | 132602644 | -0.142 | 0.886758  | -0.402 | 0.687414  |
| rs192167   | 5 | 133439635 | 0.116  | 0.907265  | 0.321  | 0.748243  |
| rs73288874 | 5 | 134537897 | 0.281  | 0.778499  | 0.425  | 0.67105   |
| rs758459   | 5 | 134872704 | 0.441  | 0.658911  | 0.517  | 0.605139  |
| rs2347095  | 5 | 136004517 | 0.545  | 0.585543  | 0.546  | 0.585113  |
| rs12153513 | 5 | 136294407 | 0.583  | 0.559611  | 0.553  | 0.579924  |
| rs4835763  | 5 | 137427724 | 0.612  | 0.540343  | 0.564  | 0.572537  |
| rs1368374  | 5 | 138439801 | 0.644  | 0.519714  | 0.592  | 0.554079  |
| rs261532   | 5 | 138949362 | 0.692  | 0.4887    | 0.659  | 0.509942  |
| rs13171154 | 5 | 139761644 | 0.599  | 0.548928  | 0.688  | 0.49172   |
| rs251018   | 5 | 140902116 | 0.548  | 0.583415  | 0.756  | 0.449675  |
| rs7712868  | 5 | 142122418 | 0.088  | 0.929775  | 0.938  | 0.348006  |
| rs245827   | 5 | 142414681 | 0.07   | 0.944569  | 1.022  | 0.306722  |
| rs13169495 | 5 | 144625079 | -0.042 | 0.966252  | 1.297  | 0.19458   |
| rs6883434  | 5 | 145039897 | -0.044 | 0.964662  | 1.323  | 0.185741  |
| rs959627   | 5 | 146113492 | 0.027  | 0.978295  | 1.706  | 0.0879581 |
| rs6897123  | 5 | 146800340 | 0.049  | 0.960733  | 1.74   | 0.0819241 |
| rs7724380  | 5 | 147671850 | 0.024  | 0.980566  | 1.613  | 0.106698  |
| rs73274635 | 5 | 148191566 | -0.15  | 0.880509  | 1.546  | 0.122104  |
| rs73275620 | 5 | 149440851 | -0.17  | 0.865027  | 1.526  | 0.127015  |
| rs12109861 | 5 | 150130842 | -0.092 | 0.926402  | 1.553  | 0.120387  |
| rs17111939 | 5 | 150716364 | -0.085 | 0.93265   | 1.564  | 0.117706  |
| rs6890315  | 5 | 151656669 | -0.112 | 0.910644  | 1.554  | 0.120161  |
| rs2244977  | 5 | 152621660 | -0.091 | 0.927813  | 1.517  | 0.129388  |
| rs7709924  | 5 | 152966469 | -0.151 | 0.880301  | 1.464  | 0.143083  |
| rs13173061 | 5 | 153970243 | -0.301 | 0.763081  | 1.45   | 0.147153  |
| rs543868   | 5 | 154601398 | -0.307 | 0.759121  | 1.465  | 0.142915  |
| rs10070956 | 5 | 155488438 | -0.356 | 0.721535  | 1.454  | 0.14587   |
| rs17053941 | 5 | 156246511 | -0.341 | 0.733204  | 1.411  | 0.158383  |
| rs6880381  | 5 | 157095798 | -0.338 | 0.735275  | 1.383  | 0.166589  |
| rs2963482  | 5 | 157987219 | -0.409 | 0.682585  | 1.374  | 0.169369  |
| rs11955098 | 5 | 159129186 | -0.575 | 0.565329  | 1.404  | 0.16028   |
| rs6887783  | 5 | 159922209 | -0.927 | 0.353735  | 1.001  | 0.316903  |
| rs1849173  | 5 | 160731164 | -0.869 | 0.384665  | 1.054  | 0.291893  |
| rs1947991  | 5 | 161934200 | -0.79  | 0.429283  | 1.128  | 0.259311  |
| rs4551093  | 5 | 162652827 | -0.85  | 0.395398  | 1.053  | 0.292446  |
| rs56105963 | 5 | 163655632 | -1.016 | 0.309395  | 0.907  | 0.364341  |
| rs17324782 | 5 | 164306736 | -1.292 | 0.196258  | 0.612  | 0.540409  |
| rs9313307  | 5 | 165553143 | -1.596 | 0.11056   | 0.402  | 0.687639  |
| rs6555702  | 5 | 166004810 | -1.683 | 0.0923736 | 0.438  | 0.661738  |
| rs4546405  | 5 | 167095559 | -1.802 | 0.0715281 | 0.455  | 0.649137  |
| rs9313402  | 5 | 167657026 | -1.895 | 0.058045  | 0.374  | 0.708768  |
| rs968533   | 5 | 168699343 | -2.002 | 0.0452907 | 0.289  | 0.772304  |
| rs10063455 | 5 | 169639751 | -1.876 | 0.0607157 | 0.448  | 0.653873  |
| rs2161433  | 5 | 170170617 | -1.874 | 0.0609875 | 0.569  | 0.569387  |
| rs4867660  | 5 | 171402128 | -1.901 | 0.0573224 | 0.446  | 0.655294  |
| rs4867695  | 5 | 172392747 | -2.145 | 0.0319158 | -0.007 | 0.994374  |
| rs1992906  | 5 | 173182811 | -2.608 | 0.0091027 | -0.263 | 0.792902  |
| rs10067518 | 5 | 173642871 | -2.492 | 0.0127011 | -0.18  | 0.856816  |
| rs1875964  | 5 | 174484865 | -2.173 | 0.0297468 | 0.218  | 0.82716   |
| rs7711026  | 5 | 175150895 | -1.875 | 0.0608343 | 0.355  | 0.722255  |

|            |   |           |        |             |        |            |
|------------|---|-----------|--------|-------------|--------|------------|
| rs692713   | 5 | 176253435 | -1.875 | 0.0607636   | 0.343  | 0.731816   |
| rs2545801  | 5 | 176841339 | -2.147 | 0.0318114   | 0.398  | 0.690877   |
| rs262048   | 5 | 178006997 | -2.339 | 0.0193327   | 0.051  | 0.959111   |
| rs10059514 | 5 | 178673915 | -2.296 | 0.0216926   | 0.043  | 0.96599    |
| rs9687580  | 5 | 179580169 | -2.511 | 0.0120246   | -0.295 | 0.768045   |
| rs10313    | 5 | 180682405 | -2.362 | 0.0181942   | 0.027  | 0.978375   |
| rs9328070  | 6 | 234871    | -2.209 | 0.0271993   | -1.77  | 0.0767686  |
| rs4435987  | 6 | 1477709   | -1.862 | 0.0626438   | -1.518 | 0.129094   |
| rs3800158  | 6 | 2129301   | -1.801 | 0.0716612   | -1.575 | 0.115167   |
| rs9501948  | 6 | 3211787   | -1.708 | 0.0875601   | -1.499 | 0.133945   |
| rs9328202  | 6 | 3887339   | -1.637 | 0.101563    | -1.665 | 0.0958895  |
| rs395180   | 6 | 4768691   | -1.503 | 0.132805    | -1.484 | 0.137831   |
| rs22662    | 6 | 5183536   | -1.63  | 0.103079    | -1.556 | 0.119668   |
| rs3024354  | 6 | 6292430   | -1.75  | 0.0801247   | -1.6   | 0.109673   |
| rs4585612  | 6 | 7153152   | -2.136 | 0.0326976   | -2.046 | 0.0407344  |
| rs12662606 | 6 | 9096804   | -2.086 | 0.0369491   | -1.993 | 0.0462133  |
| rs2224660  | 6 | 10105007  | -2.337 | 0.0194583   | -2.024 | 0.0429497  |
| rs7753116  | 6 | 10661262  | -2.452 | 0.0142109   | -2.091 | 0.0364978  |
| rs1033424  | 6 | 11821750  | -2.901 | 0.00372017  | -2.46  | 0.0138897  |
| rs2504914  | 6 | 12607041  | -2.821 | 0.00478323  | -2.466 | 0.0136556  |
| rs2560756  | 6 | 13458662  | -2.845 | 0.00443512  | -2.515 | 0.0119193  |
| rs857455   | 6 | 14680107  | -3.149 | 0.00163558  | -2.78  | 0.00543615 |
| rs9464741  | 6 | 15024760  | -3.268 | 0.00108364  | -2.778 | 0.00546758 |
| rs2223256  | 6 | 16165644  | -3.216 | 0.00130217  | -2.41  | 0.015956   |
| rs1592047  | 6 | 17404165  | -2.871 | 0.00408778  | -1.604 | 0.108725   |
| rs9477600  | 6 | 18056273  | -2.883 | 0.00393766  | -1.314 | 0.188741   |
| rs13216194 | 6 | 18779046  | -2.995 | 0.00274841  | -1.173 | 0.240622   |
| rs9460408  | 6 | 19739943  | -3.099 | 0.00194443  | -1.021 | 0.307029   |
| rs2457341  | 6 | 20096220  | -3.118 | 0.0018184   | -0.915 | 0.359974   |
| rs12203023 | 6 | 21337783  | -3.246 | 0.00116888  | -0.648 | 0.516891   |
| rs11966463 | 6 | 22003895  | -3.367 | 0.00075888  | -0.515 | 0.606791   |
| rs9379479  | 6 | 23191842  | -3.649 | 0.000263413 | -0.361 | 0.718217   |
| rs10806986 | 6 | 24272240  | -3.776 | 0.000159129 | -0.324 | 0.745839   |
| rs2328893  | 6 | 25770239  | -4.127 | 3.66852E-05 | -0.353 | 0.723797   |
| rs9461252  | 6 | 26437453  | -4.123 | 3.73161E-05 | -0.235 | 0.814183   |
| rs1102565  | 6 | 27162175  | -4.154 | 3.26034E-05 | -0.164 | 0.869852   |
| rs276362   | 6 | 27938235  | -4.128 | 3.66234E-05 | -0.108 | 0.913807   |
| rs1159519  | 6 | 29043580  | -4.215 | 2.50291E-05 | -0.048 | 0.961553   |
| rs6456964  | 6 | 29502128  | -4.205 | 2.61649E-05 | -0.046 | 0.963029   |
| rs4713354  | 6 | 30685420  | -4.251 | 2.12599E-05 | -0.124 | 0.900967   |
| rs2259571  | 6 | 31583827  | -4.206 | 2.59874E-05 | -0.136 | 0.89186    |
| rs9267873  | 6 | 32199352  | -4.161 | 3.16968E-05 | -0.128 | 0.897869   |
| rs10214910 | 6 | 33037675  | -4.142 | 3.43709E-05 | -0.105 | 0.916767   |
| rs2451356  | 6 | 34045106  | -4.125 | 3.70562E-05 | -0.024 | 0.980734   |
| rs1535001  | 6 | 34927280  | -4.186 | 2.83818E-05 | -0.136 | 0.892047   |
| rs11962335 | 6 | 35441167  | -4.129 | 3.64835E-05 | -0.087 | 0.930649   |
| rs732394   | 6 | 36269084  | -3.873 | 0.000107457 | -0.015 | 0.988367   |
| rs195418   | 6 | 37327999  | -3.749 | 0.000177549 | 0.01   | 0.992363   |
| rs10807187 | 6 | 37629650  | -3.755 | 0.000173632 | -0.074 | 0.94068    |
| rs1678744  | 6 | 38816574  | -3.733 | 0.000189493 | -0.322 | 0.747244   |
| rs9349128  | 6 | 39788496  | -3.654 | 0.000257925 | -0.733 | 0.463424   |
| rs2038866  | 6 | 40257660  | -3.502 | 0.000461041 | -0.841 | 0.400232   |
| rs55932325 | 6 | 41164872  | -3.219 | 0.00128652  | -1.001 | 0.316896   |

|            |   |          |        |            |        |          |
|------------|---|----------|--------|------------|--------|----------|
| rs626442   | 6 | 42319734 | -2.974 | 0.002938   | -1.205 | 0.228357 |
| rs9369408  | 6 | 43332186 | -2.879 | 0.00399364 | -1.365 | 0.172287 |
| rs9357427  | 6 | 43977535 | -2.896 | 0.00378009 | -1.435 | 0.151212 |
| rs672627   | 6 | 44885786 | -2.735 | 0.00623276 | -1.325 | 0.185264 |
| rs9349324  | 6 | 45667018 | -2.55  | 0.0107688  | -1.161 | 0.245828 |
| rs10948304 | 6 | 46736559 | -2.335 | 0.0195467  | -0.728 | 0.466757 |
| rs6900354  | 6 | 47305301 | -2.239 | 0.0251423  | -0.606 | 0.54475  |
| rs1443628  | 6 | 48531489 | -2.361 | 0.0182143  | -0.429 | 0.667653 |
| rs1938180  | 6 | 48794919 | -2.351 | 0.0187133  | -0.423 | 0.672653 |
| rs628337   | 6 | 50011796 | -2.375 | 0.0175254  | -0.476 | 0.633794 |
| rs1327264  | 6 | 51169536 | -2.408 | 0.0160204  | -0.577 | 0.564205 |
| rs2397060  | 6 | 51611470 | -2.481 | 0.0130901  | -0.67  | 0.502704 |
| rs364932   | 6 | 52801687 | -2.381 | 0.0172888  | -0.526 | 0.598589 |
| rs9370260  | 6 | 53921674 | -2.254 | 0.0241955  | -0.425 | 0.670679 |
| rs9370288  | 6 | 54186562 | -2.242 | 0.024941   | -0.42  | 0.674575 |
| rs13203638 | 6 | 55217224 | -2.213 | 0.0268727  | -0.402 | 0.687835 |
| rs73746929 | 6 | 56538327 | -2.103 | 0.0354365  | -0.311 | 0.755934 |
| rs9367717  | 6 | 57161200 | -2.107 | 0.035116   | -0.304 | 0.760862 |
| rs1891818  | 6 | 58345052 | -2.111 | 0.0347673  | -0.294 | 0.768937 |
| rs9404644  | 6 | 58728413 | -2.112 | 0.0347289  | -0.29  | 0.77183  |
| rs9342637  | 6 | 62759028 | -2.099 | 0.0357861  | -0.318 | 0.750407 |
| rs9447253  | 6 | 63502269 | -2.115 | 0.034459   | -0.335 | 0.737503 |
| rs9341835  | 6 | 64126180 | -2.129 | 0.0332382  | -0.369 | 0.711917 |
| rs9444618  | 6 | 64880823 | -2.14  | 0.0323713  | -0.356 | 0.721659 |
| rs6901220  | 6 | 65495748 | -2.128 | 0.0333319  | -0.346 | 0.729306 |
| rs7775327  | 6 | 66345687 | -2.195 | 0.0281629  | -0.475 | 0.634491 |
| rs6918336  | 6 | 68698286 | -1.925 | 0.0541913  | -0.177 | 0.859842 |
| rs3971978  | 6 | 69207928 | -1.886 | 0.059352   | -0.192 | 0.848022 |
| rs6916748  | 6 | 70083244 | -1.864 | 0.0622547  | -0.18  | 0.856884 |
| rs2639291  | 6 | 71182013 | -1.886 | 0.0593238  | -0.169 | 0.865936 |
| rs9342825  | 6 | 71962755 | -2.229 | 0.0257951  | -0.363 | 0.71678  |
| rs2492970  | 6 | 73125530 | -2.533 | 0.0113182  | -0.529 | 0.596645 |
| rs9446852  | 6 | 73855610 | -2.632 | 0.00849729 | -0.52  | 0.603114 |
| rs525923   | 6 | 75065279 | -2.414 | 0.0157915  | -0.446 | 0.655405 |
| rs4706591  | 6 | 75682566 | -2.325 | 0.0200661  | -0.432 | 0.665571 |
| rs1341567  | 6 | 76628176 | -2.347 | 0.0189361  | -0.608 | 0.543066 |
| rs1490223  | 6 | 77142524 | -1.986 | 0.0469828  | -0.44  | 0.660268 |
| rs1936158  | 6 | 78184375 | -1.791 | 0.0733338  | -0.427 | 0.669158 |
| rs818286   | 6 | 79025588 | -1.642 | 0.100648   | -0.405 | 0.685677 |
| rs4706773  | 6 | 80036302 | -1.423 | 0.154867   | -0.354 | 0.72327  |
| rs509675   | 6 | 81218681 | -1.258 | 0.208505   | -0.428 | 0.668838 |
| rs12208769 | 6 | 81797142 | -1.187 | 0.235139   | -0.42  | 0.674635 |
| rs194621   | 6 | 82478870 | -1.113 | 0.265767   | -0.395 | 0.692543 |
| rs159054   | 6 | 83610839 | -0.967 | 0.333596   | -0.267 | 0.789342 |
| rs10806263 | 6 | 84490622 | -0.784 | 0.433208   | -0.185 | 0.853052 |
| rs1885632  | 6 | 85746881 | -0.488 | 0.62582    | -0.122 | 0.902666 |
| rs220429   | 6 | 86850735 | -0.465 | 0.642134   | -0.115 | 0.908305 |
| rs2211072  | 6 | 87320677 | -0.463 | 0.643416   | -0.115 | 0.908198 |
| rs2477307  | 6 | 88541622 | -0.514 | 0.607456   | -0.156 | 0.875762 |
| rs9362636  | 6 | 90026797 | -0.706 | 0.480346   | -0.444 | 0.657049 |
| rs2501720  | 6 | 90899561 | -0.846 | 0.397484   | -0.828 | 0.40769  |
| rs9444825  | 6 | 91779382 | -0.732 | 0.464356   | -0.723 | 0.469718 |
| rs2145532  | 6 | 92473270 | -0.685 | 0.493054   | -0.647 | 0.517722 |

|               |   |           |        |            |        |          |
|---------------|---|-----------|--------|------------|--------|----------|
| rs794672      | 6 | 95458317  | -0.584 | 0.559159   | -0.788 | 0.430747 |
| rs4840158     | 6 | 96380182  | -0.464 | 0.642788   | -0.647 | 0.517816 |
| rs9373829     | 6 | 96897201  | -0.381 | 0.703019   | -0.587 | 0.556909 |
| rs4397233     | 6 | 98104948  | -0.437 | 0.662447   | -0.465 | 0.64193  |
| rs12204275    | 6 | 99138875  | -0.429 | 0.667629   | -0.366 | 0.714615 |
| rs9495569     | 6 | 100241479 | -0.464 | 0.642973   | -0.294 | 0.768889 |
| rs9390702     | 6 | 101347446 | -0.576 | 0.564862   | -0.301 | 0.763492 |
| rs17062449    | 6 | 102198569 | -0.707 | 0.479564   | -0.314 | 0.753682 |
| rs59936445    | 6 | 102716987 | -0.762 | 0.446072   | -0.352 | 0.724568 |
| rs156236      | 6 | 104869938 | -0.868 | 0.385655   | -0.485 | 0.627569 |
| Affx-27339707 | 6 | 105973622 | -1.112 | 0.26622    | -0.645 | 0.518938 |
| rs11966261    | 6 | 106303274 | -1.211 | 0.22597    | -0.596 | 0.550869 |
| rs311209      | 6 | 107429438 | -1.716 | 0.0861858  | -1.007 | 0.313834 |
| rs56237735    | 6 | 108375468 | -1.834 | 0.0667227  | -1.097 | 0.27261  |
| rs9486916     | 6 | 109013930 | -1.691 | 0.0907467  | -0.941 | 0.346634 |
| rs9386887     | 6 | 110647920 | -1.612 | 0.107041   | -0.636 | 0.524645 |
| rs4947122     | 6 | 111870090 | -1.358 | 0.174451   | -0.369 | 0.712184 |
| rs9481192     | 6 | 112130478 | -1.317 | 0.187928   | -0.33  | 0.741189 |
| rs4945917     | 6 | 113151042 | -1.444 | 0.14863    | -0.532 | 0.594885 |
| rs750611      | 6 | 113827383 | -1.601 | 0.10945    | -0.699 | 0.484508 |
| rs785136      | 6 | 114638527 | -1.714 | 0.0865419  | -0.833 | 0.404617 |
| rs35785903    | 6 | 115317091 | -1.723 | 0.0849021  | -0.838 | 0.401977 |
| rs6939511     | 6 | 116069512 | -1.761 | 0.078279   | -0.924 | 0.35525  |
| rs2858831     | 6 | 116776593 | -1.802 | 0.0716051  | -0.963 | 0.335328 |
| rs12200948    | 6 | 118016513 | -1.929 | 0.0537555  | -0.976 | 0.328969 |
| rs9372523     | 6 | 119460786 | -1.948 | 0.0514044  | -0.893 | 0.371894 |
| rs218857      | 6 | 121380150 | -1.932 | 0.0533603  | -0.804 | 0.421391 |
| rs2679672     | 6 | 122313558 | -1.902 | 0.0571252  | -0.794 | 0.427356 |
| rs7747204     | 6 | 123416837 | -2.104 | 0.0353547  | -0.96  | 0.337156 |
| rs2243392     | 6 | 125598199 | -2.58  | 0.00987218 | -1.227 | 0.219979 |
| rs7763104     | 6 | 126393517 | -2.716 | 0.00661316 | -1.173 | 0.240876 |
| rs9401921     | 6 | 127246737 | -2.735 | 0.00623447 | -1.089 | 0.276232 |
| rs7751575     | 6 | 128343150 | -2.783 | 0.00538731 | -1.037 | 0.299657 |
| rs953549      | 6 | 128709493 | -2.811 | 0.00494039 | -1.038 | 0.2991   |
| rs9385484     | 6 | 129610581 | -2.997 | 0.00272601 | -1.123 | 0.261248 |
| rs9492525     | 6 | 130608255 | -3.024 | 0.00249342 | -1.063 | 0.287949 |
| rs2078265     | 6 | 131761677 | -3.109 | 0.00187429 | -1.065 | 0.286765 |
| rs9493257     | 6 | 132586747 | -3.117 | 0.00182509 | -0.986 | 0.324093 |
| rs58777641    | 6 | 133456208 | -2.981 | 0.00286867 | -0.77  | 0.441305 |
| rs9689446     | 6 | 134461443 | -2.699 | 0.00695624 | -0.631 | 0.528159 |
| rs1052502     | 6 | 135606565 | -2.125 | 0.033591   | -0.431 | 0.666737 |
| rs7753890     | 6 | 136516257 | -2.199 | 0.0278529  | -0.424 | 0.671857 |
| rs381783      | 6 | 137337096 | -2.207 | 0.0272999  | -0.272 | 0.785407 |
| rs1333228     | 6 | 137827238 | -2.208 | 0.0272525  | -0.179 | 0.857556 |
| rs9495126     | 6 | 138876411 | -2.096 | 0.0360389  | -0.167 | 0.867017 |
| rs12202850    | 6 | 140319754 | -2.233 | 0.0255405  | -0.452 | 0.651323 |
| rs11155154    | 6 | 141348942 | -2.238 | 0.0252087  | -0.462 | 0.64384  |
| rs7755011     | 6 | 142290671 | -2.223 | 0.0261877  | -0.399 | 0.68986  |
| rs6570507     | 6 | 142679572 | -2.251 | 0.0243987  | -0.337 | 0.736262 |
| rs7760371     | 6 | 143712252 | -2.523 | 0.0116506  | -0.24  | 0.810639 |
| rs7769992     | 6 | 144038185 | -2.598 | 0.00937901 | -0.28  | 0.779303 |
| rs6570644     | 6 | 145091031 | -2.597 | 0.00941548 | -0.429 | 0.667685 |
| rs4896780     | 6 | 145517407 | -2.555 | 0.0106268  | -0.425 | 0.670887 |



|             |   |           |        |             |        |           |
|-------------|---|-----------|--------|-------------|--------|-----------|
| rs362834    | 6 | 146662819 | -2.273 | 0.0230166   | -0.348 | 0.728209  |
| rs9485144   | 6 | 147435953 | -2.067 | 0.0387296   | -0.323 | 0.746404  |
| rs1523965   | 6 | 147987530 | -1.962 | 0.0497351   | -0.433 | 0.665176  |
| rs73597031  | 6 | 149029558 | -1.488 | 0.136627    | -0.37  | 0.711659  |
| rs60226016  | 6 | 150181602 | -1.198 | 0.231004    | -0.249 | 0.803217  |
| rs505358    | 6 | 151327848 | -0.624 | 0.532525    | -0.016 | 0.987175  |
| rs6925996   | 6 | 151910904 | 0.068  | 0.945798    | 0.152  | 0.879327  |
| rs7756085   | 6 | 152854008 | 0.28   | 0.779761    | 0.161  | 0.871765  |
| rs3935973   | 6 | 153924581 | 0.377  | 0.706192    | 0.085  | 0.932156  |
| rs9397202   | 6 | 155085094 | 0.516  | 0.606094    | -0.037 | 0.970096  |
| rs73575610  | 6 | 155443933 | 0.431  | 0.66677     | -0.08  | 0.935952  |
| rs6557488   | 6 | 156601505 | 0.314  | 0.75323     | -0.104 | 0.916876  |
| rs9478713   | 6 | 156858504 | 0.219  | 0.826824    | -0.135 | 0.892583  |
| rs112198222 | 6 | 158048381 | -0.126 | 0.899549    | -0.341 | 0.732735  |
| rs1979541   | 6 | 159105413 | -0.551 | 0.581454    | -0.531 | 0.595471  |
| rs869898    | 6 | 159799736 | -0.501 | 0.616293    | -0.307 | 0.758774  |
| rs7755463   | 6 | 161012270 | -0.36  | 0.718945    | -0.003 | 0.997693  |
| rs6934779   | 6 | 162148061 | -0.238 | 0.811793    | 0.108  | 0.913853  |
| rs9347598   | 6 | 162608012 | -0.183 | 0.855104    | 0.331  | 0.740737  |
| rs73609755  | 6 | 163423373 | 0.091  | 0.927447    | 0.784  | 0.433191  |
| rs7759125   | 6 | 164642530 | -0.078 | 0.937571    | 0.78   | 0.435267  |
| rs569815    | 6 | 165910263 | -0.075 | 0.939886    | 1.008  | 0.313229  |
| rs56171280  | 6 | 166835794 | 0.462  | 0.644058    | 1.509  | 0.131235  |
| rs9366065   | 6 | 167267504 | 0.43   | 0.667532    | 1.374  | 0.169447  |
| rs6455484   | 6 | 168506045 | 0.175  | 0.861272    | 1.3    | 0.1937    |
| rs6930377   | 6 | 169656029 | -0.195 | 0.845099    | 0.984  | 0.324961  |
| rs7769343   | 6 | 170517906 | -0.323 | 0.746537    | 0.841  | 0.400399  |
| rs73258675  | 6 | 170908114 | -0.32  | 0.749057    | 0.861  | 0.389347  |
| rs1568773   | 7 | 1248880   | 3.038  | 0.00238536  | 0.682  | 0.495057  |
| rs6968659   | 7 | 2133914   | 3.203  | 0.0013589   | 0.822  | 0.411095  |
| rs11769469  | 7 | 2705266   | 3.338  | 0.000844876 | 0.933  | 0.350919  |
| rs6962058   | 7 | 3931537   | 3.209  | 0.0013306   | 0.931  | 0.352028  |
| rs6949735   | 7 | 5832785   | 2.31   | 0.0208743   | 0.4    | 0.689452  |
| rs7786706   | 7 | 6747267   | 2.177  | 0.0295122   | 0.404  | 0.686209  |
| rs2109973   | 7 | 7941645   | 1.706  | 0.0880776   | 0.71   | 0.477468  |
| rs4582462   | 7 | 8321494   | 1.387  | 0.16539     | 0.616  | 0.537604  |
| rs7807795   | 7 | 9279030   | 1.379  | 0.167755    | 0.912  | 0.361663  |
| rs7798735   | 7 | 10146577  | 1.143  | 0.252898    | 0.568  | 0.569914  |
| rs1483200   | 7 | 10981381  | 1.096  | 0.273159    | 0.594  | 0.552594  |
| rs1526520   | 7 | 11779718  | 0.936  | 0.34928     | 0.512  | 0.608948  |
| rs35472397  | 7 | 12331890  | 1.068  | 0.285631    | 0.585  | 0.558732  |
| rs10234195  | 7 | 13283419  | 1.177  | 0.239145    | 0.652  | 0.514429  |
| rs10238440  | 7 | 14092993  | 1.071  | 0.284102    | 0.591  | 0.554711  |
| rs818500    | 7 | 16723122  | 0.097  | 0.922749    | 0.025  | 0.979857  |
| rs1448672   | 7 | 17621253  | -0.169 | 0.865533    | -0.186 | 0.852348  |
| rs10272939  | 7 | 18723446  | -0.632 | 0.527649    | -0.475 | 0.634949  |
| rs2965030   | 7 | 19065012  | -0.707 | 0.479428    | -0.495 | 0.620479  |
| rs244519    | 7 | 20075302  | -1.209 | 0.226473    | -0.779 | 0.436155  |
| rs10950838  | 7 | 21143998  | -1.407 | 0.159301    | -1.038 | 0.299339  |
| rs2965404   | 7 | 21749502  | -1.439 | 0.150176    | -1.097 | 0.272543  |
| rs28572782  | 7 | 22907940  | -1.664 | 0.0961271   | -1.401 | 0.161097  |
| rs187985    | 7 | 23426232  | -1.64  | 0.100943    | -1.491 | 0.135955  |
| rs985062    | 7 | 24616474  | -1.877 | 0.0605377   | -1.931 | 0.0534813 |

|               |   |          |        |           |        |           |
|---------------|---|----------|--------|-----------|--------|-----------|
| rs765114      | 7 | 25316682 | -1.866 | 0.0620339 | -1.999 | 0.0456191 |
| rs7788641     | 7 | 26120809 | -1.644 | 0.100113  | -2.007 | 0.0447202 |
| rs1012803     | 7 | 26688808 | -1.539 | 0.123869  | -1.956 | 0.0504674 |
| rs6980308     | 7 | 27549788 | -1.417 | 0.156398  | -1.932 | 0.0534028 |
| rs6963763     | 7 | 28126077 | -1.2   | 0.230185  | -1.955 | 0.0505291 |
| rs10274233    | 7 | 28949779 | -0.981 | 0.326733  | -2.032 | 0.042105  |
| rs11973108    | 7 | 29425836 | -0.663 | 0.50748   | -2.022 | 0.0431794 |
| rs6958536     | 7 | 30302577 | -0.595 | 0.551711  | -2.069 | 0.0385881 |
| rs7795940     | 7 | 31053159 | -0.943 | 0.345752  | -2.055 | 0.0398785 |
| rs7787167     | 7 | 31789186 | -0.873 | 0.38251   | -1.992 | 0.0463573 |
| rs1376277     | 7 | 32455882 | -0.644 | 0.519464  | -1.725 | 0.0844801 |
| rs2598385     | 7 | 33646140 | -0.427 | 0.669732  | -1.671 | 0.0946584 |
| rs7810092     | 7 | 34396630 | -0.274 | 0.784065  | -1.501 | 0.13326   |
| rs2392375     | 7 | 35639314 | -0.539 | 0.589932  | -1.569 | 0.116752  |
| rs12701506    | 7 | 36566020 | -0.512 | 0.608439  | -1.571 | 0.116274  |
| rs4602779     | 7 | 37190927 | -0.611 | 0.541486  | -1.456 | 0.145364  |
| rs1860521     | 7 | 38331504 | -0.847 | 0.397047  | -1.481 | 0.138487  |
| rs859520      | 7 | 38972696 | -0.926 | 0.354685  | -1.518 | 0.129074  |
| Affx-30437429 | 7 | 40167762 | -0.859 | 0.390582  | -1.397 | 0.162343  |
| rs12701888    | 7 | 41417008 | -0.782 | 0.434138  | -1.276 | 0.202098  |
| rs6463077     | 7 | 41988158 | -0.739 | 0.459796  | -1.109 | 0.26748   |
| rs607148      | 7 | 42906793 | -0.429 | 0.668236  | -0.856 | 0.392047  |
| rs10264353    | 7 | 43321077 | -0.384 | 0.700646  | -0.863 | 0.388048  |
| rs2971681     | 7 | 44183187 | -0.337 | 0.736319  | -0.885 | 0.376301  |
| rs9768229     | 7 | 44698759 | -0.444 | 0.656811  | -1.06  | 0.289214  |
| rs2471257     | 7 | 45715714 | -0.546 | 0.585061  | -1.217 | 0.223468  |
| rs7786479     | 7 | 46492545 | -0.471 | 0.637438  | -1.134 | 0.256973  |
| rs73334643    | 7 | 47641563 | -0.564 | 0.572956  | -1.158 | 0.246717  |
| rs73333662    | 7 | 47922317 | -0.539 | 0.589847  | -1.114 | 0.265113  |
| rs6583519     | 7 | 49167075 | -0.627 | 0.530551  | -1.189 | 0.234329  |
| rs691878      | 7 | 49895102 | -0.639 | 0.523061  | -1.207 | 0.227603  |
| rs28470699    | 7 | 50782440 | -0.497 | 0.619029  | -1.12  | 0.262575  |
| rs1917269     | 7 | 51528084 | -0.381 | 0.702981  | -1.097 | 0.272568  |
| rs1035042     | 7 | 52452724 | -0.175 | 0.861258  | -1.152 | 0.249316  |
| rs12718810    | 7 | 53693021 | 0.025  | 0.980198  | -1.029 | 0.303268  |
| rs2709317     | 7 | 54866805 | 0.095  | 0.924141  | -0.965 | 0.33471   |
| rs11982736    | 7 | 55855180 | 0.102  | 0.918459  | -0.98  | 0.327075  |
| rs7810009     | 7 | 56344705 | 0.15   | 0.880944  | -0.923 | 0.356252  |
| rs9886282     | 7 | 57228980 | 0.266  | 0.790382  | -0.825 | 0.40951   |
| rs4134013     | 7 | 57716681 | 0.322  | 0.74749   | -0.787 | 0.431408  |
| rs62456919    | 7 | 61834694 | 0.488  | 0.625266  | -0.649 | 0.516229  |
| rs28628151    | 7 | 62676413 | 0.535  | 0.592854  | -0.605 | 0.545112  |
| rs7807240     | 7 | 63326660 | 0.533  | 0.593713  | -0.598 | 0.549993  |
| rs2862876     | 7 | 64101034 | 0.496  | 0.619984  | -0.597 | 0.550587  |
| rs73699675    | 7 | 64771511 | 0.465  | 0.642161  | -0.6   | 0.548184  |
| rs59470704    | 7 | 65420083 | 0.454  | 0.649901  | -0.589 | 0.555543  |
| rs11771318    | 7 | 66062480 | 0.448  | 0.654012  | -0.569 | 0.569499  |
| rs6976662     | 7 | 66882653 | 0.302  | 0.763005  | -0.583 | 0.559802  |
| rs7803186     | 7 | 67679961 | -0.122 | 0.903143  | -0.748 | 0.454233  |
| rs4339527     | 7 | 68860360 | -0.8   | 0.423861  | -0.939 | 0.34751   |
| rs12672930    | 7 | 69783198 | -0.964 | 0.33492   | -1.034 | 0.301035  |
| rs17520733    | 7 | 70649789 | -0.944 | 0.34508   | -0.947 | 0.343541  |
| rs599574      | 7 | 71138528 | -0.933 | 0.350998  | -0.722 | 0.470379  |

|               |   |           |        |             |        |            |
|---------------|---|-----------|--------|-------------|--------|------------|
| rs7790280     | 7 | 71929399  | -0.982 | 0.326078    | -0.585 | 0.558414   |
| rs4717763     | 7 | 72825125  | -0.993 | 0.32073     | -0.504 | 0.614489   |
| rs6460065     | 7 | 73376167  | -1.12  | 0.262795    | -0.573 | 0.566814   |
| rs10280764    | 7 | 74489889  | -1.193 | 0.232699    | -0.546 | 0.584858   |
| rs1179640     | 7 | 75238617  | -1.232 | 0.217964    | -0.487 | 0.626216   |
| rs11772114    | 7 | 75853723  | -1.302 | 0.192939    | -0.509 | 0.610957   |
| rs12668330    | 7 | 76876736  | -1.388 | 0.165058    | -0.526 | 0.599085   |
| rs2110871     | 7 | 78080548  | -1.385 | 0.166115    | -0.578 | 0.562975   |
| rs4020771     | 7 | 78777397  | -1.37  | 0.170761    | -0.562 | 0.574402   |
| rs13237436    | 7 | 79875818  | -1.483 | 0.138154    | -0.645 | 0.518998   |
| rs2525776     | 7 | 80901619  | -1.751 | 0.0798664   | -0.653 | 0.514046   |
| rs2367841     | 7 | 81672259  | -1.949 | 0.0513171   | -0.719 | 0.472132   |
| rs12537056    | 7 | 82875924  | -1.86  | 0.0628255   | -0.571 | 0.56768    |
| rs1990427     | 7 | 83471330  | -1.721 | 0.0851884   | -0.477 | 0.633553   |
| rs9642183     | 7 | 84164457  | -1.615 | 0.10641     | -0.457 | 0.648012   |
| rs7807771     | 7 | 85148963  | -1.674 | 0.0941899   | -0.548 | 0.583968   |
| rs12533844    | 7 | 86188367  | -1.755 | 0.0792164   | -0.598 | 0.550011   |
| rs1202283     | 7 | 87082292  | -1.837 | 0.0662611   | -0.648 | 0.516964   |
| rs6951860     | 7 | 88225527  | -1.921 | 0.0546971   | -0.7   | 0.484075   |
| rs259139      | 7 | 89623846  | -2.01  | 0.0443987   | -0.771 | 0.440508   |
| rs10488004    | 7 | 90758236  | -2.196 | 0.0281059   | -0.945 | 0.344668   |
| rs7786981     | 7 | 91170636  | -2.209 | 0.027157    | -1.036 | 0.299979   |
| rs11772579    | 7 | 92176640  | -2.235 | 0.025428    | -1.184 | 0.236469   |
| rs10257459    | 7 | 92521890  | -2.216 | 0.0266798   | -1.2   | 0.230041   |
| rs9986922     | 7 | 93720528  | -1.965 | 0.0494007   | -1.143 | 0.253158   |
| rs73423250    | 7 | 94193368  | -1.978 | 0.0479405   | -1.176 | 0.239586   |
| rs73422040    | 7 | 94972055  | -1.995 | 0.0460319   | -1.123 | 0.261504   |
| rs6970192     | 7 | 96139931  | -2.008 | 0.0446843   | -1.036 | 0.300081   |
| rs2023783     | 7 | 97160675  | -2.021 | 0.0433283   | -0.826 | 0.409003   |
| rs817771      | 7 | 98225036  | -2.176 | 0.0295738   | -0.8   | 0.423847   |
| rs28608208    | 7 | 98870997  | -2.096 | 0.0360866   | -0.724 | 0.46906    |
| rs28449324    | 7 | 99483867  | -2.09  | 0.0365989   | -0.797 | 0.425304   |
| rs4729624     | 7 | 100529261 | -2.221 | 0.0263612   | -0.851 | 0.394901   |
| rs869127      | 7 | 101091470 | -2.292 | 0.0219239   | -0.899 | 0.368777   |
| rs10251993    | 7 | 103049477 | -2.58  | 0.0098889   | -0.996 | 0.319346   |
| Affx-29393621 | 7 | 103681973 | -2.692 | 0.00710397  | -1.118 | 0.263479   |
| rs6949139     | 7 | 104539890 | -2.825 | 0.00473073  | -1.225 | 0.220495   |
| rs4730125     | 7 | 105656840 | -3.008 | 0.00262723  | -1.625 | 0.104083   |
| rs2536505     | 7 | 106714165 | -2.98  | 0.00288098  | -1.919 | 0.0549745  |
| rs2286251     | 7 | 107702877 | -3.064 | 0.00218677  | -2.141 | 0.0322818  |
| rs7781125     | 7 | 108464460 | -3.06  | 0.00220997  | -2.197 | 0.0280002  |
| rs2107169     | 7 | 109557851 | -3.066 | 0.00217159  | -2.196 | 0.0280781  |
| rs10155808    | 7 | 110278031 | -3.28  | 0.00103939  | -2.295 | 0.0217049  |
| rs73436217    | 7 | 111466461 | -3.244 | 0.0011806   | -2.233 | 0.0255402  |
| rs4730566     | 7 | 112612459 | -3.227 | 0.00125071  | -2.179 | 0.0293437  |
| rs6466460     | 7 | 113294567 | -3.318 | 0.000905996 | -2.161 | 0.0307268  |
| rs1448349     | 7 | 114435347 | -3.427 | 0.000609906 | -2.21  | 0.0270813  |
| rs6466551     | 7 | 115334966 | -3.425 | 0.000613912 | -2.234 | 0.0254724  |
| rs10226193    | 7 | 116292034 | -3.633 | 0.000280607 | -2.486 | 0.0129029  |
| rs28626909    | 7 | 117435964 | -3.805 | 0.000141777 | -2.56  | 0.0104527  |
| rs6977576     | 7 | 118092961 | -3.831 | 0.000127533 | -2.547 | 0.0108745  |
| rs7796215     | 7 | 119090268 | -3.816 | 0.000135797 | -2.587 | 0.00969522 |
| rs2525743     | 7 | 120565264 | -3.787 | 0.000152668 | -2.659 | 0.00784684 |

|            |   |           |        |             |        |            |
|------------|---|-----------|--------|-------------|--------|------------|
| rs2707486  | 7 | 121053376 | -3.749 | 0.000177679 | -2.611 | 0.00903888 |
| rs62474315 | 7 | 121856549 | -3.646 | 0.000266052 | -2.602 | 0.00926989 |
| rs6945685  | 7 | 122871499 | -3.468 | 0.000524261 | -2.488 | 0.0128528  |
| rs6963923  | 7 | 123971770 | -3.14  | 0.00169068  | -2.268 | 0.0233215  |
| rs1012347  | 7 | 125388062 | -2.79  | 0.00526888  | -2.159 | 0.0308414  |
| rs10248873 | 7 | 126411651 | -2.792 | 0.00523383  | -2.25  | 0.0244197  |
| rs1419391  | 7 | 126924753 | -2.749 | 0.00598566  | -2.261 | 0.02375    |
| rs4728090  | 7 | 127830114 | -2.712 | 0.00668113  | -2.234 | 0.0255022  |
| rs2029623  | 7 | 128507297 | -2.577 | 0.00995748  | -2.188 | 0.028677   |
| rs35787906 | 7 | 129405737 | -2.509 | 0.0121121   | -2.323 | 0.0201991  |
| rs13225903 | 7 | 130114227 | -2.565 | 0.0103212   | -2.441 | 0.0146366  |
| rs350650   | 7 | 130717723 | -2.614 | 0.0089375   | -2.456 | 0.0140401  |
| rs2598198  | 7 | 131830086 | -2.313 | 0.0207065   | -2.346 | 0.0189754  |
| rs2288967  | 7 | 132102811 | -2.2   | 0.027775    | -2.342 | 0.0191795  |
| rs1030267  | 7 | 133225548 | -1.852 | 0.0640973   | -2.07  | 0.0384509  |
| rs4732112  | 7 | 134970088 | -1.622 | 0.104752    | -1.934 | 0.0531391  |
| rs11981088 | 7 | 135451460 | -1.313 | 0.189114    | -1.629 | 0.103338   |
| rs2350179  | 7 | 136323977 | -0.859 | 0.390612    | -1.378 | 0.168204   |
| rs10235991 | 7 | 137349814 | -0.321 | 0.748222    | -0.941 | 0.346906   |
| rs10954631 | 7 | 138539626 | -0.091 | 0.927157    | -0.313 | 0.754189   |
| rs2249070  | 7 | 138872345 | -0.101 | 0.919461    | -0.309 | 0.757075   |
| rs2471278  | 7 | 139937838 | -0.415 | 0.677871    | -0.444 | 0.657315   |
| rs1267610  | 7 | 140525883 | -0.516 | 0.606015    | -0.442 | 0.658666   |
| rs1985729  | 7 | 141694805 | -0.988 | 0.323331    | -0.764 | 0.445026   |
| rs1880559  | 7 | 143198796 | -1.074 | 0.282777    | -0.769 | 0.441725   |
| rs4726747  | 7 | 144883188 | -1.33  | 0.183538    | -0.914 | 0.360537   |
| rs344454   | 7 | 146401434 | -1.712 | 0.0868318   | -1.171 | 0.241642   |
| rs12703960 | 7 | 147427272 | -1.233 | 0.217553    | -0.627 | 0.53036    |
| rs10271133 | 7 | 148480990 | -1.028 | 0.303847    | -0.088 | 0.929496   |
| rs73465749 | 7 | 149644995 | -0.991 | 0.321759    | 0.048  | 0.96164    |
| rs10226279 | 7 | 150494989 | -0.977 | 0.328413    | 0.08   | 0.936212   |
| rs58295063 | 7 | 151240486 | -0.833 | 0.404572    | 0.175  | 0.860742   |
| rs57618766 | 7 | 152211627 | -0.897 | 0.369547    | 0.05   | 0.960477   |
| rs9632657  | 7 | 153386018 | -0.773 | 0.439803    | 0.202  | 0.839536   |
| rs10228095 | 7 | 154058755 | -0.431 | 0.666249    | 0.528  | 0.597668   |
| rs7810743  | 7 | 155855974 | -0.873 | 0.38277     | -0.63  | 0.528761   |
| rs35629295 | 7 | 156822706 | -0.637 | 0.523889    | -0.485 | 0.627901   |
| rs13251150 | 8 | 326716    | -0.444 | 0.65713     | -0.118 | 0.906451   |
| rs12542312 | 8 | 1439795   | -0.397 | 0.691649    | 0.059  | 0.95321    |
| rs4641096  | 8 | 2622713   | -0.539 | 0.589748    | 0.15   | 0.880614   |
| rs9314485  | 8 | 3178721   | -0.779 | 0.435788    | -0.095 | 0.92454    |
| rs10107472 | 8 | 4190874   | -0.711 | 0.477039    | 0.032  | 0.974301   |
| rs7015708  | 8 | 5051931   | -0.746 | 0.455533    | 0.117  | 0.906652   |
| rs10780175 | 8 | 6218289   | -0.871 | 0.383731    | 0.177  | 0.859866   |
| rs2738063  | 8 | 6700883   | -0.797 | 0.425646    | 0.29   | 0.771756   |
| rs11993541 | 8 | 8205287   | -0.507 | 0.61196     | 0.473  | 0.63609    |
| rs922053   | 8 | 9250346   | -0.505 | 0.613479    | 0.439  | 0.66066    |
| rs4289770  | 8 | 10487222  | -0.732 | 0.464238    | 0.195  | 0.845514   |
| rs6601548  | 8 | 10888096  | -0.782 | 0.434072    | 0.104  | 0.917341   |
| rs78432338 | 8 | 11905325  | -0.521 | 0.602202    | 0.14   | 0.888685   |
| rs2460362  | 8 | 12913259  | -0.088 | 0.930037    | 0.398  | 0.690367   |
| rs13261147 | 8 | 13903756  | 0.043  | 0.965961    | 0.57   | 0.568468   |
| rs2256810  | 8 | 14646209  | 0.029  | 0.976824    | 0.53   | 0.595787   |

|               |   |          |        |           |        |          |
|---------------|---|----------|--------|-----------|--------|----------|
| rs962040      | 8 | 15311877 | -0.02  | 0.984356  | 0.51   | 0.61016  |
| Affx-31819032 | 8 | 15992000 | -0.125 | 0.900421  | 0.444  | 0.656996 |
| rs4922233     | 8 | 16639069 | -0.373 | 0.709023  | 0.295  | 0.768319 |
| rs2720475     | 8 | 17453539 | -0.578 | 0.563454  | 0.231  | 0.817235 |
| rs755683      | 8 | 18560687 | -0.495 | 0.62042   | 0.599  | 0.549382 |
| rs6998991     | 8 | 19366005 | -0.545 | 0.585802  | 0.39   | 0.696326 |
| rs57642095    | 8 | 20318494 | -0.582 | 0.560457  | 0.245  | 0.8065   |
| rs2631929     | 8 | 21054745 | -0.554 | 0.579886  | 0.039  | 0.968857 |
| rs6558052     | 8 | 22273687 | -0.057 | 0.954436  | 0.198  | 0.8433   |
| rs2457421     | 8 | 22767536 | 0.075  | 0.94023   | 0.145  | 0.884438 |
| Affx-31946199 | 8 | 24003241 | 0.215  | 0.82975   | 0.064  | 0.949207 |
| rs2979703     | 8 | 24736025 | 0.348  | 0.727677  | 0.082  | 0.934884 |
| rs56184717    | 8 | 25735330 | 0.34   | 0.733605  | 0.087  | 0.930985 |
| rs3808564     | 8 | 26438546 | 0.378  | 0.705429  | -0.009 | 0.992611 |
| rs28722859    | 8 | 27342353 | 0.351  | 0.725635  | -0.14  | 0.888566 |
| rs2722892     | 8 | 28163935 | 0.393  | 0.694451  | -0.011 | 0.991614 |
| rs11136067    | 8 | 29305308 | 0.41   | 0.681527  | 0.039  | 0.968688 |
| rs1123983     | 8 | 30129876 | 0.708  | 0.478809  | 0.151  | 0.879826 |
| rs12156104    | 8 | 30607671 | 0.999  | 0.318022  | 0.39   | 0.6968   |
| rs10447953    | 8 | 31478718 | 1.077  | 0.281485  | 0.479  | 0.631944 |
| rs10954820    | 8 | 31895912 | 1.079  | 0.280716  | 0.527  | 0.598502 |
| rs10808333    | 8 | 33068303 | 0.992  | 0.321094  | 0.522  | 0.601595 |
| rs7832021     | 8 | 33462084 | 0.975  | 0.329448  | 0.504  | 0.614325 |
| rs6468276     | 8 | 34566664 | 0.934  | 0.350463  | 0.481  | 0.630337 |
| rs6987006     | 8 | 35803681 | 0.898  | 0.36898   | 0.418  | 0.676136 |
| rs12334897    | 8 | 36628280 | 0.912  | 0.361835  | 0.419  | 0.675408 |
| rs4739524     | 8 | 37445508 | 0.837  | 0.402719  | 0.384  | 0.700627 |
| rs4733951     | 8 | 38369831 | 1.383  | 0.166716  | 0.372  | 0.709816 |
| rs12678074    | 8 | 39008680 | 1.34   | 0.180266  | 0.259  | 0.795289 |
| rs899979      | 8 | 39991573 | 1.571  | 0.116128  | 0.221  | 0.824853 |
| rs2722458     | 8 | 40406322 | 1.603  | 0.108975  | 0.215  | 0.82979  |
| rs7839782     | 8 | 41655758 | 1.569  | 0.11671   | 0.113  | 0.910148 |
| rs2974316     | 8 | 42465911 | 1.554  | 0.120288  | 0.095  | 0.924423 |
| rs4737097     | 8 | 43262553 | 1.546  | 0.122031  | 0.045  | 0.964313 |
| rs4872972     | 8 | 47799712 | 1.587  | 0.112519  | 0.013  | 0.989277 |
| rs4873779     | 8 | 49031831 | 1.59   | 0.111874  | 0.011  | 0.991557 |
| rs9657079     | 8 | 49753613 | 1.683  | 0.0923101 | 0.123  | 0.902216 |
| rs1552379     | 8 | 50787073 | 1.716  | 0.0862032 | 0.246  | 0.805427 |
| rs4617166     | 8 | 51516341 | 1.498  | 0.134014  | 0.206  | 0.837134 |
| rs5003717     | 8 | 52693141 | 1.203  | 0.22888   | 0.284  | 0.776362 |
| rs890598      | 8 | 53239522 | 0.707  | 0.479825  | 0.322  | 0.747682 |
| rs7008165     | 8 | 54431866 | 0.14   | 0.888616  | -0.021 | 0.983636 |
| rs4236946     | 8 | 55914515 | 0.195  | 0.845562  | 0.195  | 0.845714 |
| rs13439780    | 8 | 56344186 | 0.279  | 0.780025  | 0.275  | 0.783579 |
| rs16920543    | 8 | 57311502 | 0.247  | 0.805057  | 0.295  | 0.768003 |
| rs2318115     | 8 | 58218269 | 0.058  | 0.953507  | 0.091  | 0.927096 |
| rs1836773     | 8 | 58823258 | -0.108 | 0.914324  | 0.044  | 0.964802 |
| rs9792192     | 8 | 59985792 | -0.078 | 0.938198  | 0.244  | 0.806856 |
| rs13280933    | 8 | 60308317 | -0.198 | 0.843433  | 0.28   | 0.779638 |
| rs1866694     | 8 | 62172668 | -0.271 | 0.786624  | 0.575  | 0.565072 |
| rs344201      | 8 | 62945023 | -0.116 | 0.907425  | 0.77   | 0.441044 |
| rs35646721    | 8 | 65175053 | 0.099  | 0.921256  | 1.099  | 0.271793 |
| rs73238280    | 8 | 66126728 | 0.072  | 0.942684  | 1.052  | 0.292717 |

|            |   |           |        |          |        |          |
|------------|---|-----------|--------|----------|--------|----------|
| rs4636189  | 8 | 66949849  | -0.127 | 0.899249 | 0.909  | 0.363414 |
| rs6990907  | 8 | 68153857  | -0.28  | 0.779319 | 0.826  | 0.408876 |
| rs2380414  | 8 | 68442747  | -0.298 | 0.765524 | 0.768  | 0.442488 |
| rs6472404  | 8 | 69429259  | -0.602 | 0.547476 | 0.565  | 0.572277 |
| rs6987520  | 8 | 69831792  | -0.547 | 0.584146 | 0.519  | 0.60354  |
| rs2380607  | 8 | 70798409  | -0.355 | 0.7228   | 0.322  | 0.747613 |
| rs6472536  | 8 | 71405820  | -0.199 | 0.842585 | 0.309  | 0.757316 |
| rs1481792  | 8 | 72089631  | -0.057 | 0.954351 | 0.272  | 0.785477 |
| rs16938165 | 8 | 73242471  | 0.299  | 0.764777 | 0.418  | 0.676219 |
| rs718940   | 8 | 73975492  | 0.631  | 0.528032 | 0.545  | 0.585614 |
| rs6472810  | 8 | 74829717  | 0.648  | 0.516878 | 0.431  | 0.666556 |
| rs2922766  | 8 | 76565553  | 0.846  | 0.397674 | 0.513  | 0.608262 |
| rs1526662  | 8 | 77248410  | 0.889  | 0.374063 | 0.518  | 0.604798 |
| rs7006665  | 8 | 78387243  | 0.929  | 0.353118 | 0.552  | 0.580955 |
| rs73686967 | 8 | 79000069  | 0.939  | 0.347817 | 0.559  | 0.576405 |
| rs1870571  | 8 | 80234570  | 0.962  | 0.335823 | 0.517  | 0.605435 |
| rs272592   | 8 | 81469704  | 0.647  | 0.517754 | 0.257  | 0.796918 |
| rs7018273  | 8 | 82004857  | 0.375  | 0.707958 | -0.077 | 0.938305 |
| rs73277676 | 8 | 83110968  | 0.072  | 0.942418 | -0.284 | 0.776778 |
| rs7828796  | 8 | 84280532  | 0.051  | 0.959412 | -0.266 | 0.790423 |
| rs13255168 | 8 | 85792472  | 0.21   | 0.833832 | -0.485 | 0.627596 |
| rs13270013 | 8 | 86494538  | 0.213  | 0.831667 | -0.462 | 0.643791 |
| rs4526378  | 8 | 87934432  | 0.025  | 0.979957 | -0.492 | 0.622957 |
| rs11985946 | 8 | 88901809  | -0.076 | 0.939708 | -0.587 | 0.557255 |
| rs7822717  | 8 | 89661286  | -0.228 | 0.819886 | -0.758 | 0.448736 |
| rs2697668  | 8 | 90895010  | -0.357 | 0.721154 | -0.898 | 0.369004 |
| rs11784415 | 8 | 92227075  | -0.395 | 0.692961 | -0.949 | 0.342678 |
| rs7013413  | 8 | 92588984  | -0.407 | 0.683854 | -0.929 | 0.352979 |
| rs6991223  | 8 | 93789678  | -0.481 | 0.630665 | -0.687 | 0.49237  |
| rs279969   | 8 | 94061565  | -0.387 | 0.69885  | -0.558 | 0.57705  |
| rs73266247 | 8 | 95177716  | -0.172 | 0.863775 | -0.257 | 0.796871 |
| rs12543404 | 8 | 95689312  | -0.144 | 0.885542 | -0.16  | 0.873269 |
| rs3133745  | 8 | 96534806  | -0.065 | 0.948071 | 0.066  | 0.947629 |
| rs7838527  | 8 | 97025163  | -0.044 | 0.964833 | 0.112  | 0.911031 |
| rs7817620  | 8 | 98207621  | -0.257 | 0.797267 | 0.163  | 0.870878 |
| rs11996075 | 8 | 98910287  | -0.312 | 0.755407 | 0.167  | 0.867202 |
| rs4581019  | 8 | 100085850 | -0.322 | 0.747092 | 0.243  | 0.807647 |
| rs6468704  | 8 | 100994389 | -0.352 | 0.725197 | 0.296  | 0.766998 |
| rs7012550  | 8 | 101421536 | -0.356 | 0.721982 | 0.265  | 0.791119 |
| rs13272868 | 8 | 102670516 | -0.344 | 0.730685 | 0.289  | 0.772529 |
| rs16868855 | 8 | 102996980 | -0.368 | 0.713086 | 0.275  | 0.783395 |
| rs6468851  | 8 | 103974242 | 0.013  | 0.989654 | 0.265  | 0.791148 |
| rs7842508  | 8 | 105142985 | -0.017 | 0.986573 | 0.326  | 0.7441   |
| rs2669425  | 8 | 105395583 | -0.032 | 0.974342 | 0.308  | 0.757784 |
| rs302953   | 8 | 106512481 | -0.15  | 0.881014 | 0.215  | 0.829523 |
| rs6469040  | 8 | 107111290 | -0.196 | 0.844943 | 0.156  | 0.875873 |
| rs59508003 | 8 | 108841472 | 0.025  | 0.980002 | -0.119 | 0.905629 |
| rs12681212 | 8 | 109979163 | 0.124  | 0.901634 | -0.392 | 0.695234 |
| rs11987659 | 8 | 110442726 | 0.193  | 0.846672 | -0.492 | 0.622979 |
| rs7008113  | 8 | 111438655 | 0.198  | 0.842822 | -0.54  | 0.588975 |
| rs28548976 | 8 | 113146748 | 0.107  | 0.91475  | -0.743 | 0.457489 |
| rs6469450  | 8 | 114179599 | -0.16  | 0.87279  | -0.864 | 0.387561 |
| rs7010629  | 8 | 116299233 | -0.471 | 0.637814 | -1.076 | 0.282111 |

|            |   |           |        |            |        |          |
|------------|---|-----------|--------|------------|--------|----------|
| rs4876614  | 8 | 116821225 | -0.353 | 0.723719   | -1.004 | 0.315611 |
| rs10808483 | 8 | 117669202 | -0.357 | 0.720788   | -0.77  | 0.441338 |
| rs7000854  | 8 | 118319624 | -0.283 | 0.776989   | -0.836 | 0.402997 |
| rs7827972  | 8 | 119472218 | -0.107 | 0.914598   | -0.833 | 0.404828 |
| rs3103995  | 8 | 119872951 | -0.088 | 0.929576   | -0.934 | 0.350347 |
| rs28637899 | 8 | 120745371 | 0.13   | 0.896407   | -0.746 | 0.455522 |
| rs28378047 | 8 | 121764843 | 0.382  | 0.702283   | -0.443 | 0.657531 |
| rs1482186  | 8 | 122554521 | 0.405  | 0.685233   | -0.355 | 0.722457 |
| rs11780596 | 8 | 124023538 | 0.074  | 0.941402   | -0.345 | 0.730219 |
| rs67958403 | 8 | 124828616 | 0.12   | 0.904642   | -0.137 | 0.891254 |
| rs12542833 | 8 | 126077609 | -0.051 | 0.959195   | -0.205 | 0.837959 |
| rs12543473 | 8 | 127781440 | -0.649 | 0.51625    | -0.759 | 0.44759  |
| rs7840374  | 8 | 128911357 | -0.973 | 0.33047    | -0.782 | 0.433998 |
| rs11780763 | 8 | 129596286 | -1.147 | 0.251198   | -0.816 | 0.414246 |
| rs1897450  | 8 | 130354240 | -1.141 | 0.253885   | -0.721 | 0.470989 |
| rs4367565  | 8 | 131537955 | -1.181 | 0.237659   | -0.653 | 0.513695 |
| rs7845035  | 8 | 132753720 | -1.499 | 0.133958   | -0.939 | 0.347775 |
| rs7007063  | 8 | 134899419 | -1.139 | 0.254663   | -1.059 | 0.289727 |
| rs7831261  | 8 | 135346972 | -1.152 | 0.249272   | -1.055 | 0.291203 |
| rs2316700  | 8 | 136155114 | -1.158 | 0.246902   | -0.926 | 0.354571 |
| rs16905646 | 8 | 137342730 | -0.934 | 0.350213   | -0.749 | 0.453692 |
| rs13261938 | 8 | 138325276 | -0.77  | 0.44126    | -0.714 | 0.475233 |
| rs10094716 | 8 | 139505444 | -0.949 | 0.34268    | -0.866 | 0.386368 |
| rs885725   | 8 | 140670853 | -0.537 | 0.591502   | -0.396 | 0.692116 |
| rs2665947  | 8 | 140996982 | -0.559 | 0.575875   | -0.406 | 0.684856 |
| rs11780023 | 8 | 141992778 | -0.415 | 0.678074   | -0.597 | 0.550595 |
| rs28488065 | 8 | 142400454 | -0.439 | 0.660936   | -0.691 | 0.48932  |
| rs10088016 | 8 | 143414738 | -0.67  | 0.503143   | -1.045 | 0.295807 |
| rs9772258  | 8 | 144064337 | -1.028 | 0.304161   | -1.38  | 0.167673 |
| rs4875051  | 8 | 144860877 | -1.124 | 0.260981   | -1.444 | 0.148645 |
| rs28624193 | 8 | 146042362 | -1.105 | 0.269337   | -1.292 | 0.196504 |
| rs16932430 | 9 | 344332    | -2.818 | 0.00482693 | -0.517 | 0.605286 |
| rs10121104 | 9 | 1475395   | -2.406 | 0.016142   | -0.506 | 0.613192 |
| rs10964101 | 9 | 1943156   | -2.15  | 0.0315455  | -0.203 | 0.839467 |
| rs7865808  | 9 | 2913620   | -2.035 | 0.0418844  | -0.326 | 0.744138 |
| rs911491   | 9 | 4242464   | -1.848 | 0.0646185  | -0.728 | 0.466554 |
| rs172447   | 9 | 4859106   | -1.994 | 0.0461549  | -0.861 | 0.389406 |
| rs7043596  | 9 | 5709530   | -1.629 | 0.103264   | -0.478 | 0.632877 |
| rs2054315  | 9 | 6291242   | -1.466 | 0.142662   | -0.316 | 0.751927 |
| rs1926397  | 9 | 7457787   | -1.117 | 0.264182   | 0.388  | 0.698203 |
| rs10977204 | 9 | 8561542   | -0.887 | 0.375015   | 0.908  | 0.36389  |
| rs77455504 | 9 | 8821681   | -0.948 | 0.34313    | 0.954  | 0.339965 |
| rs12004295 | 9 | 9926519   | -1.44  | 0.149863   | 0.924  | 0.355387 |
| rs10738172 | 9 | 10634079  | -1.39  | 0.164497   | 1.017  | 0.308934 |
| rs7856943  | 9 | 11506162  | -1.346 | 0.178444   | 1.083  | 0.278781 |
| rs1590479  | 9 | 12658470  | -1.297 | 0.194685   | 1.36   | 0.173739 |
| rs10756461 | 9 | 13185149  | -1.549 | 0.1213     | 1.198  | 0.231061 |
| rs7863447  | 9 | 14155418  | -1.994 | 0.0460996  | 1.017  | 0.309094 |
| rs4741453  | 9 | 15085778  | -2.527 | 0.0115106  | 0.657  | 0.511193 |
| rs10962597 | 9 | 16794348  | -2.935 | 0.00333248 | 0.206  | 0.836446 |
| rs2248126  | 9 | 17502032  | -2.793 | 0.00521959 | 0.185  | 0.853447 |
| rs579392   | 9 | 18125966  | -2.73  | 0.00633728 | 0.111  | 0.911193 |
| rs10963807 | 9 | 18857089  | -2.522 | 0.0116743  | -0.019 | 0.984934 |

|             |   |          |        |           |       |           |
|-------------|---|----------|--------|-----------|-------|-----------|
| rs3949859   | 9 | 19793449 | -2.087 | 0.0368827 | -0.1  | 0.920086  |
| rs3764797   | 9 | 20363304 | -1.846 | 0.0649226 | 0.15  | 0.880689  |
| rs73442448  | 9 | 21925163 | -1.421 | 0.155319  | 0.433 | 0.665205  |
| rs4977826   | 9 | 23127562 | -1.101 | 0.270745  | 0.627 | 0.530438  |
| rs73471186  | 9 | 23425236 | -1.074 | 0.282703  | 0.623 | 0.53355   |
| rs6475797   | 9 | 24545513 | -1.089 | 0.276157  | 0.357 | 0.721373  |
| rs7873820   | 9 | 24883179 | -1.021 | 0.307387  | 0.288 | 0.773007  |
| rs6475867   | 9 | 25819316 | -0.534 | 0.593235  | 0.959 | 0.337637  |
| rs4475596   | 9 | 26571412 | -0.697 | 0.485811  | 0.771 | 0.440592  |
| rs4878586   | 9 | 27810414 | -0.718 | 0.472486  | 1.199 | 0.230573  |
| rs3915429   | 9 | 28771537 | -0.947 | 0.343786  | 1.276 | 0.202058  |
| rs1414028   | 9 | 29808173 | -0.964 | 0.335286  | 1.379 | 0.167741  |
| rs10969699  | 9 | 30486969 | -0.997 | 0.318807  | 1.441 | 0.149512  |
| rs2502177   | 9 | 31532933 | -0.937 | 0.348655  | 1.465 | 0.142819  |
| rs1329008   | 9 | 32695752 | -0.804 | 0.421492  | 1.495 | 0.13497   |
| rs10813967  | 9 | 33238344 | -0.789 | 0.429938  | 1.486 | 0.137196  |
| rs10972030  | 9 | 34266323 | -0.783 | 0.433753  | 1.713 | 0.0867991 |
| rs2381298   | 9 | 35123369 | -0.779 | 0.436107  | 1.756 | 0.0790778 |
| rs10814249  | 9 | 35529068 | -0.77  | 0.441319  | 1.778 | 0.0754676 |
| rs11998844  | 9 | 36745892 | -0.785 | 0.432222  | 1.886 | 0.0592726 |
| rs10814597  | 9 | 37685362 | -0.856 | 0.392239  | 2     | 0.0455116 |
| rs1856180   | 9 | 38534245 | -1.034 | 0.301269  | 1.991 | 0.046451  |
| rs117149427 | 9 | 39970473 | -1.07  | 0.28457   | 1.901 | 0.0573381 |
| rs118099850 | 9 | 44876048 | -1.317 | 0.187716  | 1.607 | 0.108102  |
| rs265083    | 9 | 71125832 | -1.352 | 0.176395  | 1.313 | 0.189196  |
| rs10869541  | 9 | 71541054 | -1.427 | 0.153695  | 1.175 | 0.239816  |
| rs11140844  | 9 | 72519703 | -1.225 | 0.220622  | 1.425 | 0.154266  |
| rs4436186   | 9 | 73133551 | -1.19  | 0.234066  | 1.454 | 0.145892  |
| rs1935338   | 9 | 74039166 | -1.329 | 0.183816  | 1.371 | 0.170422  |
| rs2147244   | 9 | 74637129 | -1.302 | 0.192987  | 1.395 | 0.163159  |
| rs11143547  | 9 | 75859487 | -1.348 | 0.177631  | 1.174 | 0.240569  |
| rs156771    | 9 | 76249152 | -1.374 | 0.169461  | 1.108 | 0.267862  |
| rs877809    | 9 | 77357968 | -1.396 | 0.162654  | 1.122 | 0.261838  |
| rs534937    | 9 | 78061301 | -1.348 | 0.177577  | 1.233 | 0.217484  |
| rs476612    | 9 | 79300111 | -1.469 | 0.141874  | 1.128 | 0.259139  |
| rs894823    | 9 | 80078529 | -1.342 | 0.179569  | 1.233 | 0.21753   |
| rs7855119   | 9 | 81011912 | -1.332 | 0.183022  | 1.535 | 0.124705  |
| rs1361537   | 9 | 81692440 | -1.278 | 0.201384  | 1.724 | 0.0847308 |
| rs61127598  | 9 | 82423894 | -1.201 | 0.229692  | 1.943 | 0.0520074 |
| rs10491946  | 9 | 82977316 | -1.143 | 0.252847  | 2.098 | 0.0358883 |
| rs7031973   | 9 | 83973725 | -0.843 | 0.399202  | 2.276 | 0.0228422 |
| rs7847908   | 9 | 85095497 | -0.589 | 0.55558   | 2.484 | 0.0130055 |
| rs7041467   | 9 | 85865570 | -0.537 | 0.590964  | 2.506 | 0.0122198 |
| rs7861108   | 9 | 86826872 | -0.441 | 0.659038  | 2.463 | 0.0137916 |
| rs2378671   | 9 | 87382724 | -0.341 | 0.733113  | 2.429 | 0.0151356 |
| rs11141018  | 9 | 88164213 | -0.221 | 0.825113  | 2.454 | 0.0141095 |
| rs12340913  | 9 | 89387312 | -0.24  | 0.810395  | 1.889 | 0.0588723 |
| rs2378759   | 9 | 90350505 | -0.001 | 0.999135  | 1.726 | 0.0842599 |
| rs7854707   | 9 | 91084877 | 0.047  | 0.962531  | 1.613 | 0.106847  |
| rs7037021   | 9 | 91660480 | 0.166  | 0.867937  | 1.653 | 0.0982713 |
| rs10820959  | 9 | 92909770 | 0.004  | 0.996787  | 1.618 | 0.105664  |
| rs1751798   | 9 | 93941796 | -0.043 | 0.965562  | 1.542 | 0.122979  |
| rs4744052   | 9 | 94227108 | -0.083 | 0.933605  | 1.511 | 0.130893  |



|            |    |           |        |           |        |           |
|------------|----|-----------|--------|-----------|--------|-----------|
| rs7869742  | 9  | 95256174  | 0.156  | 0.876402  | 1.566  | 0.11735   |
| rs7853614  | 9  | 96958130  | 0.529  | 0.596588  | 1.602  | 0.109143  |
| rs10993435 | 9  | 97744349  | 0.777  | 0.437245  | 1.634  | 0.102303  |
| rs7026894  | 9  | 98348271  | 0.969  | 0.332315  | 1.611  | 0.107136  |
| rs10978781 | 9  | 99508480  | 1.374  | 0.169391  | 1.71   | 0.0872444 |
| rs28470221 | 9  | 99789125  | 1.388  | 0.165212  | 1.718  | 0.0858493 |
| rs4742714  | 9  | 100851147 | 1.036  | 0.300301  | 1.591  | 0.111632  |
| rs4742762  | 9  | 101855570 | 0.576  | 0.564884  | 1.356  | 0.175219  |
| rs7870701  | 9  | 102897144 | 0.301  | 0.763133  | 1.088  | 0.276726  |
| rs6479037  | 9  | 103609873 | 0.1    | 0.920091  | 0.926  | 0.354385  |
| rs6479071  | 9  | 104683944 | -0.367 | 0.713746  | 0.381  | 0.703574  |
| rs1932158  | 9  | 105009468 | -0.561 | 0.57449   | 0.199  | 0.842562  |
| rs10820412 | 9  | 106058590 | -1.062 | 0.288202  | -0.323 | 0.746584  |
| rs10991231 | 9  | 107112483 | -1.268 | 0.20472   | -0.466 | 0.641006  |
| rs2777804  | 9  | 107571241 | -1.339 | 0.1806    | -0.532 | 0.594628  |
| rs73506383 | 9  | 108653654 | -1.028 | 0.30395   | -0.346 | 0.729217  |
| rs1510283  | 9  | 109695950 | -1.061 | 0.288773  | -0.269 | 0.788066  |
| rs10978931 | 9  | 110346728 | -1.076 | 0.282031  | -0.43  | 0.667144  |
| rs28412870 | 9  | 112078548 | -1.108 | 0.267922  | -0.699 | 0.484285  |
| rs3780528  | 9  | 113667277 | -0.93  | 0.352415  | -0.825 | 0.40942   |
| rs28655161 | 9  | 114831896 | -0.765 | 0.44413   | -0.866 | 0.386542  |
| rs786990   | 9  | 115416257 | -0.767 | 0.443079  | -0.853 | 0.393525  |
| rs784933   | 9  | 116436086 | -0.541 | 0.588769  | -0.45  | 0.652904  |
| rs902488   | 9  | 117106522 | -0.198 | 0.842772  | -0.256 | 0.797628  |
| rs3181350  | 9  | 117693694 | -0.08  | 0.936375  | -0.307 | 0.75872   |
| rs10739459 | 9  | 118869883 | -0.151 | 0.880249  | -0.485 | 0.627716  |
| rs4144636  | 9  | 119762707 | -0.094 | 0.924892  | -0.502 | 0.615445  |
| rs6478322  | 9  | 120490389 | -0.022 | 0.982832  | -0.31  | 0.756695  |
| rs4272457  | 9  | 121722369 | 0.12   | 0.904668  | -0.278 | 0.781341  |
| rs10760079 | 9  | 122902865 | 0.152  | 0.879066  | -0.43  | 0.667365  |
| rs17343890 | 9  | 123349699 | 0.12   | 0.904553  | -0.487 | 0.626279  |
| rs520198   | 9  | 124390320 | 0.034  | 0.973246  | -0.443 | 0.657611  |
| rs2535740  | 9  | 125555899 | -0.313 | 0.753998  | -0.469 | 0.638791  |
| rs700065   | 9  | 125833669 | -0.42  | 0.674532  | -0.485 | 0.628001  |
| rs10760335 | 9  | 126981215 | -0.602 | 0.5471    | -0.279 | 0.78023   |
| rs3814134  | 9  | 127267689 | -0.664 | 0.506417  | -0.24  | 0.810095  |
| rs829320   | 9  | 128433611 | -0.757 | 0.449261  | -0.242 | 0.808597  |
| rs6478756  | 9  | 129585521 | -1.201 | 0.229711  | -0.492 | 0.623056  |
| rs3780318  | 9  | 129979758 | -1.311 | 0.189907  | -0.491 | 0.623187  |
| rs2417073  | 9  | 130924239 | -1.404 | 0.160361  | -0.228 | 0.819449  |
| rs2293966  | 9  | 131591832 | -1.523 | 0.127883  | -0.301 | 0.763595  |
| rs590086   | 9  | 133343659 | -2.082 | 0.0373782 | -0.643 | 0.520034  |
| rs1009249  | 9  | 133914063 | -2.159 | 0.0308504 | -0.598 | 0.549835  |
| rs871461   | 9  | 135077361 | -2.201 | 0.0277043 | -0.592 | 0.553955  |
| rs739442   | 9  | 135770134 | -2.435 | 0.0148875 | -0.845 | 0.39805   |
| rs2789823  | 9  | 136769888 | -2.151 | 0.0315017 | -0.434 | 0.664431  |
| rs7027926  | 9  | 137925543 | -1.464 | 0.143138  | 0.27   | 0.787133  |
| rs2989740  | 9  | 138307768 | -1.699 | 0.0893688 | 0.109  | 0.913349  |
| rs7865308  | 9  | 140725113 | -1.923 | 0.0544901 | 0.036  | 0.971438  |
| rs9314655  | 9  | 141066491 | -1.923 | 0.0545404 | 0.064  | 0.949061  |
| rs943203   | 10 | 733392    | -0.962 | 0.336181  | -0.085 | 0.932159  |
| rs5013176  | 10 | 1412238   | -0.992 | 0.321439  | -0.138 | 0.890043  |
| rs10903741 | 10 | 2348123   | -0.416 | 0.677756  | 0.402  | 0.687391  |

|             |    |          |        |          |        |          |
|-------------|----|----------|--------|----------|--------|----------|
| rs4423101   | 10 | 3008619  | -0.575 | 0.565115 | 0.652  | 0.514693 |
| rs11252075  | 10 | 3806700  | -0.679 | 0.496841 | 0.455  | 0.649266 |
| rs10904207  | 10 | 4286897  | -0.848 | 0.39635  | 0.413  | 0.679248 |
| rs2105450   | 10 | 5115907  | -1.129 | 0.258886 | 0.214  | 0.83093  |
| rs4750190   | 10 | 6299773  | -1.204 | 0.228477 | 0.248  | 0.80415  |
| rs11259403  | 10 | 6572225  | -1.111 | 0.266376 | 0.283  | 0.777108 |
| rs4747574   | 10 | 7755623  | -0.981 | 0.326629 | 0.549  | 0.582676 |
| rs7100408   | 10 | 8508228  | -0.91  | 0.362945 | 0.421  | 0.673803 |
| rs10458815  | 10 | 9389644  | -1.032 | 0.301946 | 0.045  | 0.964482 |
| rs11256627  | 10 | 10535954 | -1.053 | 0.292532 | -0.227 | 0.820584 |
| rs201078    | 10 | 11002752 | -1.075 | 0.282323 | -0.359 | 0.719916 |
| rs10752241  | 10 | 11813176 | -1.24  | 0.215097 | -0.809 | 0.418679 |
| rs2399862   | 10 | 12744502 | -1.009 | 0.31303  | -0.934 | 0.350329 |
| rs4367850   | 10 | 13442447 | -0.551 | 0.581455 | -0.503 | 0.615182 |
| rs10796153  | 10 | 14136905 | -0.291 | 0.77136  | 0.024  | 0.980804 |
| rs2768713   | 10 | 14813860 | -0.171 | 0.864206 | 0.16   | 0.872549 |
| rs11253685  | 10 | 15943507 | 0.117  | 0.906654 | 0.094  | 0.924816 |
| rs1891473   | 10 | 16903080 | -0.014 | 0.988656 | -0.141 | 0.887878 |
| rs359307    | 10 | 17342489 | 0.068  | 0.945782 | -0.032 | 0.974634 |
| rs11013093  | 10 | 18518934 | 0.359  | 0.719287 | -0.171 | 0.86397  |
| rs17670074  | 10 | 19705383 | 0.93   | 0.352189 | -0.101 | 0.919408 |
| rs11011803  | 10 | 20394395 | 1.116  | 0.264626 | -0.013 | 0.989986 |
| rs78881625  | 10 | 21455373 | 1.259  | 0.208179 | -0.121 | 0.903335 |
| rs12248406  | 10 | 22319508 | 1.323  | 0.185674 | -0.14  | 0.888792 |
| rs12245749  | 10 | 22706897 | 1.334  | 0.182161 | -0.122 | 0.90254  |
| rs7096031   | 10 | 23939405 | 1.236  | 0.216417 | -0.221 | 0.825075 |
| rs3864844   | 10 | 24359354 | 1.196  | 0.231646 | -0.279 | 0.780157 |
| rs3808907   | 10 | 25242922 | 0.924  | 0.355582 | -0.599 | 0.548852 |
| rs495338    | 10 | 25620487 | 0.838  | 0.402071 | -0.546 | 0.584723 |
| rs2236418   | 10 | 26505496 | 0.737  | 0.461169 | -0.741 | 0.458881 |
| rs11015436  | 10 | 27259820 | 0.512  | 0.608443 | -0.779 | 0.435777 |
| rs1907373   | 10 | 27973632 | 0.516  | 0.606053 | -0.719 | 0.471982 |
| rs1775919   | 10 | 29173102 | 0.85   | 0.395145 | -0.202 | 0.839956 |
| rs4622160   | 10 | 29550249 | 0.919  | 0.358325 | -0.061 | 0.951594 |
| rs2505125   | 10 | 30516851 | 0.808  | 0.41918  | 0.037  | 0.970573 |
| rs7894459   | 10 | 31611256 | 0.823  | 0.41056  | 0.561  | 0.574486 |
| rs11009095  | 10 | 33103648 | 0.805  | 0.421107 | 0.691  | 0.489284 |
| rs224754    | 10 | 34233882 | 0.669  | 0.503682 | 0.746  | 0.455763 |
| rs773945    | 10 | 34817343 | 0.629  | 0.529235 | 0.768  | 0.442309 |
| rs637881    | 10 | 35894761 | 0.677  | 0.498369 | 0.835  | 0.40381  |
| rs7908422   | 10 | 37074863 | 0.618  | 0.536273 | 0.711  | 0.477342 |
| rs1200818   | 10 | 37559338 | 0.635  | 0.525659 | 0.715  | 0.474755 |
| rs2505192   | 10 | 38395023 | 0.703  | 0.482304 | 0.768  | 0.442411 |
| rs2501538   | 10 | 39076581 | 0.71   | 0.477698 | 0.778  | 0.436545 |
| rs210219    | 10 | 43052980 | 0.863  | 0.387982 | 0.84   | 0.400752 |
| rs2819023   | 10 | 43790965 | 0.953  | 0.340726 | 0.919  | 0.358093 |
| rs12359058  | 10 | 44471343 | 0.975  | 0.329476 | 0.924  | 0.355329 |
| rs4068564   | 10 | 45637078 | 1.01   | 0.312555 | 0.89   | 0.37337  |
| rs201949412 | 10 | 46739064 | 0.64   | 0.521894 | 0.637  | 0.523898 |
| rs11259769  | 10 | 47654624 | 0.47   | 0.638104 | 0.552  | 0.581074 |
| rs709616    | 10 | 48631327 | 0.23   | 0.817727 | 0.475  | 0.63495  |
| rs11101394  | 10 | 49805216 | -0.047 | 0.962251 | 0.548  | 0.584002 |
| rs3729496   | 10 | 50821191 | -0.428 | 0.668683 | 0.127  | 0.899081 |

|            |    |          |        |          |        |           |
|------------|----|----------|--------|----------|--------|-----------|
| rs2574951  | 10 | 52043987 | -0.586 | 0.557576 | -0.019 | 0.985027  |
| rs4935203  | 10 | 52690184 | -0.612 | 0.540537 | -0.033 | 0.97346   |
| rs10824131 | 10 | 53904888 | -0.518 | 0.604191 | 0.426  | 0.670338  |
| rs2951093  | 10 | 54290439 | -0.607 | 0.543799 | 0.502  | 0.615612  |
| rs406255   | 10 | 55308157 | -0.54  | 0.589364 | 0.748  | 0.454189  |
| rs7358217  | 10 | 55609769 | -0.519 | 0.603544 | 0.785  | 0.432452  |
| rs1733743  | 10 | 56847522 | -0.255 | 0.798362 | 1.085  | 0.277956  |
| rs3105343  | 10 | 58850567 | 0.246  | 0.805464 | 1.376  | 0.168937  |
| rs2184033  | 10 | 59823894 | 0.414  | 0.679174 | 1.5    | 0.133636  |
| rs57518909 | 10 | 60805002 | 0.537  | 0.591587 | 1.537  | 0.124216  |
| rs12357206 | 10 | 61790383 | 0.338  | 0.735641 | 1.407  | 0.159307  |
| rs4641412  | 10 | 62662645 | 0.364  | 0.715837 | 1.512  | 0.130415  |
| rs7098041  | 10 | 63775781 | 0.329  | 0.742439 | 1.491  | 0.136056  |
| rs10995124 | 10 | 64094166 | 0.324  | 0.746299 | 1.493  | 0.135371  |
| rs10822165 | 10 | 65146959 | 0.311  | 0.755536 | 1.586  | 0.112853  |
| rs16920386 | 10 | 66551141 | 0.316  | 0.752142 | 1.683  | 0.092313  |
| rs7922131  | 10 | 67592521 | 0.36   | 0.718487 | 1.768  | 0.0770612 |
| rs12256826 | 10 | 67974590 | 0.394  | 0.693785 | 1.88   | 0.0601366 |
| rs1904611  | 10 | 69023307 | 0.273  | 0.785025 | 2.006  | 0.0448749 |
| rs1467568  | 10 | 69675158 | 0.358  | 0.720282 | 2.127  | 0.0334358 |
| rs10823301 | 10 | 70885875 | 0.428  | 0.668396 | 2.103  | 0.0354988 |
| rs2271698  | 10 | 71868763 | 0.703  | 0.481817 | 1.728  | 0.0840713 |
| rs756322   | 10 | 72744630 | 1.069  | 0.284892 | 1.458  | 0.144806  |
| rs12257956 | 10 | 73875142 | 1.377  | 0.168392 | 1.08   | 0.280319  |
| rs7901016  | 10 | 74637326 | 1.342  | 0.179443 | 1.104  | 0.269538  |
| rs12644    | 10 | 75197051 | 1.259  | 0.208062 | 1.095  | 0.273555  |
| rs17676126 | 10 | 75905198 | 1.192  | 0.23313  | 1.129  | 0.258923  |
| rs1551067  | 10 | 76787128 | 1.048  | 0.294654 | 1.236  | 0.216409  |
| rs7896396  | 10 | 77514775 | 0.76   | 0.447219 | 1.225  | 0.220518  |
| rs7071465  | 10 | 78095699 | 0.472  | 0.636731 | 1.224  | 0.220829  |
| rs6480855  | 10 | 79026227 | 0.227  | 0.820157 | 1.369  | 0.170856  |
| rs3758464  | 10 | 79785825 | 0.241  | 0.809364 | 1.6    | 0.10962   |
| rs16936901 | 10 | 80898075 | 0.158  | 0.874585 | 1.812  | 0.0700183 |
| rs4342971  | 10 | 81664796 | -0.062 | 0.950591 | 1.827  | 0.0677378 |
| rs10882097 | 10 | 82568684 | -0.179 | 0.85785  | 1.781  | 0.074849  |
| rs761736   | 10 | 83632203 | -0.175 | 0.860801 | 1.842  | 0.0654432 |
| rs7069367  | 10 | 84074976 | -0.014 | 0.989071 | 1.82   | 0.0687043 |
| rs4600152  | 10 | 85221278 | 0.058  | 0.953383 | 1.717  | 0.08594   |
| rs2350152  | 10 | 85788059 | 0      | 0.999889 | 1.226  | 0.220199  |
| rs7910550  | 10 | 86633900 | 0.043  | 0.9657   | 1.217  | 0.22373   |
| rs11201538 | 10 | 87052611 | 0.036  | 0.97094  | 1.146  | 0.251954  |
| rs2607825  | 10 | 88012288 | 0.017  | 0.986423 | 0.946  | 0.34428   |
| rs10887651 | 10 | 88470047 | 0.008  | 0.993672 | 0.922  | 0.356431  |
| rs10788551 | 10 | 89319138 | -0.011 | 0.99099  | 0.863  | 0.387899  |
| rs1169043  | 10 | 90231562 | 0.003  | 0.997242 | 0.691  | 0.48948   |
| rs17121936 | 10 | 91218305 | -0.015 | 0.987969 | 0.411  | 0.681291  |
| rs3980838  | 10 | 92944658 | -0.064 | 0.948958 | 0.014  | 0.988708  |
| rs6583810  | 10 | 94116233 | -0.075 | 0.939917 | -0.075 | 0.940105  |
| rs788086   | 10 | 95178246 | -0.054 | 0.956604 | -0.263 | 0.792687  |
| rs7099034  | 10 | 95545378 | -0.147 | 0.882882 | -0.254 | 0.79924   |
| rs4494250  | 10 | 96563757 | -0.14  | 0.888632 | -0.098 | 0.92209   |
| rs12768725 | 10 | 97341184 | -0.125 | 0.900772 | -0.009 | 0.992876  |
| rs60731885 | 10 | 99395652 | -0.305 | 0.760364 | 0.271  | 0.786394  |

|              |    |           |        |            |        |           |
|--------------|----|-----------|--------|------------|--------|-----------|
| rs4919199    | 10 | 100044136 | -0.486 | 0.626876   | 0.25   | 0.802903  |
| rs2862553    | 10 | 101048492 | -0.492 | 0.622687   | 0.365  | 0.71494   |
| rs12806      | 10 | 101911142 | -0.491 | 0.623566   | 0.387  | 0.698615  |
| rs11190730   | 10 | 102621414 | -0.345 | 0.73012    | 0.472  | 0.636654  |
| rs60082283   | 10 | 103747505 | -0.118 | 0.906236   | 0.538  | 0.590772  |
| rs4919641    | 10 | 104217503 | -0.064 | 0.948867   | 0.559  | 0.576083  |
| rs11191752   | 10 | 105393542 | -0.03  | 0.976364   | 0.48   | 0.631055  |
| Affx-2423140 | 10 | 105927110 | -0.022 | 0.982752   | 0.385  | 0.700389  |
| rs10884071   | 10 | 106731970 | 0.066  | 0.947337   | 0.317  | 0.751137  |
| rs6584730    | 10 | 107973384 | 0.289  | 0.772504   | 0.245  | 0.806538  |
| rs7919051    | 10 | 108754043 | 0.145  | 0.884613   | 0.226  | 0.821515  |
| rs7098945    | 10 | 110837359 | -0.058 | 0.953636   | 0.321  | 0.748097  |
| rs56300906   | 10 | 111909272 | -0.485 | 0.627783   | 0.017  | 0.986806  |
| rs11195536   | 10 | 113111778 | -0.72  | 0.471559   | -0.222 | 0.824289  |
| rs7908735    | 10 | 113972406 | -0.77  | 0.441219   | -0.379 | 0.704939  |
| rs1056877    | 10 | 114925758 | -1.018 | 0.308628   | -0.854 | 0.392856  |
| rs3813722    | 10 | 116073696 | -1.044 | 0.296655   | -1.165 | 0.243994  |
| rs808403     | 10 | 116794370 | -0.86  | 0.389994   | -0.819 | 0.412516  |
| rs7904803    | 10 | 117649124 | -0.771 | 0.440527   | -0.533 | 0.594141  |
| rs4751585    | 10 | 118163404 | -0.965 | 0.334407   | -0.338 | 0.735111  |
| rs10787762   | 10 | 118916215 | -0.851 | 0.394549   | -0.056 | 0.955281  |
| rs1419138    | 10 | 119731281 | -1.187 | 0.235169   | 0.154  | 0.877974  |
| rs7904946    | 10 | 120727619 | -1.396 | 0.162713   | 0.059  | 0.952987  |
| rs12569630   | 10 | 121362660 | -1.498 | 0.134193   | -0.002 | 0.99853   |
| rs4752418    | 10 | 122172208 | -1.519 | 0.128828   | -0.049 | 0.961064  |
| rs10886954   | 10 | 123369542 | -1.754 | 0.0794851  | -0.144 | 0.885517  |
| rs7911168    | 10 | 126030949 | -1.784 | 0.0743522  | 0.081  | 0.935394  |
| rs12768691   | 10 | 127197908 | -1.875 | 0.0607818  | -0.04  | 0.967711  |
| rs2930121    | 10 | 127874740 | -1.918 | 0.0550603  | -0.205 | 0.837868  |
| rs2489390    | 10 | 128949289 | -1.989 | 0.0467526  | -0.238 | 0.812091  |
| rs61484573   | 10 | 129712083 | -1.861 | 0.0627545  | -0.072 | 0.942961  |
| rs10741164   | 10 | 130541770 | -2.014 | 0.04403    | -0.261 | 0.793981  |
| rs2160789    | 10 | 131197645 | -2.579 | 0.00991613 | -0.76  | 0.447335  |
| rs1009001    | 10 | 132225583 | -2.844 | 0.00445366 | -0.959 | 0.337366  |
| rs3892707    | 10 | 132583686 | -2.92  | 0.00349977 | -0.971 | 0.331339  |
| rs4394761    | 10 | 133514014 | -2.764 | 0.00571624 | -0.493 | 0.622052  |
| rs56343556   | 11 | 1405829   | -2.185 | 0.0289029  | -2.119 | 0.0340508 |
| rs598960     | 11 | 1871246   | -2.104 | 0.0353591  | -2.09  | 0.0366367 |
| rs58762055   | 11 | 2738947   | -1.679 | 0.0931725  | -1.904 | 0.0569406 |
| rs10834647   | 11 | 3645313   | -1.004 | 0.315418   | -1.291 | 0.196581  |
| rs331537     | 11 | 4471276   | -0.547 | 0.584091   | -0.886 | 0.375623  |
| rs10768634   | 11 | 5193410   | -0.212 | 0.831916   | -0.565 | 0.572321  |
| rs58905541   | 11 | 6317387   | 0.203  | 0.839447   | -0.152 | 0.879364  |
| rs11040924   | 11 | 6590995   | 0.411  | 0.680812   | -0.029 | 0.976923  |
| rs7110779    | 11 | 7657821   | 0.498  | 0.618604   | -0.204 | 0.83842   |
| rs4758042    | 11 | 8129296   | 0.542  | 0.587686   | -0.173 | 0.86299   |
| rs2742554    | 11 | 9105726   | 0.463  | 0.643608   | -0.384 | 0.701306  |
| rs6483580    | 11 | 9652917   | 0.462  | 0.64441    | -0.38  | 0.704091  |
| rs2132517    | 11 | 10791983  | 0.502  | 0.615845   | -0.322 | 0.747819  |
| rs10831594   | 11 | 11367614  | 0.371  | 0.710958   | -0.355 | 0.722576  |
| rs10741584   | 11 | 12383869  | 0.103  | 0.917799   | -0.466 | 0.641523  |
| rs4300377    | 11 | 12733290  | 0.115  | 0.908258   | -0.466 | 0.641385  |
| rs11023017   | 11 | 13943725  | 0.276  | 0.782265   | -0.383 | 0.701491  |

|            |    |          |        |           |        |           |
|------------|----|----------|--------|-----------|--------|-----------|
| rs903809   | 11 | 14974477 | 0.355  | 0.722729  | -0.336 | 0.736929  |
| rs6486270  | 11 | 15970939 | 0.804  | 0.421669  | -0.161 | 0.871808  |
| rs35944766 | 11 | 16456243 | 0.928  | 0.353148  | -0.108 | 0.914013  |
| rs4148636  | 11 | 17427363 | 1.18   | 0.238066  | -0.239 | 0.811123  |
| rs80345538 | 11 | 17853542 | 1.244  | 0.213661  | -0.203 | 0.839436  |
| rs905552   | 11 | 19096159 | 1.17   | 0.242182  | -0.361 | 0.718211  |
| rs11025189 | 11 | 19620227 | 0.789  | 0.430042  | -0.671 | 0.501993  |
| rs1429780  | 11 | 20860374 | 0.079  | 0.936682  | -1.555 | 0.11993   |
| rs4378393  | 11 | 21604291 | -0.279 | 0.780597  | -1.844 | 0.0651385 |
| rs7930983  | 11 | 22163514 | -0.438 | 0.661266  | -1.892 | 0.0584715 |
| rs12362483 | 11 | 23038339 | -0.471 | 0.637759  | -1.745 | 0.0810277 |
| rs7935935  | 11 | 24252332 | -0.601 | 0.548103  | -1.63  | 0.103007  |
| rs2084158  | 11 | 25161365 | -0.769 | 0.441664  | -1.645 | 0.099874  |
| rs1561937  | 11 | 25585180 | -0.823 | 0.410539  | -1.664 | 0.0961709 |
| rs12807847 | 11 | 26742676 | -0.913 | 0.361458  | -1.651 | 0.0987573 |
| rs1036863  | 11 | 27221070 | -1.004 | 0.31561   | -1.674 | 0.0941965 |
| rs10835296 | 11 | 28269884 | -1.093 | 0.274446  | -1.698 | 0.0895284 |
| rs697311   | 11 | 29675343 | -1.146 | 0.251838  | -1.695 | 0.0900483 |
| rs598264   | 11 | 30794725 | -1.383 | 0.166642  | -1.704 | 0.0884134 |
| rs1806153  | 11 | 31850105 | -1.656 | 0.0977059 | -1.742 | 0.0814886 |
| rs9300013  | 11 | 32504542 | -1.699 | 0.0893477 | -1.675 | 0.0939916 |
| rs10437629 | 11 | 33588210 | -1.634 | 0.10229   | -1.538 | 0.124128  |
| rs10836265 | 11 | 34637669 | -1.631 | 0.102929  | -1.354 | 0.1756    |
| rs2553780  | 11 | 35076479 | -1.589 | 0.112058  | -1.273 | 0.202924  |
| rs617623   | 11 | 35900868 | -1.686 | 0.0917791 | -1.463 | 0.143397  |
| rs7942019  | 11 | 36898712 | -1.777 | 0.0755398 | -1.545 | 0.122297  |
| rs1461350  | 11 | 37153829 | -1.673 | 0.0942862 | -1.499 | 0.133776  |
| rs7930108  | 11 | 38303358 | -1.549 | 0.121402  | -1.491 | 0.136028  |
| rs7109552  | 11 | 39715164 | -1.469 | 0.141822  | -1.394 | 0.163188  |
| rs11036391 | 11 | 41431255 | -1.46  | 0.144246  | -1.344 | 0.178805  |
| rs7480010  | 11 | 42246718 | -1.464 | 0.143245  | -1.377 | 0.168606  |
| rs4466816  | 11 | 42766485 | -1.587 | 0.112449  | -1.52  | 0.128626  |
| rs2434465  | 11 | 43955783 | -1.747 | 0.0806223 | -1.68  | 0.0930357 |
| rs4755957  | 11 | 45101538 | -1.561 | 0.118579  | -1.675 | 0.093934  |
| rs2035067  | 11 | 46963196 | -1.343 | 0.179125  | -1.652 | 0.0984544 |
| rs11601310 | 11 | 48085189 | -1.224 | 0.220799  | -1.606 | 0.108344  |
| rs1945189  | 11 | 48418889 | -1.262 | 0.207125  | -1.591 | 0.111617  |
| rs61885308 | 11 | 49343363 | -1.621 | 0.105116  | -1.602 | 0.109218  |
| rs11493324 | 11 | 50011304 | -1.649 | 0.0990812 | -1.61  | 0.107486  |
| rs11246414 | 11 | 51213837 | -1.703 | 0.0886283 | -1.549 | 0.121365  |
| rs4881827  | 11 | 51492229 | -1.711 | 0.0870801 | -1.542 | 0.123107  |
| rs1216249  | 11 | 55172493 | -1.816 | 0.0694311 | -1.506 | 0.132152  |
| rs642630   | 11 | 56292983 | -1.823 | 0.0683589 | -1.499 | 0.133811  |
| rs571651   | 11 | 57148053 | -1.904 | 0.0569634 | -1.499 | 0.133962  |
| rs2510868  | 11 | 58247718 | -1.939 | 0.0524462 | -1.459 | 0.144646  |
| rs693960   | 11 | 58941450 | -1.987 | 0.0469261 | -1.362 | 0.173046  |
| rs7124974  | 11 | 59906972 | -1.947 | 0.0515146 | -1.243 | 0.213862  |
| rs757080   | 11 | 60842234 | -1.634 | 0.102224  | -0.972 | 0.330902  |
| rs3017599  | 11 | 61316307 | -1.878 | 0.0604199 | -1.061 | 0.288912  |
| rs653309   | 11 | 62254093 | -2.257 | 0.0240078 | -1.466 | 0.142643  |
| rs11231300 | 11 | 62771582 | -2.298 | 0.0215369 | -1.487 | 0.137028  |
| rs9666077  | 11 | 63817027 | -2.278 | 0.0227273 | -1.35  | 0.177059  |
| rs523200   | 11 | 64532579 | -2.25  | 0.0244638 | -1.119 | 0.263077  |

|            |    |           |        |           |        |          |
|------------|----|-----------|--------|-----------|--------|----------|
| rs666194   | 11 | 65159382  | -2.286 | 0.0222632 | -1.112 | 0.266162 |
| rs3016311  | 11 | 66091814  | -2.211 | 0.0270185 | -1.084 | 0.278215 |
| rs10896167 | 11 | 67065889  | -2.166 | 0.0303253 | -1.061 | 0.288516 |
| rs17149022 | 11 | 68138835  | -1.967 | 0.0492008 | -0.874 | 0.38215  |
| rs600523   | 11 | 69360812  | -1.573 | 0.115798  | -0.535 | 0.592918 |
| rs2096818  | 11 | 70374786  | -1.372 | 0.169948  | -0.486 | 0.626812 |
| rs10793379 | 11 | 70731148  | -1.547 | 0.121875  | -0.67  | 0.502791 |
| rs1791544  | 11 | 71784957  | -1.211 | 0.226073  | -0.371 | 0.710843 |
| rs1726759  | 11 | 73735224  | -0.773 | 0.439384  | -0.17  | 0.864897 |
| rs2712780  | 11 | 74829787  | -0.805 | 0.420774  | -0.34  | 0.733881 |
| rs623136   | 11 | 75272411  | -0.833 | 0.404817  | -0.374 | 0.708475 |
| rs7940340  | 11 | 76334817  | -0.894 | 0.371447  | -0.482 | 0.629908 |
| rs2602482  | 11 | 77013928  | -0.713 | 0.475612  | -0.267 | 0.789801 |
| rs11237451 | 11 | 78025459  | -0.625 | 0.531855  | -0.166 | 0.86829  |
| rs7115431  | 11 | 78342104  | -0.624 | 0.532737  | -0.152 | 0.879317 |
| rs11828270 | 11 | 79323909  | -0.825 | 0.409236  | -0.028 | 0.977501 |
| rs7950486  | 11 | 80547481  | -1.182 | 0.237106  | -0.145 | 0.884995 |
| rs12286515 | 11 | 80887010  | -1.161 | 0.245713  | -0.085 | 0.932574 |
| rs10792613 | 11 | 82094199  | -1.07  | 0.284649  | 0.034  | 0.972481 |
| rs7935724  | 11 | 83149567  | -0.944 | 0.345178  | 0.136  | 0.891925 |
| rs568789   | 11 | 84146142  | -0.838 | 0.401928  | 0.242  | 0.808664 |
| rs11234135 | 11 | 84412257  | -0.846 | 0.3977    | 0.199  | 0.841981 |
| rs3851177  | 11 | 85436303  | -0.837 | 0.402825  | 0.149  | 0.881417 |
| rs10792837 | 11 | 85905715  | -0.833 | 0.405047  | 0.142  | 0.886824 |
| rs186198   | 11 | 86911919  | -0.533 | 0.593977  | 0.258  | 0.796426 |
| rs905646   | 11 | 88353802  | -0.288 | 0.773521  | 0.296  | 0.767273 |
| rs11018632 | 11 | 89231284  | -0.242 | 0.80886   | 0.216  | 0.829327 |
| rs12273274 | 11 | 91272582  | -0.106 | 0.915692  | 0.19   | 0.849069 |
| rs1390779  | 11 | 91873636  | -0.118 | 0.905982  | 0.145  | 0.884983 |
| rs3847554  | 11 | 92668826  | -0.241 | 0.809567  | 0.05   | 0.960318 |
| rs2511407  | 11 | 93801891  | -0.379 | 0.704934  | -0.111 | 0.911512 |
| rs10741495 | 11 | 94447525  | -0.332 | 0.740192  | -0.099 | 0.921531 |
| rs547219   | 11 | 95573491  | -0.72  | 0.471567  | -0.696 | 0.486336 |
| rs7125582  | 11 | 96548221  | -0.589 | 0.555896  | -0.645 | 0.519231 |
| rs7482826  | 11 | 97233154  | -0.6   | 0.548421  | -0.611 | 0.540894 |
| rs578331   | 11 | 97894832  | -0.617 | 0.537491  | -0.594 | 0.552295 |
| rs7947441  | 11 | 98824624  | -0.565 | 0.571919  | -0.309 | 0.757697 |
| rs2726355  | 11 | 99455061  | -0.636 | 0.524679  | -0.308 | 0.757885 |
| rs1442449  | 11 | 100165790 | -0.649 | 0.516255  | -0.372 | 0.709875 |
| rs4754743  | 11 | 101114519 | -0.503 | 0.61522   | -0.38  | 0.704123 |
| rs548336   | 11 | 102259947 | -0.407 | 0.683868  | -0.441 | 0.659261 |
| rs7937339  | 11 | 103275628 | -0.221 | 0.824976  | -0.332 | 0.740131 |
| rs1384702  | 11 | 103576927 | -0.174 | 0.862079  | -0.329 | 0.742413 |
| rs6591090  | 11 | 104532836 | -0.262 | 0.793375  | -0.507 | 0.611842 |
| rs17104003 | 11 | 105092244 | -0.309 | 0.75746   | -0.554 | 0.579651 |
| rs527709   | 11 | 106251514 | -0.459 | 0.64603   | -0.71  | 0.477457 |
| rs7102449  | 11 | 106941922 | -0.501 | 0.616081  | -0.627 | 0.530565 |
| rs550514   | 11 | 107528355 | -0.489 | 0.625111  | -0.619 | 0.535688 |
| rs2640758  | 11 | 108429200 | -0.461 | 0.644687  | -0.559 | 0.576049 |
| rs566552   | 11 | 109220879 | -0.401 | 0.688257  | -0.523 | 0.601144 |
| rs546359   | 11 | 109697903 | -0.5   | 0.617076  | -0.602 | 0.546918 |
| rs4622301  | 11 | 110796085 | -0.495 | 0.620606  | -0.402 | 0.687583 |
| rs7130573  | 11 | 111115013 | -0.483 | 0.629241  | -0.389 | 0.697465 |

|            |    |           |        |           |        |           |
|------------|----|-----------|--------|-----------|--------|-----------|
| rs56113707 | 11 | 112235975 | -0.425 | 0.670844  | -0.401 | 0.688356  |
| rs76172591 | 11 | 113279119 | -0.252 | 0.80116   | -0.488 | 0.625885  |
| rs7934726  | 11 | 113910276 | -0.171 | 0.864096  | -0.525 | 0.599575  |
| rs2513671  | 11 | 114928683 | -0.321 | 0.748401  | -0.519 | 0.603563  |
| rs1616116  | 11 | 115544971 | -0.369 | 0.712159  | -0.46  | 0.645742  |
| rs1508102  | 11 | 116379889 | -0.719 | 0.472     | -0.321 | 0.748433  |
| rs12808524 | 11 | 116890993 | -1.061 | 0.288905  | -0.357 | 0.721298  |
| rs647975   | 11 | 118038741 | -1.781 | 0.074905  | -0.33  | 0.741509  |
| rs1941406  | 11 | 120141165 | -2.135 | 0.0327357 | -0.18  | 0.857217  |
| rs11601979 | 11 | 120476990 | -2.187 | 0.0287575 | -0.148 | 0.882162  |
| rs60912271 | 11 | 121519662 | -2.255 | 0.0241576 | -0.135 | 0.892899  |
| rs12287912 | 11 | 122675193 | -2.114 | 0.0344815 | 0.123  | 0.902085  |
| rs7927064  | 11 | 123261385 | -1.999 | 0.0455951 | 0.221  | 0.824758  |
| rs7939740  | 11 | 124466082 | -1.833 | 0.0668667 | 0.42   | 0.674515  |
| rs59826922 | 11 | 126421415 | -1.475 | 0.140314  | 0.494  | 0.621065  |
| rs1471446  | 11 | 127274109 | -1.045 | 0.296142  | 0.65   | 0.515646  |
| rs11221396 | 11 | 128491023 | -0.966 | 0.334192  | 0.768  | 0.442702  |
| rs10894116 | 11 | 129567710 | -0.294 | 0.768669  | 1.452  | 0.146588  |
| rs7103088  | 11 | 130009306 | -0.211 | 0.832905  | 1.582  | 0.113621  |
| rs1946024  | 11 | 131085448 | -0.722 | 0.470371  | 1.461  | 0.144104  |
| rs103610   | 11 | 131413419 | -0.996 | 0.319144  | 1.384  | 0.166308  |
| rs7119808  | 11 | 132584949 | -0.984 | 0.32517   | 1.481  | 0.138521  |
| rs6590705  | 11 | 133334522 | -1.158 | 0.246823  | 1.107  | 0.268268  |
| rs61454082 | 11 | 133934517 | -1.324 | 0.185513  | 0.696  | 0.48653   |
| rs7119365  | 11 | 134660704 | -1.286 | 0.198372  | 0.814  | 0.415447  |
| rs7967165  | 12 | 1080007   | -1.126 | 0.260144  | -0.66  | 0.50927   |
| rs10848615 | 12 | 2219095   | -1.118 | 0.263459  | -0.606 | 0.544244  |
| rs11062436 | 12 | 3076775   | -1.136 | 0.255862  | -0.606 | 0.544423  |
| rs7311123  | 12 | 3563489   | -1.286 | 0.198316  | -0.867 | 0.3857    |
| rs4238011  | 12 | 4359689   | -1.637 | 0.101538  | -1.28  | 0.200715  |
| rs2159602  | 12 | 5385379   | -1.594 | 0.110861  | -1.541 | 0.123386  |
| rs7955398  | 12 | 6357060   | -1.569 | 0.116683  | -1.615 | 0.106297  |
| rs10444429 | 12 | 7552613   | -1.909 | 0.0562592 | -1.358 | 0.174307  |
| rs6486847  | 12 | 8309235   | -2.245 | 0.0247699 | -1.573 | 0.115787  |
| rs11047443 | 12 | 8976780   | -2.33  | 0.0198142 | -1.607 | 0.108076  |
| rs2058429  | 12 | 9747466   | -2.326 | 0.0200404 | -1.635 | 0.102138  |
| rs7962426  | 12 | 10415847  | -2.334 | 0.0195753 | -1.616 | 0.106095  |
| rs60786329 | 12 | 11553039  | -2.19  | 0.0285388 | -1.63  | 0.10309   |
| rs2111049  | 12 | 11827629  | -2.089 | 0.0366671 | -1.621 | 0.105046  |
| rs1640874  | 12 | 13065709  | -1.708 | 0.0877122 | -1.704 | 0.0883067 |
| rs11055450 | 12 | 13603787  | -1.667 | 0.0954639 | -1.827 | 0.0676787 |
| rs7310891  | 12 | 14816563  | -1.422 | 0.155105  | -1.519 | 0.128777  |
| rs10744093 | 12 | 15760182  | -1.339 | 0.180455  | -1.416 | 0.156702  |
| rs73322855 | 12 | 16750601  | -1.44  | 0.149823  | -1.736 | 0.082596  |
| rs10846448 | 12 | 17028884  | -1.431 | 0.152306  | -1.761 | 0.0782281 |
| rs74069191 | 12 | 18162654  | -1.395 | 0.162882  | -1.857 | 0.0633039 |
| rs11044358 | 12 | 19075979  | -1.369 | 0.171078  | -1.938 | 0.0526549 |
| rs10770476 | 12 | 19493103  | -1.385 | 0.166079  | -1.948 | 0.0514411 |
| rs10841722 | 12 | 21166091  | -1.521 | 0.128173  | -1.959 | 0.0500879 |
| rs10743430 | 12 | 22151573  | -1.796 | 0.0724853 | -2.094 | 0.0362712 |
| rs1919975  | 12 | 23255104  | -1.774 | 0.0760345 | -2.085 | 0.0370337 |
| rs2197409  | 12 | 23607626  | -1.788 | 0.0738094 | -2.026 | 0.0427663 |
| rs6487400  | 12 | 24727926  | -2.187 | 0.0287312 | -1.838 | 0.0659994 |

|              |    |          |        |             |        |             |
|--------------|----|----------|--------|-------------|--------|-------------|
| rs7303282    | 12 | 25432626 | -2.375 | 0.0175536   | -1.875 | 0.0607683   |
| rs6487543    | 12 | 26438189 | -2.702 | 0.00689143  | -2.103 | 0.0354256   |
| rs10842753   | 12 | 26697411 | -2.739 | 0.00616754  | -2.134 | 0.0328149   |
| rs4244857    | 12 | 27940158 | -2.893 | 0.00381937  | -2.239 | 0.0251317   |
| rs405394     | 12 | 28240440 | -2.962 | 0.003056    | -2.286 | 0.0222379   |
| rs4931170    | 12 | 29388772 | -2.905 | 0.00367531  | -2.134 | 0.0328321   |
| Affx-7624294 | 12 | 29706904 | -2.991 | 0.00278265  | -2.19  | 0.0284916   |
| rs12303020   | 12 | 30644401 | -3.247 | 0.00116655  | -2.56  | 0.010458    |
| rs7313475    | 12 | 31794196 | -3.381 | 0.000723335 | -2.789 | 0.00528897  |
| rs10844341   | 12 | 32912313 | -3.457 | 0.000546813 | -2.835 | 0.00458143  |
| rs10772057   | 12 | 33416922 | -3.499 | 0.000466656 | -2.863 | 0.00420202  |
| rs1486341    | 12 | 39042063 | -3.682 | 0.000231304 | -2.838 | 0.00453552  |
| rs12298504   | 12 | 39599937 | -3.702 | 0.000214188 | -2.836 | 0.00456578  |
| rs1540698    | 12 | 40350436 | -3.702 | 0.000213614 | -2.827 | 0.0046978   |
| rs280371     | 12 | 41508644 | -3.721 | 0.000198733 | -2.814 | 0.00489692  |
| rs12372521   | 12 | 42242615 | -3.753 | 0.00017471  | -2.841 | 0.00449985  |
| rs1356972    | 12 | 43326535 | -3.731 | 0.000190951 | -2.741 | 0.00611684  |
| rs2638855    | 12 | 44497579 | -3.621 | 0.000293285 | -2.614 | 0.00893969  |
| Affx-7999246 | 12 | 44899212 | -3.606 | 0.000310519 | -2.575 | 0.0100362   |
| rs4768652    | 12 | 46031230 | -3.52  | 0.000431824 | -2.412 | 0.0158683   |
| rs2430940    | 12 | 46944794 | -3.501 | 0.000462734 | -2.348 | 0.0188824   |
| rs7137808    | 12 | 47323390 | -3.504 | 0.00045789  | -2.345 | 0.0190508   |
| rs7970314    | 12 | 48308174 | -3.346 | 0.000818408 | -2.349 | 0.0188435   |
| rs1274726    | 12 | 49501398 | -3.195 | 0.0013996   | -2.133 | 0.0329533   |
| rs2849266    | 12 | 50366300 | -3.223 | 0.00126714  | -2.04  | 0.0413249   |
| rs7310094    | 12 | 50775413 | -3.163 | 0.00156416  | -2.03  | 0.0423195   |
| rs7966619    | 12 | 52532208 | -3.014 | 0.00257427  | -2.306 | 0.0210872   |
| rs7306523    | 12 | 53393964 | -3.272 | 0.00106826  | -2.741 | 0.00612681  |
| rs784894     | 12 | 53817956 | -3.177 | 0.00148581  | -2.889 | 0.00387004  |
| rs7294656    | 12 | 54771685 | -3.148 | 0.00164304  | -2.983 | 0.00285018  |
| rs11171511   | 12 | 55894216 | -3.009 | 0.00262268  | -3.173 | 0.00150914  |
| Affx-8214778 | 12 | 56605220 | -3.212 | 0.00131957  | -3.405 | 0.000662492 |
| rs776037     | 12 | 57843014 | -3.14  | 0.00168692  | -3.497 | 0.000469951 |
| rs7977734    | 12 | 58301062 | -3.107 | 0.00188909  | -3.538 | 0.000402927 |
| rs7135114    | 12 | 59306389 | -3.048 | 0.00230322  | -3.536 | 0.00040632  |
| rs2088549    | 12 | 61227112 | -2.876 | 0.00402961  | -3.518 | 0.000434858 |
| rs1021969    | 12 | 61925262 | -2.873 | 0.00406388  | -3.509 | 0.000449215 |
| rs12372119   | 12 | 63665997 | -2.964 | 0.00303459  | -3.724 | 0.000195989 |
| rs11175376   | 12 | 64783798 | -3.105 | 0.00190445  | -4.009 | 6.09785E-05 |
| rs11175577   | 12 | 65264090 | -3.025 | 0.0024854   | -4.012 | 6.02037E-05 |
| rs2583939    | 12 | 66213521 | -3.119 | 0.00181179  | -4.093 | 4.26661E-05 |
| rs1252286    | 12 | 67268091 | -2.956 | 0.00311214  | -3.98  | 6.87961E-05 |
| rs6581752    | 12 | 67777751 | -2.973 | 0.00294676  | -3.942 | 8.07204E-05 |
| rs7959617    | 12 | 68860439 | -3.163 | 0.00155906  | -3.724 | 0.000196282 |
| rs6581895    | 12 | 69842643 | -3.103 | 0.00191759  | -3.589 | 0.000332333 |
| rs2717417    | 12 | 71029431 | -3.204 | 0.0013538   | -3.363 | 0.000771464 |
| rs328744     | 12 | 72181905 | -3.332 | 0.000861091 | -2.95  | 0.00317374  |
| rs305396     | 12 | 73022080 | -3.368 | 0.000758039 | -2.927 | 0.00342488  |
| rs4883493    | 12 | 74142917 | -3.294 | 0.000988248 | -2.85  | 0.00437626  |
| rs952408     | 12 | 75353279 | -3.295 | 0.000983485 | -2.797 | 0.00515112  |
| rs3942161    | 12 | 76282335 | -2.822 | 0.00476686  | -2.401 | 0.0163579   |
| rs11106216   | 12 | 76672829 | -2.746 | 0.0060284   | -2.358 | 0.0183665   |
| rs6538405    | 12 | 78234093 | -2.552 | 0.0106955   | -2.061 | 0.0393284   |



|            |    |           |        |             |        |            |
|------------|----|-----------|--------|-------------|--------|------------|
| rs12310582 | 12 | 79299233  | -2.422 | 0.0154203   | -2.181 | 0.02919    |
| rs2463171  | 12 | 80106323  | -2.29  | 0.0220349   | -2.189 | 0.0285817  |
| rs73358845 | 12 | 81192366  | -2.298 | 0.0215538   | -2.45  | 0.0142774  |
| rs4077193  | 12 | 81477961  | -2.314 | 0.0206616   | -2.413 | 0.0158121  |
| rs12831678 | 12 | 82600267  | -2.252 | 0.0243472   | -2.425 | 0.0153139  |
| rs11115457 | 12 | 83235221  | -2.369 | 0.0178315   | -2.665 | 0.00770714 |
| rs6539807  | 12 | 84345481  | -2.581 | 0.00985722  | -2.522 | 0.0116628  |
| rs1818930  | 12 | 85391419  | -2.645 | 0.00816218  | -2.485 | 0.0129593  |
| rs2063574  | 12 | 85795202  | -2.575 | 0.0100224   | -2.42  | 0.0155204  |
| rs10858415 | 12 | 86711611  | -2.623 | 0.00872365  | -2.425 | 0.015294   |
| rs2897357  | 12 | 87064494  | -2.639 | 0.00832293  | -2.429 | 0.0151214  |
| rs4842589  | 12 | 88314167  | -2.728 | 0.00637279  | -2.533 | 0.0112938  |
| rs405647   | 12 | 89213519  | -2.836 | 0.00457462  | -2.54  | 0.0110985  |
| rs704118   | 12 | 90808850  | -3.027 | 0.00246803  | -2.542 | 0.0110174  |
| rs9645774  | 12 | 91380633  | -3.141 | 0.00168553  | -2.519 | 0.011756   |
| rs4842536  | 12 | 92399062  | -3.208 | 0.00133808  | -2.392 | 0.0167471  |
| rs11106906 | 12 | 93593980  | -3.503 | 0.000459549 | -2.259 | 0.0239119  |
| rs10859541 | 12 | 94010187  | -3.621 | 0.000293595 | -2.229 | 0.0258035  |
| rs2651962  | 12 | 95002363  | -4.038 | 5.39659E-05 | -2.405 | 0.0161713  |
| rs6538643  | 12 | 95943104  | -4.254 | 2.09658E-05 | -2.563 | 0.0103669  |
| rs6538685  | 12 | 96312107  | -4.291 | 1.78263E-05 | -2.569 | 0.0102092  |
| rs57581372 | 12 | 97439913  | -4.364 | 1.27661E-05 | -2.641 | 0.00827097 |
| rs11109058 | 12 | 97873725  | -4.421 | 9.81274E-06 | -2.698 | 0.00698346 |
| rs829881   | 12 | 98881228  | -4.382 | 1.17722E-05 | -2.644 | 0.00819836 |
| rs4764737  | 12 | 100769673 | -4.403 | 1.06843E-05 | -2.536 | 0.0112118  |
| rs7303958  | 12 | 101762276 | -4.368 | 1.25118E-05 | -2.551 | 0.0107312  |
| rs4337094  | 12 | 102342103 | -4.127 | 3.67405E-05 | -2.415 | 0.0157348  |
| rs12820008 | 12 | 103152029 | -3.929 | 8.52313E-05 | -2.321 | 0.0202741  |
| rs6539098  | 12 | 104102503 | -3.714 | 0.000204062 | -2.27  | 0.023184   |
| rs2081807  | 12 | 105099408 | -3.589 | 0.000332261 | -2.115 | 0.0344676  |
| rs11112724 | 12 | 106162116 | -3.273 | 0.00106495  | -1.706 | 0.0879984  |
| rs919837   | 12 | 106507724 | -3.061 | 0.00220487  | -1.686 | 0.0918524  |
| rs6539321  | 12 | 107732064 | -3.32  | 0.00089939  | -1.767 | 0.0771811  |
| rs7963027  | 12 | 108894909 | -3.615 | 0.00030082  | -1.659 | 0.0970809  |
| rs747902   | 12 | 109431607 | -3.684 | 0.000229409 | -1.664 | 0.0961707  |
| rs7304705  | 12 | 111438001 | -3.644 | 0.00026846  | -1.583 | 0.113517   |
| rs2238151  | 12 | 112211833 | -3.625 | 0.000289495 | -1.476 | 0.139814   |
| rs73425727 | 12 | 113452916 | -3.273 | 0.00106365  | -1.114 | 0.265372   |
| rs11066989 | 12 | 114646834 | -3.069 | 0.00214792  | -0.48  | 0.631346   |
| rs10161338 | 12 | 115865303 | -3.023 | 0.00250457  | -0.072 | 0.942898   |
| rs7969190  | 12 | 116970692 | -3.169 | 0.00152868  | -0.228 | 0.820011   |
| rs55900757 | 12 | 117236939 | -3.147 | 0.00165063  | -0.2   | 0.841855   |
| rs4766886  | 12 | 118345121 | -2.771 | 0.00558892  | 0.009  | 0.992696   |
| rs1503767  | 12 | 118889488 | -2.61  | 0.00904942  | -0.035 | 0.971786   |
| rs2555252  | 12 | 119713394 | -2.464 | 0.013754    | -0.166 | 0.868195   |
| rs280591   | 12 | 120290718 | -2.273 | 0.0230301   | -0.122 | 0.90276    |
| rs1464516  | 12 | 121122766 | -2.222 | 0.0262526   | -0.102 | 0.91915    |
| rs7398701  | 12 | 121794068 | -2.311 | 0.0208559   | -0.182 | 0.855561   |
| rs1169076  | 12 | 122429484 | -2.313 | 0.0206962   | -0.197 | 0.844036   |
| rs11057251 | 12 | 123791227 | -2.162 | 0.0306436   | -0.12  | 0.904593   |
| rs838948   | 12 | 125178410 | -2.149 | 0.0316669   | -0.041 | 0.967448   |
| rs2190481  | 12 | 126272036 | -1.704 | 0.088327    | 0.224  | 0.82283    |
| rs12304312 | 12 | 126849141 | -1.533 | 0.125224    | 0.247  | 0.804838   |

|            |    |           |        |            |        |          |
|------------|----|-----------|--------|------------|--------|----------|
| rs2278748  | 12 | 127767643 | -1.505 | 0.132197   | 0.22   | 0.825606 |
| rs1193390  | 12 | 128814339 | -1.113 | 0.265699   | 0.434  | 0.664056 |
| rs955452   | 12 | 129157873 | -1.264 | 0.206242   | 0.367  | 0.713426 |
| rs10847935 | 12 | 130237339 | -1.597 | 0.110206   | -0.158 | 0.874195 |
| rs4759816  | 12 | 131455442 | -2.221 | 0.0263354  | -1.116 | 0.264572 |
| rs11831366 | 12 | 132498260 | -2.328 | 0.0198931  | -1.524 | 0.127565 |
| rs11147232 | 12 | 133012314 | -2.384 | 0.0171354  | -1.588 | 0.112331 |
| rs59606937 | 12 | 133758849 | -2.404 | 0.0162257  | -1.56  | 0.118748 |
| rs4769700  | 13 | 20098320  | -0.431 | 0.666315   | 1.467  | 0.142288 |
| rs7994748  | 13 | 20766130  | -0.43  | 0.667219   | 1.478  | 0.139325 |
| rs61076394 | 13 | 21511213  | -0.448 | 0.654291   | 1.489  | 0.136448 |
| rs1885894  | 13 | 22647183  | -0.723 | 0.469694   | 1.406  | 0.159773 |
| rs9510171  | 13 | 22960130  | -0.899 | 0.368473   | 1.214  | 0.224739 |
| rs9510738  | 13 | 24014194  | -0.994 | 0.320358   | 1.077  | 0.281379 |
| rs7327620  | 13 | 24342934  | -1.019 | 0.308275   | 1.057  | 0.290696 |
| rs9511575  | 13 | 25566804  | -1.412 | 0.157994   | 0.337  | 0.736195 |
| rs7990216  | 13 | 25900838  | -1.481 | 0.138577   | 0.309  | 0.757237 |
| rs9554176  | 13 | 28426279  | -1.76  | 0.0783535  | -0.099 | 0.921    |
| rs4272875  | 13 | 29730973  | -1.929 | 0.0537599  | -0.486 | 0.627112 |
| rs9506206  | 13 | 30164963  | -1.987 | 0.0469056  | -0.586 | 0.558011 |
| rs9579606  | 13 | 31143391  | -2.124 | 0.0336548  | -1.111 | 0.266471 |
| rs3761870  | 13 | 31898368  | -2.263 | 0.0236333  | -1.093 | 0.27449  |
| rs204123   | 13 | 32589781  | -2.332 | 0.0196889  | -1.095 | 0.273313 |
| rs6561600  | 13 | 33431045  | -2.483 | 0.0130141  | -1.247 | 0.212565 |
| rs7991539  | 13 | 34495174  | -2.5   | 0.0124322  | -1.239 | 0.215333 |
| rs2210007  | 13 | 35126337  | -2.72  | 0.00653493 | -1.427 | 0.153621 |
| rs4606576  | 13 | 36122567  | -2.677 | 0.00741914 | -1.601 | 0.109277 |
| rs9547621  | 13 | 37178919  | -2.482 | 0.0130811  | -1.549 | 0.121448 |
| rs9532117  | 13 | 38363047  | -2.416 | 0.0157098  | -1.548 | 0.121559 |
| rs9532209  | 13 | 38932949  | -2.319 | 0.0204053  | -1.343 | 0.179151 |
| rs9548610  | 13 | 39675911  | -2.224 | 0.0261312  | -1.186 | 0.235615 |
| rs2039003  | 13 | 40818529  | -1.947 | 0.0515915  | -0.928 | 0.353657 |
| rs1572018  | 13 | 41715282  | -1.796 | 0.0724719  | -0.833 | 0.405111 |
| rs9532984  | 13 | 42634693  | -1.621 | 0.105013   | -0.639 | 0.522796 |
| rs36081563 | 13 | 43565881  | -1.809 | 0.0703995  | -0.898 | 0.369427 |
| rs9533770  | 13 | 44677509  | -1.486 | 0.137233   | -1.093 | 0.274531 |
| rs9567518  | 13 | 45607959  | -1.229 | 0.219195   | -1.201 | 0.229715 |
| rs17068920 | 13 | 46142220  | -1.194 | 0.232551   | -1.279 | 0.20102  |
| rs644061   | 13 | 47063241  | -1.182 | 0.237344   | -1.358 | 0.174457 |
| rs9567896  | 13 | 48177121  | -1.15  | 0.250098   | -1.233 | 0.217735 |
| rs7325962  | 13 | 49067103  | -1.208 | 0.226999   | -1.331 | 0.183031 |
| rs7322971  | 13 | 50127719  | -1.193 | 0.232762   | -1.452 | 0.146604 |
| rs797498   | 13 | 51272084  | -1.124 | 0.261161   | -1.442 | 0.149433 |
| rs7321057  | 13 | 51682014  | -1.091 | 0.275099   | -1.35  | 0.176948 |
| rs6561666  | 13 | 52930045  | -1.06  | 0.288958   | -1.329 | 0.183703 |
| rs1343609  | 13 | 53700585  | -1.056 | 0.291099   | -1.339 | 0.180579 |
| rs7999500  | 13 | 54638436  | -0.882 | 0.377731   | -1.281 | 0.200334 |
| rs9316735  | 13 | 55147817  | -0.782 | 0.43445    | -1.245 | 0.213182 |
| rs2801604  | 13 | 56467309  | -0.66  | 0.509354   | -1.232 | 0.218076 |
| rs4520734  | 13 | 57664320  | -0.64  | 0.521996   | -1.256 | 0.2092   |
| rs35906481 | 13 | 57919221  | -0.646 | 0.518312   | -1.264 | 0.206265 |
| rs1330754  | 13 | 59091229  | -0.843 | 0.399113   | -1.384 | 0.166288 |
| rs1622710  | 13 | 60106925  | -0.865 | 0.387036   | -1.418 | 0.156048 |

|            |    |           |        |          |        |           |
|------------|----|-----------|--------|----------|--------|-----------|
| rs7490808  | 13 | 63268986  | -0.501 | 0.616194 | -1.197 | 0.231286  |
| rs4363749  | 13 | 64307261  | -0.479 | 0.631705 | -1.19  | 0.233929  |
| rs9539904  | 13 | 64605115  | -0.479 | 0.631894 | -1.197 | 0.231301  |
| rs4884595  | 13 | 65621621  | -0.455 | 0.648912 | -1.379 | 0.167969  |
| rs12876796 | 13 | 66328476  | -0.356 | 0.721564 | -1.367 | 0.171562  |
| rs1020228  | 13 | 67376347  | -0.214 | 0.830667 | -1.277 | 0.201561  |
| rs9541177  | 13 | 68183928  | -0.182 | 0.855454 | -1.248 | 0.212153  |
| rs80354737 | 13 | 68746707  | -0.166 | 0.867889 | -1.246 | 0.212731  |
| rs1992744  | 13 | 69759676  | -0.242 | 0.808639 | -1.348 | 0.177756  |
| rs1157877  | 13 | 70753985  | -0.187 | 0.851286 | -1.34  | 0.180286  |
| rs10492467 | 13 | 71741392  | -0.041 | 0.967694 | -1.221 | 0.222219  |
| rs17088406 | 13 | 72272535  | 0.035  | 0.972207 | -1.137 | 0.255728  |
| rs7996083  | 13 | 73308901  | -0.055 | 0.95625  | -0.913 | 0.361405  |
| rs9318155  | 13 | 73878676  | -0.222 | 0.824356 | -0.931 | 0.351617  |
| rs9318253  | 13 | 74870513  | -0.052 | 0.958714 | -0.3   | 0.764171  |
| rs9530435  | 13 | 75993887  | -0.009 | 0.992421 | -0.114 | 0.909361  |
| rs9544299  | 13 | 77136614  | 0.177  | 0.859532 | 0.337  | 0.735793  |
| rs9530646  | 13 | 77973501  | 0.142  | 0.886769 | 0.472  | 0.636596  |
| rs9544656  | 13 | 78550841  | 0.138  | 0.890241 | 0.508  | 0.61124   |
| rs9318602  | 13 | 79555791  | 0.342  | 0.732394 | 0.803  | 0.42181   |
| rs2149126  | 13 | 79817124  | 0.384  | 0.700799 | 0.847  | 0.396923  |
| rs11911    | 13 | 80910851  | 0.435  | 0.663627 | 0.95   | 0.341947  |
| rs7332661  | 13 | 81366251  | 0.534  | 0.593487 | 1.108  | 0.267841  |
| rs4403931  | 13 | 83605204  | 0.244  | 0.80711  | 1.163  | 0.244915  |
| rs9546529  | 13 | 84414549  | 0.205  | 0.837757 | 1.159  | 0.24641   |
| rs28830285 | 13 | 86626437  | 0.184  | 0.853843 | 1.311  | 0.189915  |
| rs72636481 | 13 | 87823937  | 0.229  | 0.819022 | 1.422  | 0.154901  |
| rs9586150  | 13 | 88622833  | 0.222  | 0.824455 | 1.46   | 0.144369  |
| rs7984044  | 13 | 91049604  | 0.166  | 0.868143 | 1.457  | 0.145086  |
| rs527437   | 13 | 93735200  | 0.286  | 0.775233 | 1.641  | 0.100899  |
| rs7982191  | 13 | 94258470  | 0.297  | 0.766095 | 1.645  | 0.100028  |
| rs41275894 | 13 | 95353882  | 0.258  | 0.796443 | 1.604  | 0.108709  |
| rs9524891  | 13 | 95942561  | 0.332  | 0.740149 | 1.717  | 0.0859655 |
| rs79609728 | 13 | 97148782  | 0.385  | 0.700489 | 1.786  | 0.0740848 |
| rs9556688  | 13 | 97835876  | 0.368  | 0.712672 | 1.799  | 0.0720063 |
| rs539122   | 13 | 98743414  | -0.005 | 0.995975 | 1.623  | 0.104497  |
| rs12853441 | 13 | 99377948  | -0.252 | 0.801239 | 1.551  | 0.120913  |
| rs1000022  | 13 | 100461219 | -0.672 | 0.501339 | 1.27   | 0.204192  |
| rs9300619  | 13 | 101403078 | -0.823 | 0.410446 | 1.118  | 0.263615  |
| rs7985169  | 13 | 102037829 | -0.82  | 0.412035 | 0.974  | 0.330048  |
| rs7993988  | 13 | 103187140 | -0.551 | 0.581404 | 0.854  | 0.393136  |
| rs6491743  | 13 | 104061332 | -0.425 | 0.671072 | 0.928  | 0.35354   |
| rs9582808  | 13 | 104785997 | -0.229 | 0.818757 | 0.846  | 0.397476  |
| rs1572510  | 13 | 105381134 | -0.139 | 0.889788 | 0.336  | 0.736812  |
| rs1999884  | 13 | 106280602 | -0.15  | 0.880679 | 0.39   | 0.696503  |
| rs7337946  | 13 | 107491437 | -0.705 | 0.480589 | 0.116  | 0.907404  |
| rs9301236  | 13 | 108228141 | -0.886 | 0.375389 | -0.076 | 0.939752  |
| rs2082256  | 13 | 109469137 | -0.72  | 0.471243 | 0.082  | 0.934265  |
| rs7989360  | 13 | 110339997 | -0.915 | 0.360149 | -0.11  | 0.912522  |
| rs7139699  | 13 | 111005475 | -0.988 | 0.323237 | -0.195 | 0.845031  |
| rs1183183  | 13 | 112136705 | -0.934 | 0.35023  | 0.159  | 0.873437  |
| rs873772   | 13 | 112663016 | -0.887 | 0.374844 | 0.456  | 0.648145  |
| rs1765769  | 13 | 113529257 | -0.839 | 0.401681 | 0.307  | 0.759142  |

|            |    |           |        |           |        |          |
|------------|----|-----------|--------|-----------|--------|----------|
| rs4630437  | 13 | 113950036 | -0.949 | 0.342393  | 0.263  | 0.792744 |
| rs1620265  | 14 | 21022833  | 0.465  | 0.641867  | 1.377  | 0.168364 |
| rs34751221 | 14 | 21626166  | -0.041 | 0.967285  | 1.057  | 0.290371 |
| rs222674   | 14 | 23987990  | -0.759 | 0.447909  | 1.042  | 0.29749  |
| rs73600715 | 14 | 24420204  | -0.858 | 0.390813  | 1.107  | 0.268224 |
| rs854360   | 14 | 25260507  | -0.862 | 0.388646  | 1.109  | 0.267538 |
| rs8015766  | 14 | 25977770  | -0.986 | 0.324027  | 1.01   | 0.312721 |
| rs4983181  | 14 | 27159901  | -1.076 | 0.281857  | 0.783  | 0.43347  |
| rs992745   | 14 | 27810095  | -1.184 | 0.236548  | 0.816  | 0.414637 |
| rs8011192  | 14 | 28788618  | -1.211 | 0.22574   | 0.886  | 0.375586 |
| rs28584261 | 14 | 29322968  | -1.272 | 0.203373  | 0.935  | 0.349708 |
| rs7157367  | 14 | 30305861  | -1.121 | 0.262222  | 1.211  | 0.225952 |
| rs179075   | 14 | 30792163  | -1.135 | 0.25619   | 1.24   | 0.215    |
| rs1952896  | 14 | 32021438  | -1.102 | 0.27054   | 0.996  | 0.319456 |
| rs7146913  | 14 | 32914154  | -1.219 | 0.222773  | 0.615  | 0.538243 |
| rs1012023  | 14 | 33956209  | -2.11  | 0.0348883 | 0.019  | 0.984981 |
| rs28507410 | 14 | 34318711  | -2.101 | 0.0356814 | 0.125  | 0.900706 |
| rs2383676  | 14 | 35229647  | -1.745 | 0.0810002 | 0.629  | 0.529313 |
| rs847520   | 14 | 36459500  | -1.489 | 0.136589  | 0.876  | 0.381043 |
| rs7156044  | 14 | 36945739  | -1.316 | 0.188125  | 0.992  | 0.321374 |
| rs10138206 | 14 | 37732188  | -1.224 | 0.221081  | 1.069  | 0.28494  |
| rs12433553 | 14 | 39398981  | -1.082 | 0.279241  | 1.151  | 0.249691 |
| rs1957192  | 14 | 40365223  | -1.091 | 0.275382  | 1.117  | 0.264171 |
| rs9323043  | 14 | 41548627  | -1.147 | 0.25155   | 1.019  | 0.308201 |
| rs61993291 | 14 | 42698292  | -1.142 | 0.253556  | 0.967  | 0.333528 |
| rs4906157  | 14 | 43275797  | -1.056 | 0.291154  | 1.044  | 0.296474 |
| rs12885137 | 14 | 44018652  | -0.942 | 0.346334  | 1.046  | 0.295364 |
| rs229729   | 14 | 45221103  | -0.826 | 0.408817  | 0.991  | 0.321773 |
| rs2150214  | 14 | 45822243  | -0.825 | 0.40943   | 0.987  | 0.323684 |
| rs858888   | 14 | 46728896  | -0.832 | 0.405674  | 0.965  | 0.334748 |
| rs1954231  | 14 | 47428100  | -0.795 | 0.42659   | 0.968  | 0.333059 |
| rs9323155  | 14 | 48401001  | -0.809 | 0.418505  | 0.928  | 0.353657 |
| rs4078432  | 14 | 48997206  | -0.844 | 0.398533  | 0.895  | 0.370796 |
| rs6572579  | 14 | 49904851  | -0.776 | 0.437798  | 0.862  | 0.388433 |
| rs1565835  | 14 | 51143784  | -0.756 | 0.449698  | 0.905  | 0.365365 |
| rs10133044 | 14 | 51990116  | -0.739 | 0.459688  | 0.849  | 0.395894 |
| rs1057804  | 14 | 52434055  | -0.766 | 0.443937  | 0.791  | 0.428719 |
| rs61094873 | 14 | 53479254  | -0.696 | 0.48639   | 0.876  | 0.381186 |
| rs56312905 | 14 | 54437832  | -0.376 | 0.707232  | 1.029  | 0.30331  |
| rs2274271  | 14 | 55655692  | -0.372 | 0.709754  | 0.59   | 0.555298 |
| rs1952883  | 14 | 56381399  | -0.291 | 0.770845  | 0.702  | 0.482809 |
| rs7144018  | 14 | 57607067  | -0.284 | 0.776408  | 1.046  | 0.295761 |
| rs11625443 | 14 | 57876575  | -0.338 | 0.735283  | 0.942  | 0.346025 |
| rs221327   | 14 | 59117118  | -0.52  | 0.60322   | 0.634  | 0.525808 |
| rs8017813  | 14 | 59438476  | -0.577 | 0.563739  | 0.535  | 0.592391 |
| rs9323357  | 14 | 60394828  | -0.502 | 0.615853  | 0.47   | 0.63818  |
| rs12878831 | 14 | 60713872  | -0.502 | 0.615878  | 0.436  | 0.66283  |
| rs927686   | 14 | 61912138  | -0.445 | 0.656453  | 0.364  | 0.71588  |
| rs2301113  | 14 | 62206548  | -0.491 | 0.623767  | 0.311  | 0.755959 |
| rs915065   | 14 | 63177481  | -0.504 | 0.614433  | 0.159  | 0.873421 |
| rs6573513  | 14 | 63855760  | -0.541 | 0.588344  | 0.017  | 0.986485 |
| rs7158393  | 14 | 64594660  | -0.682 | 0.495061  | -0.115 | 0.908258 |
| rs1953233  | 14 | 65573162  | -1.016 | 0.309846  | -0.483 | 0.628961 |

|             |    |           |        |             |        |          |
|-------------|----|-----------|--------|-------------|--------|----------|
| rs986201    | 14 | 66536914  | -1.484 | 0.137895    | -0.997 | 0.318711 |
| rs7141519   | 14 | 67524525  | -1.693 | 0.0904125   | -1.116 | 0.264623 |
| rs9323497   | 14 | 67873128  | -1.704 | 0.0884342   | -1.126 | 0.260358 |
| rs12881502  | 14 | 68783791  | -1.738 | 0.082142    | -1.121 | 0.262401 |
| rs761898    | 14 | 69480381  | -2.039 | 0.041471    | -1.082 | 0.279233 |
| rs8022091   | 14 | 70655751  | -2.19  | 0.0285202   | -0.933 | 0.351072 |
| rs8009032   | 14 | 70985876  | -2.234 | 0.0254987   | -0.816 | 0.414715 |
| rs1204997   | 14 | 72183309  | -2.596 | 0.00943467  | -0.605 | 0.545105 |
| rs2238176   | 14 | 72967773  | -2.827 | 0.00469763  | -0.649 | 0.516159 |
| rs9672127   | 14 | 74065221  | -3.098 | 0.00195113  | -0.761 | 0.446852 |
| rs3784024   | 14 | 75045389  | -3.109 | 0.00187801  | -0.69  | 0.490081 |
| rs4903332   | 14 | 76063344  | -3.138 | 0.00170128  | -0.581 | 0.560961 |
| rs2205181   | 14 | 76454119  | -3.311 | 0.000930328 | -0.696 | 0.486155 |
| rs4903610   | 14 | 78040393  | -3.343 | 0.000828877 | -0.899 | 0.36868  |
| rs7142344   | 14 | 79250144  | -3.441 | 0.000579235 | -1.066 | 0.286313 |
| rs12885724  | 14 | 79997085  | -3.274 | 0.0010587   | -0.866 | 0.386655 |
| rs2273173   | 14 | 80770951  | -3.187 | 0.00143957  | -0.704 | 0.481409 |
| rs11845164  | 14 | 81531754  | -3.166 | 0.00154425  | -0.609 | 0.542303 |
| rs11846261  | 14 | 82108137  | -3.266 | 0.00109234  | -0.615 | 0.53861  |
| rs2798387   | 14 | 83060105  | -3.306 | 0.00094769  | -0.6   | 0.548628 |
| rs1023877   | 14 | 83701352  | -3.31  | 0.000932188 | -0.538 | 0.590311 |
| rs709879    | 14 | 85395171  | -3.347 | 0.000818181 | -0.489 | 0.625141 |
| rs4899899   | 14 | 86815463  | -3.371 | 0.000748837 | -0.533 | 0.594211 |
| rs1420810   | 14 | 87503152  | -3.334 | 0.000856382 | -0.503 | 0.614621 |
| rs7155220   | 14 | 88724053  | -3.238 | 0.00120312  | -0.505 | 0.613424 |
| rs7141800   | 14 | 89804507  | -3.177 | 0.00148717  | -0.579 | 0.562839 |
| rs3825663   | 14 | 90429749  | -3.325 | 0.000883984 | -0.597 | 0.55018  |
| rs8003457   | 14 | 91233834  | -3.455 | 0.000550477 | -0.849 | 0.396031 |
| rs4243691   | 14 | 92262190  | -3.634 | 0.000278703 | -0.938 | 0.34799  |
| rs6575264   | 14 | 92985113  | -3.756 | 0.000172604 | -0.96  | 0.336893 |
| rs28603252  | 14 | 94229604  | -3.606 | 0.00031083  | -0.781 | 0.434883 |
| rs8022629   | 14 | 94935108  | -3.217 | 0.0012934   | -0.378 | 0.705345 |
| rs2369049   | 14 | 96171851  | -2.473 | 0.0133958   | -0.207 | 0.835621 |
| rs7147132   | 14 | 96577787  | -2.36  | 0.0182948   | -0.118 | 0.906114 |
| rs8005462   | 14 | 97555659  | -2.028 | 0.0425703   | -0.074 | 0.940623 |
| rs1003229   | 14 | 98171617  | -1.949 | 0.0513337   | -0.235 | 0.814439 |
| rs8006467   | 14 | 99400269  | -1.589 | 0.112019    | -0.204 | 0.838628 |
| rs74084680  | 14 | 100422683 | -1.799 | 0.0719806   | -0.585 | 0.558288 |
| rs2281610   | 14 | 101510060 | -1.854 | 0.06378     | -0.876 | 0.380823 |
| rs12880263  | 14 | 102230414 | -1.622 | 0.104813    | -0.995 | 0.319533 |
| rs9671376   | 14 | 103370163 | -1.494 | 0.13508     | -0.918 | 0.358758 |
| rs4243749   | 14 | 104849219 | -1.086 | 0.277289    | -0.543 | 0.587346 |
| rs17112080  | 14 | 107232902 | -0.745 | 0.456254    | -0.523 | 0.600775 |
| rs12900552  | 15 | 23077857  | -0.599 | 0.548962    | 1.039  | 0.298668 |
| rs6576431   | 15 | 23782201  | -0.608 | 0.543489    | 1.03   | 0.303008 |
| rs6576379   | 15 | 24977909  | -0.604 | 0.545731    | 1.007  | 0.313731 |
| rs2714757   | 15 | 25478233  | -0.886 | 0.375363    | 0.462  | 0.644394 |
| rs6576551   | 15 | 26476175  | -1.494 | 0.135204    | -0.403 | 0.687264 |
| rs8042276   | 15 | 27694075  | -1.824 | 0.0681323   | -0.926 | 0.354351 |
| rs1448484   | 15 | 28283441  | -1.763 | 0.0779164   | -1.14  | 0.254405 |
| rs540364    | 15 | 29567212  | -1.985 | 0.0471049   | -1.617 | 0.105833 |
| rs140484154 | 15 | 30669536  | -1.948 | 0.0513891   | -1.492 | 0.135768 |
| rs11630449  | 15 | 31614741  | -1.971 | 0.0487451   | -1.484 | 0.137892 |

|            |    |          |        |            |        |          |
|------------|----|----------|--------|------------|--------|----------|
| rs12908877 | 15 | 32323454 | -2.286 | 0.0222411  | -1.642 | 0.100588 |
| rs7173247  | 15 | 33458893 | -2.121 | 0.0339515  | -1.479 | 0.139241 |
| rs638169   | 15 | 34268336 | -1.888 | 0.0589802  | -1.141 | 0.253981 |
| rs1376785  | 15 | 35112710 | -1.659 | 0.0971112  | -0.99  | 0.322113 |
| rs2589527  | 15 | 35518710 | -1.66  | 0.0969813  | -0.955 | 0.339612 |
| rs1435684  | 15 | 36385023 | -1.586 | 0.112643   | -0.883 | 0.377007 |
| rs8041147  | 15 | 37298358 | -1.447 | 0.147791   | -0.92  | 0.357789 |
| rs8035530  | 15 | 38297066 | -0.903 | 0.366711   | -0.567 | 0.570908 |
| rs671724   | 15 | 39417955 | -0.111 | 0.911902   | -0.307 | 0.759099 |
| rs2618157  | 15 | 39844315 | 0.426  | 0.670001   | -0.45  | 0.65259  |
| rs679882   | 15 | 40759347 | 0.827  | 0.408368   | -0.697 | 0.485678 |
| rs9806683  | 15 | 41193316 | 0.886  | 0.375779   | -0.684 | 0.493818 |
| rs8033080  | 15 | 42441711 | 1.136  | 0.255882   | -0.623 | 0.532989 |
| rs12594855 | 15 | 42939904 | 1.192  | 0.233449   | -0.607 | 0.543651 |
| rs572837   | 15 | 43823813 | 1.206  | 0.227894   | -0.638 | 0.523726 |
| rs2412822  | 15 | 44223187 | 1.225  | 0.220404   | -0.64  | 0.521903 |
| rs1648299  | 15 | 45491394 | 1.226  | 0.220101   | -0.601 | 0.548107 |
| rs1030588  | 15 | 46726181 | 0.675  | 0.499802   | -1.043 | 0.296797 |
| rs12594800 | 15 | 47963869 | 0.791  | 0.428948   | -0.808 | 0.41937  |
| rs1834640  | 15 | 48392165 | 0.768  | 0.44266    | -0.875 | 0.381484 |
| rs11631087 | 15 | 49262185 | 1.117  | 0.264047   | -0.641 | 0.521475 |
| rs2414006  | 15 | 50329032 | 0.953  | 0.340731   | -0.819 | 0.412997 |
| rs879046   | 15 | 51492263 | 0.853  | 0.393448   | -0.851 | 0.39458  |
| rs7175314  | 15 | 52650328 | 0.625  | 0.532252   | -1.125 | 0.260404 |
| rs2440352  | 15 | 53145219 | 0.611  | 0.541181   | -1.138 | 0.255049 |
| rs11071021 | 15 | 54356291 | 0.106  | 0.915907   | -1.155 | 0.248074 |
| rs4776239  | 15 | 54967175 | 0.082  | 0.934626   | -1.212 | 0.225448 |
| rs2414418  | 15 | 55809660 | -0.079 | 0.937309   | -1.283 | 0.19933  |
| rs795794   | 15 | 56736367 | -0.307 | 0.758584   | -1.286 | 0.198458 |
| rs1652748  | 15 | 57170911 | -0.458 | 0.647265   | -1.347 | 0.177978 |
| rs2642654  | 15 | 58396973 | -0.99  | 0.3222     | -1.391 | 0.164185 |
| rs11071428 | 15 | 59614841 | -1.749 | 0.0802797  | -1.398 | 0.162009 |
| rs974828   | 15 | 60855555 | -2.251 | 0.0243918  | -1.446 | 0.148209 |
| rs4309342  | 15 | 61597447 | -2.581 | 0.00983996 | -1.334 | 0.182062 |
| rs6494313  | 15 | 62432905 | -2.521 | 0.0117108  | -1.347 | 0.17811  |
| rs11071682 | 15 | 62953214 | -2.66  | 0.00780848 | -1.398 | 0.161971 |
| rs7169228  | 15 | 63725186 | -2.624 | 0.00870106 | -1.229 | 0.219074 |
| rs11636327 | 15 | 64379865 | -2.466 | 0.0136701  | -1.11  | 0.267169 |
| rs6494488  | 15 | 65024204 | -2.453 | 0.0141804  | -1.115 | 0.264984 |
| rs919999   | 15 | 65847922 | -2.572 | 0.0101245  | -1.117 | 0.263839 |
| rs7179823  | 15 | 66355050 | -2.574 | 0.0100474  | -1.111 | 0.266613 |
| rs924311   | 15 | 67207563 | -2.385 | 0.0170868  | -0.917 | 0.359237 |
| rs1114159  | 15 | 68455381 | -2.309 | 0.0209656  | -0.844 | 0.398456 |
| rs10851795 | 15 | 69125194 | -2.351 | 0.0187408  | -0.92  | 0.35774  |
| rs2415047  | 15 | 69888378 | -2.239 | 0.0251293  | -0.578 | 0.563143 |
| rs4777280  | 15 | 70774693 | -1.931 | 0.053457   | -0.217 | 0.828576 |
| rs623354   | 15 | 71421023 | -1.797 | 0.0723634  | -0.047 | 0.962842 |
| rs4777498  | 15 | 72578072 | -1.559 | 0.119002   | 0.085  | 0.932194 |
| rs4776602  | 15 | 72846354 | -1.585 | 0.112867   | 0.076  | 0.939382 |
| rs7170484  | 15 | 74453873 | -1.933 | 0.0532592  | 0.187  | 0.851518 |
| rs34862454 | 15 | 75101530 | -2.192 | 0.028374   | 0.111  | 0.91133  |
| rs12050778 | 15 | 76126371 | -2.259 | 0.0239085  | 0.052  | 0.958746 |
| rs11636648 | 15 | 77335891 | -2.361 | 0.0182478  | -0.05  | 0.960217 |

|               |    |           |        |            |        |           |
|---------------|----|-----------|--------|------------|--------|-----------|
| rs60886924    | 15 | 77948270  | -2.427 | 0.0152169  | -0.069 | 0.944825  |
| rs1825089     | 15 | 78997562  | -2.722 | 0.00648975 | -0.162 | 0.871234  |
| rs7172950     | 15 | 79485181  | -2.8   | 0.00511122 | -0.192 | 0.84764   |
| rs6495489     | 15 | 80622567  | -2.496 | 0.0125713  | 0.149  | 0.881829  |
| rs2867054     | 15 | 81362381  | -2.089 | 0.0367421  | 0.423  | 0.67262   |
| rs8040966     | 15 | 81904662  | -2.094 | 0.036281   | 0.462  | 0.644138  |
| rs201076145   | 15 | 82894302  | -2.007 | 0.0447061  | 0.472  | 0.636851  |
| rs4547300     | 15 | 83920383  | -1.908 | 0.0563843  | 0.56   | 0.575684  |
| rs2279926     | 15 | 84705426  | -1.936 | 0.052909   | 0.559  | 0.576327  |
| rs1986341     | 15 | 86402162  | -1.922 | 0.0545482  | 0.553  | 0.580267  |
| rs4362360     | 15 | 86940622  | -1.801 | 0.071745   | 0.616  | 0.5381    |
| rs4146309     | 15 | 88106887  | -1.199 | 0.230508   | 1.087  | 0.277156  |
| rs7182360     | 15 | 88991887  | -1.094 | 0.27384    | 1.223  | 0.221365  |
| rs7180160     | 15 | 89901347  | -1.024 | 0.305868   | 1.504  | 0.132669  |
| rs3844110     | 15 | 90514947  | -0.855 | 0.392757   | 1.664  | 0.0961032 |
| rs1266488     | 15 | 91458552  | -0.806 | 0.420469   | 1.704  | 0.0884703 |
| rs4505292     | 15 | 92385296  | -0.645 | 0.519145   | 1.666  | 0.0957779 |
| rs12908630    | 15 | 93176198  | -0.734 | 0.463118   | 1.695  | 0.0899997 |
| rs4350528     | 15 | 94163700  | -0.887 | 0.374831   | 1.427  | 0.153599  |
| rs965551      | 15 | 95345594  | -1.194 | 0.23254    | 0.472  | 0.637097  |
| rs28505797    | 15 | 95814327  | -1.431 | 0.15235    | 0.071  | 0.943603  |
| rs11045       | 15 | 96883321  | -1.358 | 0.174412   | 0.065  | 0.948051  |
| rs2399651     | 15 | 97768422  | -1.153 | 0.249075   | 0.082  | 0.934524  |
| rs7171736     | 15 | 98470417  | -0.859 | 0.390376   | 0.35   | 0.726609  |
| rs28682953    | 15 | 99149634  | -0.497 | 0.619236   | 0.581  | 0.561107  |
| rs73476563    | 15 | 100015648 | -0.019 | 0.985195   | 1.042  | 0.297544  |
| rs2246800     | 15 | 100574294 | 0.104  | 0.91712    | 1.069  | 0.285144  |
| rs4461053     | 15 | 101401592 | -0.147 | 0.882743   | 0.871  | 0.383495  |
| rs710079      | 16 | 129223    | 0.163  | 0.870723   | 0.36   | 0.7186    |
| rs2369842     | 16 | 1366425   | -0.492 | 0.622469   | 0.413  | 0.679966  |
| rs6600162     | 16 | 1753332   | -0.673 | 0.500766   | 0.486  | 0.62696   |
| rs2285879     | 16 | 2810623   | -0.817 | 0.414047   | 0.623  | 0.533508  |
| Affx-12741849 | 16 | 4027423   | -1.054 | 0.291714   | 0.685  | 0.493631  |
| rs841190      | 16 | 4665287   | -1.104 | 0.269802   | 0.65   | 0.515705  |
| rs12933048    | 16 | 5694378   | -1.034 | 0.30118    | 0.595  | 0.552039  |
| rs8044038     | 16 | 6414783   | -1.017 | 0.309016   | 0.247  | 0.805002  |
| rs3785250     | 16 | 7604361   | -1.23  | 0.218773   | -0.268 | 0.788543  |
| rs7192148     | 16 | 8049148   | -1.577 | 0.11487    | -0.656 | 0.511913  |
| rs9925564     | 16 | 9229056   | -1.603 | 0.108976   | -0.918 | 0.358683  |
| rs11074742    | 16 | 10427647  | -1.23  | 0.21869    | -0.492 | 0.622622  |
| rs4780999     | 16 | 10907363  | -0.972 | 0.330836   | -0.465 | 0.642273  |
| rs13335494    | 16 | 12001772  | -0.909 | 0.363408   | -0.52  | 0.603252  |
| rs57062904    | 16 | 12479529  | -0.815 | 0.415243   | -0.533 | 0.59425   |
| rs8045971     | 16 | 13386119  | -0.477 | 0.633372   | -0.692 | 0.489013  |
| rs1004637     | 16 | 14205744  | -0.082 | 0.934752   | -0.56  | 0.575677  |
| rs7404526     | 16 | 15129162  | -0.313 | 0.75447    | -0.764 | 0.444815  |
| rs13335375    | 16 | 16018589  | -0.396 | 0.691753   | -0.77  | 0.441174  |
| rs8046024     | 16 | 17200685  | -0.076 | 0.939162   | -0.566 | 0.571404  |
| rs9933603     | 16 | 18051046  | 0.242  | 0.809079   | -0.181 | 0.856017  |
| rs11645375    | 16 | 19114842  | 0.379  | 0.705038   | 0.314  | 0.753369  |
| rs7202651     | 16 | 19802014  | 0.065  | 0.948363   | 0.222  | 0.824356  |
| rs9929808     | 16 | 20436043  | -0.077 | 0.938855   | 0.353  | 0.723981  |
| rs8057454     | 16 | 21264441  | -0.381 | 0.702921   | 0.077  | 0.938333  |

|               |    |          |        |           |        |           |
|---------------|----|----------|--------|-----------|--------|-----------|
| rs7764        | 16 | 22345191 | -0.314 | 0.753879  | 0.063  | 0.949744  |
| rs1503949     | 16 | 22958684 | -0.748 | 0.454582  | -0.199 | 0.842191  |
| rs10492796    | 16 | 24089753 | -1.227 | 0.219854  | -0.746 | 0.455522  |
| rs56891496    | 16 | 24958668 | -1.702 | 0.0886913 | -1.204 | 0.228621  |
| rs4787806     | 16 | 26054257 | -2.253 | 0.0242633 | -1.666 | 0.0957729 |
| rs9931131     | 16 | 26885155 | -2.092 | 0.0363998 | -1.538 | 0.12415   |
| rs2234900     | 16 | 27373972 | -2.143 | 0.0321289 | -1.43  | 0.152593  |
| rs28520136    | 16 | 28309340 | -2.111 | 0.0348102 | -1.281 | 0.200123  |
| rs7203982     | 16 | 28954860 | -2.208 | 0.0272189 | -1.248 | 0.212054  |
| rs235636      | 16 | 29790864 | -2.045 | 0.0408913 | -1.185 | 0.235955  |
| rs7187359     | 16 | 30703155 | -2.165 | 0.0304208 | -1.298 | 0.194239  |
| rs13331417    | 16 | 31569633 | -2.189 | 0.0286197 | -1.357 | 0.1748    |
| rs28641952    | 16 | 32574831 | -2.173 | 0.0297675 | -1.39  | 0.164469  |
| rs34769185    | 16 | 34654349 | -2.117 | 0.0342362 | -1.386 | 0.165793  |
| rs2304492     | 16 | 46697098 | -1.785 | 0.0742509 | -1.311 | 0.189847  |
| rs7197882     | 16 | 47755419 | -1.722 | 0.0851201 | -1.287 | 0.198021  |
| rs7193955     | 16 | 48122582 | -1.667 | 0.0954414 | -1.278 | 0.201336  |
| rs6500213     | 16 | 49086019 | -1.747 | 0.0806439 | -1.298 | 0.194329  |
| rs1872689     | 16 | 50301958 | -1.655 | 0.0979449 | -1.105 | 0.269201  |
| rs7195707     | 16 | 50711838 | -1.645 | 0.0998738 | -1.034 | 0.301006  |
| rs11863542    | 16 | 51683608 | -1.397 | 0.162268  | -0.49  | 0.624373  |
| rs28759054    | 16 | 52595193 | -1.227 | 0.219826  | -0.222 | 0.824643  |
| rs8050354     | 16 | 53649168 | -1.537 | 0.124306  | -0.261 | 0.794146  |
| rs7203944     | 16 | 54438254 | -1.374 | 0.169328  | 0.258  | 0.796107  |
| rs4270172     | 16 | 55157679 | -1.024 | 0.305967  | 0.607  | 0.543802  |
| rs62038706    | 16 | 55872627 | -0.909 | 0.363169  | 0.738  | 0.460789  |
| rs1151265     | 16 | 57045755 | -0.959 | 0.337353  | 0.633  | 0.526873  |
| rs6499886     | 16 | 57613658 | -0.948 | 0.343275  | 0.605  | 0.544903  |
| rs76230205    | 16 | 58708844 | -0.901 | 0.36748   | 0.722  | 0.47051   |
| rs1016902     | 16 | 61425918 | -0.842 | 0.39964   | 0.692  | 0.488929  |
| rs7200908     | 16 | 62550649 | -0.844 | 0.398617  | 0.539  | 0.589978  |
| rs198007      | 16 | 63120645 | -0.735 | 0.462263  | 0.562  | 0.574105  |
| Affx-13020071 | 16 | 64044440 | -0.624 | 0.532791  | 0.701  | 0.483012  |
| rs9926608     | 16 | 64863657 | -0.574 | 0.565863  | 0.69   | 0.490052  |
| rs7197514     | 16 | 65652630 | -0.631 | 0.527721  | 0.664  | 0.506638  |
| rs1110471     | 16 | 66350593 | -0.383 | 0.70195   | 0.439  | 0.660822  |
| rs9932319     | 16 | 67131601 | -0.498 | 0.618279  | 0.249  | 0.803602  |
| rs7203742     | 16 | 67605794 | -0.505 | 0.613656  | 0.236  | 0.813567  |
| rs7201944     | 16 | 68535227 | -0.514 | 0.606967  | 0.215  | 0.829495  |
| rs8057271     | 16 | 69267209 | -0.414 | 0.678642  | 0.095  | 0.923959  |
| rs13332431    | 16 | 70495785 | -0.265 | 0.791134  | 0.102  | 0.919047  |
| rs1354548     | 16 | 70995845 | -0.278 | 0.780687  | 0.011  | 0.991392  |
| rs7185448     | 16 | 72235558 | -0.271 | 0.786343  | -0.168 | 0.866513  |
| rs74028108    | 16 | 72808530 | -0.345 | 0.730131  | -0.305 | 0.760265  |
| rs9932434     | 16 | 74010302 | -0.299 | 0.764881  | -0.184 | 0.854021  |
| rs9928718     | 16 | 75076738 | -0.507 | 0.611999  | -0.148 | 0.882686  |
| rs7201030     | 16 | 76523792 | -0.516 | 0.605884  | -0.028 | 0.977578  |
| rs56215266    | 16 | 77331028 | -0.192 | 0.847827  | 0.383  | 0.702017  |
| rs8054751     | 16 | 78453119 | -0.144 | 0.885317  | 0.285  | 0.775962  |
| rs12599398    | 16 | 78786786 | -0.116 | 0.907267  | 0.281  | 0.778487  |
| rs11150220    | 16 | 79848178 | -0.446 | 0.655747  | -0.477 | 0.633083  |
| rs729936      | 16 | 80747757 | -0.129 | 0.897165  | -0.559 | 0.576432  |
| rs8045100     | 16 | 81603400 | -0.055 | 0.956504  | -0.286 | 0.774631  |



|            |    |          |        |           |        |          |
|------------|----|----------|--------|-----------|--------|----------|
| rs41530451 | 16 | 82048749 | -0.196 | 0.844517  | -0.509 | 0.610652 |
| rs9928871  | 16 | 83236406 | 0.16   | 0.872509  | -0.573 | 0.566543 |
| rs4782812  | 16 | 83563611 | 0.036  | 0.971622  | -0.713 | 0.475575 |
| rs276967   | 16 | 86233398 | 0.451  | 0.651985  | 0.212  | 0.831806 |
| rs9932551  | 16 | 87479384 | 0.368  | 0.71255   | 0.478  | 0.63268  |
| rs13337040 | 16 | 88444111 | 0.175  | 0.860768  | 0.427  | 0.669528 |
| rs11861895 | 16 | 88833474 | 0.056  | 0.955424  | 0.356  | 0.721957 |
| rs3212345  | 16 | 89982272 | -0.004 | 0.997081  | 0.285  | 0.775527 |
| rs869050   | 17 | 699988   | -1.883 | 0.0596518 | 0.12   | 0.904319 |
| rs2293067  | 17 | 1550106  | -1.902 | 0.0571474 | 0.284  | 0.776691 |
| rs4790359  | 17 | 2631985  | -1.845 | 0.0649684 | 0.53   | 0.596136 |
| rs399605   | 17 | 3440229  | -1.629 | 0.10336   | 0.567  | 0.570912 |
| rs9912347  | 17 | 5017772  | -1.541 | 0.123266  | 0.515  | 0.606602 |
| rs12942285 | 17 | 6258700  | -1.366 | 0.171917  | 0.286  | 0.774664 |
| rs444207   | 17 | 6982444  | -1.661 | 0.0966415 | -0.178 | 0.858512 |
| rs11652704 | 17 | 7584400  | -1.857 | 0.0632621 | -0.437 | 0.661955 |
| rs11078744 | 17 | 8305641  | -1.871 | 0.0613083 | -0.466 | 0.641221 |
| rs57851911 | 17 | 9206196  | -1.572 | 0.116018  | -0.59  | 0.555069 |
| rs4791367  | 17 | 9724374  | -1.479 | 0.139177  | -0.505 | 0.613669 |
| rs4792028  | 17 | 10667754 | -1.973 | 0.048483  | -1.142 | 0.253448 |
| rs7212298  | 17 | 11025242 | -2.039 | 0.0414706 | -1.197 | 0.231357 |
| rs12450112 | 17 | 12205234 | -1.708 | 0.0876208 | -0.823 | 0.410768 |
| rs11078126 | 17 | 13003915 | -1.201 | 0.229796  | -0.425 | 0.670908 |
| rs7219146  | 17 | 14450777 | -0.401 | 0.688134  | 0.031  | 0.975021 |
| rs2779192  | 17 | 15842823 | -0.157 | 0.875393  | 0.075  | 0.93994  |
| rs28452405 | 17 | 16982589 | 0.054  | 0.957245  | 0.267  | 0.789615 |
| rs8075306  | 17 | 17268266 | 0.071  | 0.94365   | 0.265  | 0.791114 |
| rs8080951  | 17 | 18278517 | 0.011  | 0.991533  | 0.408  | 0.683534 |
| rs28550346 | 17 | 19146445 | -0.024 | 0.981247  | 0.515  | 0.606661 |
| rs4924809  | 17 | 20044673 | -0.059 | 0.952696  | 0.542  | 0.587969 |
| rs2958475  | 17 | 20688829 | -0.057 | 0.954471  | 0.57   | 0.568865 |
| rs7207358  | 17 | 21433779 | 0.103  | 0.917745  | 0.727  | 0.467456 |
| rs34705075 | 17 | 22192695 | 0.147  | 0.882901  | 0.733  | 0.463261 |
| rs78825766 | 17 | 25268142 | 0.374  | 0.708665  | 0.739  | 0.459755 |
| rs7214606  | 17 | 25772929 | 0.447  | 0.654784  | 0.74   | 0.459471 |
| rs588562   | 17 | 26953872 | 0.586  | 0.557857  | 0.692  | 0.488986 |
| rs7216404  | 17 | 27215702 | 0.661  | 0.508588  | 0.706  | 0.480092 |
| rs11080116 | 17 | 28418765 | 0.688  | 0.491744  | 0.549  | 0.583257 |
| rs8073072  | 17 | 29350769 | 0.634  | 0.526008  | 0.514  | 0.607208 |
| rs735555   | 17 | 30817450 | 0.595  | 0.552045  | 0.631  | 0.528214 |
| rs6505324  | 17 | 31330864 | 0.602  | 0.547301  | 0.597  | 0.550196 |
| rs8073673  | 17 | 32343508 | 0.706  | 0.480283  | 0.419  | 0.67511  |
| rs212491   | 17 | 32730431 | 0.824  | 0.409661  | 0.578  | 0.563243 |
| rs1849741  | 17 | 33638904 | 0.72   | 0.471724  | 0.595  | 0.551825 |
| rs854655   | 17 | 34345223 | 0.872  | 0.383056  | 0.797  | 0.425219 |
| rs9892334  | 17 | 35307070 | 1.015  | 0.310255  | 0.683  | 0.494796 |
| rs7223184  | 17 | 36229246 | 1.319  | 0.187316  | 0.526  | 0.599118 |
| rs6503615  | 17 | 36589752 | 1.313  | 0.189079  | 0.456  | 0.648363 |
| rs56845786 | 17 | 37752005 | 1.225  | 0.220519  | 0.183  | 0.854534 |
| rs3136687  | 17 | 38717896 | 1.167  | 0.243203  | 0.135  | 0.892332 |
| rs9891361  | 17 | 39659913 | 1.193  | 0.232823  | 0.101  | 0.91964  |
| rs4796772  | 17 | 40268453 | 1.147  | 0.251221  | -0.097 | 0.922755 |
| rs2593595  | 17 | 41056245 | 1.217  | 0.223417  | 0.049  | 0.961227 |

|               |    |          |        |            |        |           |
|---------------|----|----------|--------|------------|--------|-----------|
| rs228768      | 17 | 42191893 | 1.135  | 0.2564     | -0.067 | 0.946442  |
| rs894685      | 17 | 43055039 | 1.046  | 0.2957     | -0.141 | 0.887889  |
| Affx-13924993 | 17 | 43783370 | 1.177  | 0.239357   | -0.28  | 0.77961   |
| rs4794160     | 17 | 45880748 | 1.4    | 0.16165    | -0.182 | 0.855846  |
| rs56670520    | 17 | 46745778 | 1.461  | 0.143968   | -0.184 | 0.85377   |
| rs166613      | 17 | 47943461 | 1.86   | 0.0628575  | 0.137  | 0.891237  |
| rs9895866     | 17 | 48895156 | 2.563  | 0.010366   | 0.836  | 0.403191  |
| rs6504712     | 17 | 49446154 | 2.87   | 0.00410923 | 1.049  | 0.294326  |
| rs8067663     | 17 | 50203816 | 3.118  | 0.00182083 | 1.205  | 0.228367  |
| rs62069606    | 17 | 51515708 | 3.074  | 0.00211261 | 1.02   | 0.30755   |
| rs6504909     | 17 | 52548125 | 3.187  | 0.00143685 | 1.144  | 0.252462  |
| rs9903170     | 17 | 53785504 | 2.953  | 0.00314412 | 1.264  | 0.206306  |
| rs35774871    | 17 | 54585145 | 2.712  | 0.0066965  | 0.912  | 0.362016  |
| rs2270379     | 17 | 55356209 | 1.646  | 0.0997667  | 0.464  | 0.642334  |
| rs2233911     | 17 | 56083934 | 1.068  | 0.285609   | 0.272  | 0.785349  |
| rs35058228    | 17 | 57255828 | 0.74   | 0.459039   | 0.038  | 0.970059  |
| rs8079220     | 17 | 58316733 | 0.367  | 0.713988   | -0.203 | 0.838843  |
| rs1197095     | 17 | 58610478 | 0.346  | 0.729591   | -0.237 | 0.812305  |
| rs12945805    | 17 | 59583441 | 0.126  | 0.900023   | -0.528 | 0.597589  |
| rs10853040    | 17 | 60472218 | 0.102  | 0.918616   | -0.843 | 0.399047  |
| rs3901444     | 17 | 60858059 | 0.116  | 0.907553   | -0.881 | 0.378144  |
| rs2727278     | 17 | 62016704 | -0.026 | 0.978893   | -1.043 | 0.296947  |
| rs9916525     | 17 | 63211437 | -0.309 | 0.7575     | -1.38  | 0.167542  |
| rs3923087     | 17 | 63549261 | -0.369 | 0.71182    | -1.403 | 0.160538  |
| rs9915504     | 17 | 64790434 | -0.917 | 0.35889    | -1.404 | 0.160402  |
| rs7207177     | 17 | 65465424 | -1.39  | 0.164479   | -1.593 | 0.111091  |
| rs8077384     | 17 | 66163231 | -1.518 | 0.128989   | -1.391 | 0.164238  |
| rs1984722     | 17 | 66988666 | -1.724 | 0.0847516  | -1.377 | 0.168496  |
| rs6501359     | 17 | 67992969 | -1.972 | 0.0486389  | -1.611 | 0.107079  |
| rs8076167     | 17 | 69233083 | -1.957 | 0.0503603  | -1.667 | 0.095462  |
| rs12450445    | 17 | 70776154 | -2.064 | 0.0390421  | -1.814 | 0.0696362 |
| rs9896656     | 17 | 71774648 | -1.751 | 0.080003   | -1.328 | 0.184294  |
| rs4789659     | 17 | 72398336 | -1.662 | 0.0964899  | -1.431 | 0.15239   |
| rs4789173     | 17 | 73349497 | -1.334 | 0.182111   | -1.218 | 0.223049  |
| rs8065144     | 17 | 73959857 | -1.429 | 0.152942   | -1.278 | 0.201398  |
| rs596007      | 17 | 74881525 | -1.632 | 0.102584   | -1.487 | 0.137123  |
| rs11655064    | 17 | 76661528 | -0.536 | 0.592243   | -1.176 | 0.239403  |
| rs11654023    | 17 | 76956268 | -0.354 | 0.723481   | -1.128 | 0.25937   |
| rs73351957    | 17 | 78829069 | 1.161  | 0.245794   | -0.727 | 0.467427  |
| rs113121823   | 17 | 79843562 | 1.77   | 0.0767966  | -0.438 | 0.661436  |
| rs6502091     | 17 | 80216370 | 1.882  | 0.0598324  | -0.363 | 0.716911  |
| rs9330525     | 17 | 81103682 | 1.85   | 0.0643838  | -0.44  | 0.659626  |
| rs1826508     | 18 | 1206984  | -1.171 | 0.241482   | 1.178  | 0.238828  |
| rs3843740     | 18 | 2456066  | -1.828 | 0.0675303  | 0.438  | 0.66153   |
| rs7241626     | 18 | 3803043  | -1.906 | 0.0566209  | 0.463  | 0.643686  |
| rs59520096    | 18 | 5048349  | -1.597 | 0.110364   | 0.718  | 0.472796  |
| rs2874686     | 18 | 5407839  | -1.437 | 0.150707   | 0.802  | 0.422435  |
| rs67347936    | 18 | 6384352  | -1.293 | 0.195881   | 0.66   | 0.509242  |
| rs1941141     | 18 | 7630982  | -1.395 | 0.163104   | 0.119  | 0.905126  |
| rs2080706     | 18 | 8729947  | -1.666 | 0.0957128  | 0.016  | 0.986865  |
| rs14336       | 18 | 9536315  | -1.614 | 0.106627   | 0.209  | 0.834759  |
| rs8083793     | 18 | 11550683 | -1.14  | 0.254285   | 1.403  | 0.160731  |
| rs628419      | 18 | 12013384 | -1.008 | 0.313592   | 1.52   | 0.128514  |

|               |    |          |        |          |        |           |
|---------------|----|----------|--------|----------|--------|-----------|
| Affx-14552656 | 18 | 13261896 | -1.066 | 0.286318 | 1.512  | 0.130567  |
| rs1284433     | 18 | 13634545 | -1.057 | 0.290349 | 1.505  | 0.132209  |
| rs4527110     | 18 | 14711974 | -1.129 | 0.259001 | 1.302  | 0.192929  |
| rs11660462    | 18 | 15050109 | -1.123 | 0.261508 | 1.333  | 0.182523  |
| rs3764962     | 18 | 19763011 | -1.234 | 0.217309 | 1.646  | 0.0996654 |
| rs11082067    | 18 | 20248798 | -1.241 | 0.214506 | 1.658  | 0.0974055 |
| rs2245433     | 18 | 21494218 | -1.273 | 0.202994 | 1.83   | 0.0671792 |
| rs8089453     | 18 | 22361567 | -1.129 | 0.258951 | 1.926  | 0.0540659 |
| rs765529      | 18 | 23590854 | -0.983 | 0.325763 | 1.958  | 0.0501928 |
| rs73411143    | 18 | 24345576 | -0.931 | 0.351724 | 1.893  | 0.0583131 |
| rs9961039     | 18 | 25302059 | -0.852 | 0.394468 | 1.609  | 0.107621  |
| rs4416099     | 18 | 26522040 | -0.522 | 0.601876 | 1.614  | 0.10661   |
| rs13313624    | 18 | 26872113 | -0.535 | 0.592779 | 1.555  | 0.119918  |
| rs2165780     | 18 | 28087317 | -0.602 | 0.546866 | 1.464  | 0.143281  |
| rs11664049    | 18 | 29289351 | -0.575 | 0.565427 | 1.294  | 0.195694  |
| rs4799675     | 18 | 30469952 | -0.756 | 0.449749 | 1.145  | 0.252361  |
| rs7235971     | 18 | 30941974 | -0.731 | 0.464741 | 1.129  | 0.259073  |
| rs6507096     | 18 | 32175025 | -0.654 | 0.513118 | 1.089  | 0.276024  |
| rs574192      | 18 | 32666860 | -0.532 | 0.595015 | 1.126  | 0.260271  |
| rs492392      | 18 | 33888781 | -0.129 | 0.897376 | 1.343  | 0.179144  |
| rs1941943     | 18 | 35094265 | 0.047  | 0.962415 | 1.191  | 0.233763  |
| rs11876306    | 18 | 35941362 | 0.131  | 0.895755 | 1.094  | 0.274169  |
| rs1788939     | 18 | 37044085 | 0.062  | 0.950901 | 1.013  | 0.311114  |
| rs2212963     | 18 | 37831499 | -0.143 | 0.886629 | 0.785  | 0.432303  |
| rs638874      | 18 | 38563016 | -0.156 | 0.875819 | 0.777  | 0.436874  |
| rs16975293    | 18 | 39346601 | -0.055 | 0.955892 | 0.867  | 0.385796  |
| rs12966036    | 18 | 40499693 | 0.188  | 0.850826 | 0.923  | 0.356091  |
| rs684289      | 18 | 40966885 | 0.218  | 0.827633 | 0.878  | 0.379972  |
| rs12970393    | 18 | 42123551 | 0.198  | 0.842896 | 0.786  | 0.431704  |
| rs2612579     | 18 | 42970524 | 0.195  | 0.84514  | 0.565  | 0.572093  |
| rs16978547    | 18 | 43938307 | 0.186  | 0.852423 | 0.399  | 0.689628  |
| rs931982      | 18 | 45110833 | 0.306  | 0.759872 | 0.418  | 0.676094  |
| rs12454113    | 18 | 46044052 | 0.233  | 0.816108 | 0.051  | 0.959264  |
| rs73435406    | 18 | 46440764 | 0.273  | 0.784737 | -0.004 | 0.9969    |
| rs2000900     | 18 | 47502338 | 0.009  | 0.992601 | -0.235 | 0.814465  |
| rs2847537     | 18 | 48328760 | -0.223 | 0.82321  | -0.404 | 0.686571  |
| rs7231971     | 18 | 49535051 | 0.018  | 0.985771 | -0.046 | 0.963085  |
| rs1373756     | 18 | 49786306 | 0.147  | 0.8832   | 0.055  | 0.956303  |
| rs8095056     | 18 | 50806334 | 0.307  | 0.75904  | 0.111  | 0.911414  |
| rs6508299     | 18 | 51967828 | 0.177  | 0.859277 | -0.048 | 0.961834  |
| rs1261129     | 18 | 52849162 | 0.07   | 0.944558 | -0.192 | 0.847418  |
| rs2187543     | 18 | 53753106 | -0.034 | 0.972697 | -0.296 | 0.767477  |
| rs12956085    | 18 | 54318503 | -0.056 | 0.955264 | -0.278 | 0.781167  |
| rs1217563     | 18 | 55091318 | -0.07  | 0.94392  | -0.18  | 0.857436  |
| rs894799      | 18 | 55771335 | -0.082 | 0.934605 | -0.211 | 0.832584  |
| rs67802189    | 18 | 56379230 | -0.087 | 0.930377 | -0.253 | 0.800226  |
| rs3133207     | 18 | 57248211 | 0.014  | 0.989013 | -0.164 | 0.869953  |
| rs10871774    | 18 | 57638330 | -0.094 | 0.92476  | -0.159 | 0.873439  |
| rs242710      | 18 | 58778679 | -0.263 | 0.792422 | -0.007 | 0.994038  |
| rs537171      | 18 | 59656877 | -0.396 | 0.692378 | 0.041  | 0.967144  |
| rs34480656    | 18 | 60385082 | -0.53  | 0.595926 | 0.084  | 0.933444  |
| rs9965098     | 18 | 61124919 | -0.616 | 0.538033 | 0.224  | 0.822601  |
| rs4377248     | 18 | 61862921 | -0.652 | 0.514107 | 0.272  | 0.785781  |

|            |    |          |        |            |        |           |
|------------|----|----------|--------|------------|--------|-----------|
| rs448398   | 18 | 62764587 | -0.513 | 0.607842   | 0.676  | 0.499057  |
| rs8086245  | 18 | 63499364 | -0.266 | 0.790389   | 1.063  | 0.287877  |
| rs9676060  | 18 | 64470342 | -0.255 | 0.7984     | 1.132  | 0.257746  |
| rs17829806 | 18 | 65335237 | -0.44  | 0.660297   | 0.996  | 0.319255  |
| rs309218   | 18 | 66354178 | -0.847 | 0.396927   | 0.873  | 0.382697  |
| rs4891380  | 18 | 67595384 | -1.371 | 0.170323   | 0.717  | 0.47339   |
| rs4393675  | 18 | 68250347 | -1.418 | 0.156065   | 0.643  | 0.520072  |
| rs6566532  | 18 | 69051326 | -1.765 | 0.0776059  | 0.469  | 0.638948  |
| rs658995   | 18 | 70207340 | -2.633 | 0.00846353 | -0.176 | 0.859925  |
| rs9963971  | 18 | 70896329 | -2.986 | 0.00282352 | -0.576 | 0.564337  |
| rs1367345  | 18 | 71482490 | -2.89  | 0.00384658 | -0.507 | 0.611957  |
| rs7228334  | 18 | 73500233 | -2.297 | 0.0216282  | 0.456  | 0.648432  |
| rs17059264 | 18 | 74069122 | -2.202 | 0.0276592  | 0.544  | 0.586764  |
| rs11150997 | 18 | 74764131 | -2.177 | 0.029483   | 0.448  | 0.654061  |
| rs8099804  | 18 | 75700101 | -2.099 | 0.0358351  | 0.245  | 0.806529  |
| rs7236102  | 18 | 76065914 | -1.99  | 0.0466405  | 0.367  | 0.713553  |
| rs9518     | 18 | 77288806 | -2.052 | 0.040175   | -0.041 | 0.967204  |
| rs3809929  | 18 | 77634361 | -2.046 | 0.0407195  | -0.046 | 0.963422  |
| rs12104233 | 19 | 1310821  | -0.976 | 0.328856   | -0.374 | 0.708689  |
| rs9630889  | 19 | 1685091  | -0.866 | 0.386579   | -0.274 | 0.784031  |
| rs7507968  | 19 | 2889166  | -1.12  | 0.262504   | -0.698 | 0.485322  |
| rs7246261  | 19 | 3565357  | -0.808 | 0.419141   | -0.449 | 0.653093  |
| rs7254885  | 19 | 4539086  | 0.018  | 0.985558   | 0.691  | 0.489595  |
| rs2436493  | 19 | 5777323  | 0.326  | 0.744566   | 1.272  | 0.203503  |
| rs8102597  | 19 | 6391219  | 0.339  | 0.734534   | 1.249  | 0.211795  |
| rs6603095  | 19 | 7411780  | 0.895  | 0.370732   | 1.196  | 0.231653  |
| rs10906992 | 19 | 8165159  | 0.651  | 0.515264   | 1.106  | 0.268788  |
| rs8103697  | 19 | 9354461  | 0.808  | 0.419106   | 1.447  | 0.147841  |
| rs6511267  | 19 | 10031745 | 0.996  | 0.319254   | 1.446  | 0.148043  |
| rs11557092 | 19 | 11257018 | 0.964  | 0.33512    | 1.173  | 0.240608  |
| rs2052474  | 19 | 11656995 | 0.967  | 0.333636   | 1.164  | 0.244607  |
| rs10413249 | 19 | 12830209 | 1.035  | 0.300781   | 1.441  | 0.14958   |
| rs2900918  | 19 | 13505333 | 0.997  | 0.318805   | 1.483  | 0.138014  |
| rs8101554  | 19 | 14698231 | 0.946  | 0.344048   | 1.423  | 0.154782  |
| rs7260124  | 19 | 15002827 | 0.91   | 0.362944   | 1.378  | 0.168173  |
| rs8109500  | 19 | 16126766 | 0.916  | 0.359509   | 1.589  | 0.112013  |
| rs2431803  | 19 | 16806698 | 0.904  | 0.366045   | 1.634  | 0.102235  |
| rs10406968 | 19 | 18021955 | 1.193  | 0.232743   | 1.807  | 0.0706921 |
| rs8106688  | 19 | 18651801 | 1.279  | 0.201009   | 1.858  | 0.0631108 |
| rs2905426  | 19 | 19478022 | 1.389  | 0.164874   | 1.927  | 0.0540249 |
| rs28832601 | 19 | 20605360 | 1.504  | 0.132633   | 1.969  | 0.048952  |
| rs2115495  | 19 | 21314102 | 1.562  | 0.118346   | 2.028  | 0.0425395 |
| rs16999012 | 19 | 22522950 | 1.57   | 0.116369   | 2      | 0.0455454 |
| rs3813587  | 19 | 22799293 | 1.572  | 0.115928   | 1.993  | 0.0462439 |
| rs1210368  | 19 | 23789538 | 1.586  | 0.112847   | 2.009  | 0.0445333 |
| rs4986275  | 19 | 24437567 | 1.574  | 0.115558   | 2.009  | 0.0444899 |
| rs58451908 | 19 | 28809738 | 1.492  | 0.135608   | 2.01   | 0.0444543 |
| rs867815   | 19 | 29534082 | 1.494  | 0.135077   | 2.023  | 0.0430938 |
| rs335751   | 19 | 30641424 | 1.471  | 0.141363   | 2.024  | 0.0429417 |
| rs10403598 | 19 | 30971966 | 1.414  | 0.157458   | 1.993  | 0.0462324 |
| rs8110039  | 19 | 32090038 | 1.15   | 0.250347   | 1.828  | 0.0675219 |
| rs414496   | 19 | 33106761 | 0.849  | 0.395904   | 1.543  | 0.122869  |
| rs7251626  | 19 | 33578470 | 0.78   | 0.435428   | 1.449  | 0.147341  |

|               |    |          |        |             |        |            |
|---------------|----|----------|--------|-------------|--------|------------|
| rs1669261     | 19 | 34808949 | 0.918  | 0.358508    | 1.44   | 0.149941   |
| rs2546012     | 19 | 35430764 | 1.109  | 0.267516    | 1.392  | 0.163827   |
| rs7257789     | 19 | 36426667 | 1.197  | 0.231404    | 1.242  | 0.214417   |
| rs493482      | 19 | 37366048 | 1.266  | 0.205682    | 1.23   | 0.218523   |
| rs705493      | 19 | 38438505 | 1.276  | 0.201861    | 1.234  | 0.217279   |
| rs2231738     | 19 | 40450048 | 1.743  | 0.0812858   | 1.469  | 0.141829   |
| rs4803325     | 19 | 40823587 | 1.755  | 0.0793409   | 1.436  | 0.151      |
| rs11672691    | 19 | 41985587 | 1.655  | 0.0980224   | 1.544  | 0.122567   |
| rs717225      | 19 | 42393286 | 1.68   | 0.0929333   | 1.691  | 0.0907848  |
| rs10425161    | 19 | 43299113 | 1.639  | 0.10125     | 1.694  | 0.090255   |
| rs397133      | 19 | 44487889 | 1.233  | 0.217666    | 1.62   | 0.105268   |
| rs28807203    | 19 | 45173951 | 1.135  | 0.25618     | 1.567  | 0.117009   |
| rs60600938    | 19 | 45836109 | 0.994  | 0.320274    | 1.625  | 0.104213   |
| rs7251500     | 19 | 46571411 | 1.013  | 0.311003    | 1.705  | 0.088241   |
| rs8101149     | 19 | 47600441 | 1.314  | 0.188875    | 2.04   | 0.0413674  |
| rs8101879     | 19 | 48249288 | 1.428  | 0.153227    | 2.188  | 0.0286616  |
| rs11671777    | 19 | 49424925 | 1.678  | 0.0932602   | 2.606  | 0.00916385 |
| rs11878551    | 19 | 49987014 | 1.524  | 0.127509    | 2.552  | 0.0107149  |
| rs2445837     | 19 | 50921272 | 1.272  | 0.203529    | 2.342  | 0.0191895  |
| rs2459144     | 19 | 51790992 | 0.988  | 0.323069    | 2.103  | 0.0354774  |
| rs3745099     | 19 | 52901905 | 0.757  | 0.449171    | 1.977  | 0.0480669  |
| rs1650941     | 19 | 53506797 | 0.665  | 0.50611     | 1.987  | 0.0468957  |
| rs8103771     | 19 | 54367597 | 0.871  | 0.383915    | 1.826  | 0.0678521  |
| rs890869      | 19 | 55633043 | 1.056  | 0.291149    | 1.951  | 0.0510546  |
| rs4801676     | 19 | 56626448 | 1.198  | 0.231001    | 2.016  | 0.0437914  |
| rs8107733     | 19 | 57410668 | 1.758  | 0.078732    | 2.581  | 0.009855   |
| rs7255638     | 19 | 58290009 | 2.171  | 0.0299568   | 2.886  | 0.0038969  |
| rs8109437     | 19 | 58952327 | 2.407  | 0.0160738   | 2.925  | 0.00344535 |
| rs554362      | 20 | 902002   | -2.9   | 0.00373566  | -1.163 | 0.244894   |
| Affx-16472846 | 20 | 2041016  | -3.28  | 0.00103748  | -1.285 | 0.198919   |
| rs6051863     | 20 | 3416845  | -3.6   | 0.000318025 | -1.78  | 0.0750837  |
| rs6052095     | 20 | 3803446  | -3.646 | 0.000266814 | -1.811 | 0.0701445  |
| rs6139785     | 20 | 5624707  | -3.707 | 0.000209426 | -1.948 | 0.0514083  |
| rs6054475     | 20 | 6677462  | -3.804 | 0.000142487 | -2.44  | 0.0146796  |
| rs2294306     | 20 | 7869025  | -3.731 | 0.000190349 | -1.964 | 0.0495877  |
| rs6056523     | 20 | 9292176  | -3.274 | 0.00105936  | -1.663 | 0.0963774  |
| rs8121647     | 20 | 10362383 | -2.721 | 0.00650918  | -1.184 | 0.236418   |
| rs6033098     | 20 | 11289485 | -1.949 | 0.0512493   | -0.462 | 0.643749   |
| rs6033437     | 20 | 12495731 | -1.458 | 0.144888    | -0.071 | 0.943077   |
| rs646814      | 20 | 12991536 | -1.123 | 0.261377    | 0.274  | 0.784215   |
| rs1570485     | 20 | 14191827 | -0.988 | 0.323092    | 0.383  | 0.701451   |
| rs6043062     | 20 | 15011590 | -1.015 | 0.310185    | 0.39   | 0.69658    |
| rs1011643     | 20 | 15544065 | -0.618 | 0.536657    | 0.753  | 0.451721   |
| rs6044197     | 20 | 16631414 | -0.719 | 0.472013    | 0.822  | 0.41091    |
| rs6034866     | 20 | 17603728 | -0.577 | 0.563668    | 1.027  | 0.304633   |
| rs57677334    | 20 | 17906304 | -0.67  | 0.502588    | 0.961  | 0.336597   |
| rs6045732     | 20 | 18966976 | -0.796 | 0.425756    | 0.87   | 0.38427    |
| rs6046024     | 20 | 19346184 | -0.795 | 0.42665     | 0.948  | 0.343005   |
| rs6046851     | 20 | 20405802 | -0.434 | 0.664119    | 1.217  | 0.223472   |
| rs6047244     | 20 | 21077903 | -0.342 | 0.732663    | 1.071  | 0.284058   |
| rs2424404     | 20 | 21740242 | -0.284 | 0.776046    | 1.052  | 0.292665   |
| rs6036107     | 20 | 22403287 | -0.465 | 0.642145    | 0.877  | 0.380596   |
| rs2153987     | 20 | 23322400 | -0.451 | 0.651869    | 0.751  | 0.452701   |

|             |    |          |        |           |        |          |
|-------------|----|----------|--------|-----------|--------|----------|
| rs3843779   | 20 | 24030976 | -0.368 | 0.712712  | 0.718  | 0.47262  |
| rs2892217   | 20 | 24645939 | -0.478 | 0.632734  | 0.546  | 0.584927 |
| rs4815445   | 20 | 25675602 | -0.596 | 0.550842  | 0.428  | 0.668461 |
| rs845785    | 20 | 26194104 | -0.599 | 0.549047  | 0.426  | 0.669993 |
| rs6060262   | 20 | 30193071 | -0.727 | 0.46742   | 0.335  | 0.737524 |
| rs880113    | 20 | 31128302 | -0.825 | 0.409185  | 0.346  | 0.729209 |
| rs4911320   | 20 | 31914031 | -1.048 | 0.294549  | 0.431  | 0.666481 |
| rs1205357   | 20 | 32877766 | -0.951 | 0.341449  | 0.645  | 0.518944 |
| rs224371    | 20 | 34074831 | -0.82  | 0.412379  | 0.717  | 0.473116 |
| rs6058423   | 20 | 34747808 | -0.798 | 0.425046  | 0.772  | 0.440301 |
| rs6018027   | 20 | 35990792 | -0.914 | 0.360759  | 0.992  | 0.320972 |
| rs6092422   | 20 | 37018833 | -1.158 | 0.246966  | 1.37   | 0.170656 |
| rs2057334   | 20 | 38233163 | -1.117 | 0.263918  | 1.511  | 0.13079  |
| rs2223957   | 20 | 39543583 | -1.292 | 0.19649   | 1.338  | 0.180789 |
| rs6029785   | 20 | 40343341 | -1.304 | 0.192241  | 1.308  | 0.191042 |
| rs6016809   | 20 | 41122834 | -1.298 | 0.19413   | 0.974  | 0.329877 |
| rs6017218   | 20 | 42555737 | -0.844 | 0.398806  | 1.148  | 0.251033 |
| rs6031701   | 20 | 43285024 | -0.473 | 0.636388  | 1.201  | 0.229887 |
| rs6032198   | 20 | 44075848 | -0.373 | 0.708893  | 1.178  | 0.238771 |
| rs6017948   | 20 | 45269523 | -0.364 | 0.715779  | 0.799  | 0.424184 |
| rs6018424   | 20 | 45986984 | -0.593 | 0.55341   | 0.312  | 0.755221 |
| rs2426053   | 20 | 46566785 | -0.408 | 0.683515  | 0.218  | 0.827724 |
| rs2281288   | 20 | 47343460 | -0.019 | 0.984776  | 0.371  | 0.710629 |
| rs6095640   | 20 | 48354237 | 0.165  | 0.868642  | 0.353  | 0.723927 |
| rs1010944   | 20 | 49525434 | 0.171  | 0.864616  | 0.206  | 0.836725 |
| rs73279541  | 20 | 49894389 | 0.142  | 0.886837  | -0.003 | 0.99742  |
| rs6063796   | 20 | 51093873 | -0.175 | 0.861286  | -0.287 | 0.773778 |
| rs707548    | 20 | 51384603 | -0.187 | 0.851624  | -0.26  | 0.794779 |
| rs6097654   | 20 | 52504385 | -0.271 | 0.78677   | -0.51  | 0.609702 |
| rs2426515   | 20 | 53072717 | 0.076  | 0.939734  | -0.378 | 0.705613 |
| rs2426553   | 20 | 53757694 | 0.048  | 0.962017  | -0.452 | 0.6513   |
| rs1926062   | 20 | 54795923 | -0.033 | 0.973983  | -0.578 | 0.563178 |
| rs12626109  | 20 | 55354424 | -0.241 | 0.809223  | -0.439 | 0.660329 |
| rs4810108   | 20 | 56449176 | -0.224 | 0.822707  | 0.169  | 0.865774 |
| rs6070538   | 20 | 57197938 | -0.425 | 0.670584  | 0.182  | 0.855278 |
| rs843819    | 20 | 58405220 | -0.319 | 0.749824  | 0.123  | 0.901833 |
| rs911382    | 20 | 58686368 | -0.273 | 0.785216  | 0.099  | 0.921172 |
| rs6071539   | 20 | 59773788 | -0.805 | 0.420791  | -0.105 | 0.916727 |
| rs6061619   | 20 | 60112199 | -0.662 | 0.507777  | -0.124 | 0.901358 |
| rs6121609   | 20 | 61038322 | -0.281 | 0.778873  | -0.394 | 0.693264 |
| rs6010955   | 20 | 62159173 | 0.455  | 0.64935   | -0.422 | 0.673352 |
| rs2320356   | 20 | 62841017 | 0.547  | 0.584129  | -0.314 | 0.753432 |
| rs114673230 | 21 | 14726399 | -1.687 | 0.0916323 | -1.009 | 0.312977 |
| rs9305343   | 21 | 15841092 | -1.636 | 0.101907  | -0.942 | 0.346003 |
| rs9977149   | 21 | 17014200 | -1.66  | 0.0970124 | -0.981 | 0.326587 |
| rs2823880   | 21 | 17928554 | -1.562 | 0.118374  | -0.931 | 0.351649 |
| rs7276293   | 21 | 19126079 | -2.041 | 0.0412641 | -1.355 | 0.175538 |
| rs2824827   | 21 | 19804368 | -2.059 | 0.0394909 | -1.124 | 0.26122  |
| rs2825593   | 21 | 20835905 | -1.795 | 0.0726852 | -0.57  | 0.568874 |
| rs8132339   | 21 | 22565410 | -1.337 | 0.181112  | 0.337  | 0.736288 |
| rs2827383   | 21 | 23681095 | -1.224 | 0.220772  | 0.407  | 0.684202 |
| rs2828666   | 21 | 25355197 | -0.949 | 0.342844  | 0.29   | 0.771967 |
| rs12626581  | 21 | 25713654 | -1.023 | 0.306428  | 0.142  | 0.88706  |

|            |    |          |        |           |        |            |
|------------|----|----------|--------|-----------|--------|------------|
| rs7278807  | 21 | 26926066 | -1.092 | 0.274692  | 0.085  | 0.932085   |
| rs214488   | 21 | 27287924 | -1.02  | 0.307759  | 0.136  | 0.891643   |
| rs73901120 | 21 | 28223561 | -0.6   | 0.548298  | 0.357  | 0.721124   |
| rs13049543 | 21 | 29827623 | -0.332 | 0.740159  | 0.557  | 0.577741   |
| rs2070398  | 21 | 30878364 | -0.451 | 0.652177  | 0.544  | 0.586395   |
| rs2832643  | 21 | 31528217 | -0.602 | 0.547461  | 0.487  | 0.626537   |
| rs2833283  | 21 | 32497674 | -0.537 | 0.59158   | 0.689  | 0.490833   |
| rs4817481  | 21 | 33677042 | -0.053 | 0.958043  | 1.022  | 0.306765   |
| rs8178488  | 21 | 34651793 | 0.516  | 0.605649  | 1.133  | 0.257167   |
| rs11911023 | 21 | 35236435 | 0.671  | 0.502143  | 1.236  | 0.216421   |
| rs2834670  | 21 | 36280376 | 1.035  | 0.30047   | 1.359  | 0.174156   |
| rs2834847  | 21 | 36588180 | 1.158  | 0.246911  | 1.533  | 0.125164   |
| rs2269187  | 21 | 37761364 | 1.438  | 0.15032   | 1.88   | 0.0601299  |
| rs2836181  | 21 | 39555810 | 2.033  | 0.0420262 | 2.623  | 0.00872391 |
| rs1013777  | 21 | 40157745 | 2.195  | 0.0281871 | 2.709  | 0.00675514 |
| rs2837130  | 21 | 41101029 | 2.148  | 0.0317136 | 2.691  | 0.00712459 |
| rs2837456  | 21 | 41518401 | 1.925  | 0.054253  | 2.359  | 0.0183398  |
| rs16998089 | 21 | 42551626 | 1.477  | 0.139608  | 1.765  | 0.0775453  |
| rs225412   | 21 | 43643100 | 0.548  | 0.583865  | 0.867  | 0.385901   |
| rs605781   | 21 | 44734007 | 0.262  | 0.793021  | 0.891  | 0.373159   |
| rs2238708  | 21 | 45448828 | -0.015 | 0.988002  | 0.5    | 0.616977   |
| rs468278   | 21 | 46042282 | 0.023  | 0.981815  | 0.051  | 0.959563   |
| rs2839213  | 21 | 47752496 | 1.07   | 0.284444  | -0.061 | 0.95171    |
| rs2385714  | 22 | 17285949 | -0.639 | 0.522646  | 0.196  | 0.844566   |
| rs5992837  | 22 | 18263018 | -0.775 | 0.438244  | 0.127  | 0.898619   |
| rs361557   | 22 | 18611223 | -1.005 | 0.315024  | 0.035  | 0.972465   |
| rs854936   | 22 | 20260814 | -0.899 | 0.368824  | 0.273  | 0.784578   |
| rs432869   | 22 | 21408430 | -0.647 | 0.517567  | 0.597  | 0.550782   |
| rs737796   | 22 | 22438050 | -0.412 | 0.680419  | 0.876  | 0.380761   |
| rs756738   | 22 | 23283370 | -0.317 | 0.750992  | 0.715  | 0.4746     |
| rs8138979  | 22 | 23910746 | -0.354 | 0.722979  | 0.388  | 0.698253   |
| rs12160768 | 22 | 25030745 | -0.317 | 0.751528  | 0.169  | 0.865726   |
| rs5752014  | 22 | 25287889 | -0.364 | 0.71614   | 0.042  | 0.966865   |
| rs6004919  | 22 | 26455216 | -0.361 | 0.717911  | -0.031 | 0.975494   |
| rs650276   | 22 | 26792236 | -0.276 | 0.782437  | -0.15  | 0.881038   |
| rs9306441  | 22 | 27831461 | -0.19  | 0.849221  | -1.761 | 0.0783163  |
| rs6005627  | 22 | 28198577 | -0.051 | 0.959011  | -2.24  | 0.0251229  |
| rs5752844  | 22 | 29359102 | -0.009 | 0.992941  | -2.343 | 0.0191138  |
| rs4823071  | 22 | 30492300 | -0.013 | 0.989392  | -2.492 | 0.0126881  |
| rs67153574 | 22 | 31061283 | 0.04   | 0.967873  | -2.524 | 0.0116118  |
| rs470072   | 22 | 32263131 | 0.224  | 0.822989  | -2.473 | 0.0134021  |
| rs2858729  | 22 | 32995281 | 0.823  | 0.410704  | -2.374 | 0.0176189  |
| rs5998832  | 22 | 33661960 | 0.798  | 0.424603  | -2.47  | 0.0135108  |
| rs5999196  | 22 | 34469292 | 0.705  | 0.48089   | -2.61  | 0.00906727 |
| rs1473816  | 22 | 35532734 | 0.646  | 0.51817   | -2.667 | 0.00766037 |
| rs916333   | 22 | 36422904 | 0.4    | 0.689368  | -2.875 | 0.00404282 |
| rs9622589  | 22 | 37640671 | 0.619  | 0.536129  | -2.341 | 0.0192089  |
| rs73409263 | 22 | 38711683 | 0.731  | 0.465014  | -2.36  | 0.0182678  |
| rs2899306  | 22 | 39269721 | 0.874  | 0.382364  | -2.312 | 0.0207574  |
| rs6001762  | 22 | 40495473 | 1.392  | 0.163931  | -2.375 | 0.0175337  |
| rs5758302  | 22 | 41734757 | 1.386  | 0.165754  | -2.373 | 0.0176539  |
| rs5996057  | 22 | 42130324 | 1.378  | 0.168281  | -2.391 | 0.0168121  |
| rs137116   | 22 | 43011674 | 1.204  | 0.228667  | -2.5   | 0.0124101  |

|              |    |          |       |           |        |           |
|--------------|----|----------|-------|-----------|--------|-----------|
| rs135052     | 22 | 43843065 | 0.957 | 0.338733  | -2.631 | 0.0085137 |
| rs8142147    | 22 | 45038965 | 0.746 | 0.455451  | -1.827 | 0.0677331 |
| rs6007892    | 22 | 46771921 | 0.708 | 0.478643  | -0.919 | 0.358097  |
| rs10483235   | 22 | 47814553 | 1.032 | 0.302239  | -0.507 | 0.611889  |
| rs6007813    | 22 | 48591341 | 1.258 | 0.208436  | -0.038 | 0.96969   |
| Afx-19798982 | 22 | 49557389 | 1.787 | 0.0739454 | 0.517  | 0.604932  |
| rs6010132    | 22 | 50952244 | 1.752 | 0.0798528 | 0.435  | 0.663338  |
